# Supplementary material for: Hypoelectronic titanaboranes: icosahedral and tetracapped tetrahedral clusters comprising bridging hydrides
Source: Royal Society of Chemistry journal article supplement (doi:10.1039/d4cc06535b), 2025-01-01
Supplement: d4cc06535b1.pdf [file d4cc06535b1.pdf]

*Supplementary Information*

**Hypoelectronic Titanaboranes: Icosahedral and Tetracapped  
Tetrahedral Clusters Comprising Bridging Hydrides**

Subhash Bairagi, Debipada Chatterjee,<sup>‡</sup> Soumen Giri<sup>‡</sup> and Sundargopal Ghosh\*

Department of Chemistry, Indian Institute of Technology Madras, Chennai 600036, India, E-mail: [sghosh@iitm.ac.in](mailto:sghosh@iitm.ac.in)

<sup>‡</sup>These authors contributed equally to this work.

## Table of contents

### I Experimental Details

|           |                                        |    |
|-----------|----------------------------------------|----|
| Scheme S1 | Synthesis of <b>1</b> .                | S5 |
| Scheme S2 | Synthesis of <b>2</b> .                | S6 |
| Scheme S3 | Synthesis of <b>3a</b> and <b>3b</b> . | S6 |

### I.1 UV-visible Studies S7

### I.2 Supplementary Data

|           |                                                                                              |     |
|-----------|----------------------------------------------------------------------------------------------|-----|
| Figure S1 | Molecular structure and labelling diagram of <b>1</b> .                                      | S8  |
| Figure S2 | Icosahedron core [Ti <sub>3</sub> B <sub>9</sub> ] of <b>1</b> .                             | S8  |
| Figure S3 | Molecular structure and labelling diagram of <b>2</b> .                                      | S9  |
| Figure S4 | Tetracapped tetrahedron [Ti <sub>3</sub> B <sub>3</sub> Te <sub>2</sub> ] core of <b>2</b> . | S9  |
| Figure S5 | Molecular structure and labelling diagram of <b>3b</b> .                                     | S10 |
| Figure S6 | [Ti <sub>2</sub> B <sub>5</sub> ] core of <b>3b</b> .                                        | S10 |

### I.3 Spectroscopic Details

|            |                                                                                                       |     |
|------------|-------------------------------------------------------------------------------------------------------|-----|
| Figure S7  | ESI-MS spectrum of <b>1</b> .                                                                         | S11 |
| Figure S8  | <sup>11</sup> B{ <sup>1</sup> H} NMR spectrum of <b>1</b> .                                           | S11 |
| Figure S9  | <sup>11</sup> B NMR spectrum of <b>1</b> .                                                            | S12 |
| Figure S10 | <sup>1</sup> H NMR spectrum of <b>1</b> .                                                             | S12 |
| Figure S11 | <sup>13</sup> C{ <sup>1</sup> H} NMR spectrum of <b>1</b> .                                           | S13 |
| Figure S12 | IR spectrum of <b>1</b> .                                                                             | S13 |
| Figure S13 | ESI-MS spectrum of <b>2</b> .                                                                         | S14 |
| Figure S14 | <sup>11</sup> B{ <sup>1</sup> H} NMR spectrum of <b>2</b> .                                           | S14 |
| Figure S15 | <sup>1</sup> H NMR spectrum of <b>2</b> .                                                             | S15 |
| Figure S16 | <sup>1</sup> H{ <sup>11</sup> B} NMR spectrum of <b>2</b> .                                           | S15 |
| Figure S17 | Stacked <sup>1</sup> H (bottom) and <sup>1</sup> H{ <sup>11</sup> B} NMR (top) spectra of <b>2</b> .  | S15 |
| Figure S18 | <sup>1</sup> H- <sup>11</sup> B HSQC NMR spectrum of <b>2</b> .                                       | S16 |
| Figure S19 | IR spectrum of <b>2</b> .                                                                             | S16 |
| Figure S20 | ESI-MS spectrum of <b>3a</b> .                                                                        | S17 |
| Figure S21 | <sup>11</sup> B{ <sup>1</sup> H} NMR spectrum of <b>3a</b> .                                          | S17 |
| Figure S22 | <sup>11</sup> B NMR spectrum of <b>3a</b> .                                                           | S18 |
| Figure S23 | <sup>1</sup> H NMR spectrum of <b>3a</b> .                                                            | S18 |
| Figure S24 | <sup>1</sup> H{ <sup>11</sup> B} NMR spectrum of <b>3a</b> .                                          | S19 |
| Figure S25 | Stacked <sup>1</sup> H (bottom) and <sup>1</sup> H{ <sup>11</sup> B} NMR (top) spectra of <b>3a</b> . | S19 |
| Figure S26 | <sup>13</sup> C{ <sup>1</sup> H} NMR spectrum of <b>3a</b> .                                          | S19 |
| Figure S27 | <sup>77</sup> Se NMR spectrum of <b>3a</b> .                                                          | S20 |
| Figure S28 | IR spectrum of <b>3a</b> .                                                                            | S20 |
| Figure S29 | ESI-MS spectrum of <b>3b</b> .                                                                        | S21 |

|            |                                                                                                                                                                                                                                                                                                              |     |
|------------|--------------------------------------------------------------------------------------------------------------------------------------------------------------------------------------------------------------------------------------------------------------------------------------------------------------|-----|
| Figure S30 | $^{11}\text{B}\{^1\text{H}\}$ NMR spectrum of <b>3b</b> .                                                                                                                                                                                                                                                    | S21 |
| Figure S31 | $^{11}\text{B}$ NMR spectrum of <b>3b</b> .                                                                                                                                                                                                                                                                  | S22 |
| Figure S32 | $^1\text{H}$ NMR spectrum of <b>3b</b> .                                                                                                                                                                                                                                                                     | S22 |
| Figure S33 | $^1\text{H}\{^{11}\text{B}\}$ NMR spectrum of <b>3b</b> .                                                                                                                                                                                                                                                    | S23 |
| Figure S34 | Stacked $^1\text{H}$ (bottom) and $^1\text{H}\{^{11}\text{B}\}$ NMR (top) spectra of <b>3b</b> .                                                                                                                                                                                                             | S23 |
| Figure S35 | $^{13}\text{C}\{^1\text{H}\}$ NMR spectrum of <b>3b</b> .                                                                                                                                                                                                                                                    | S23 |
| Figure S36 | $^{77}\text{Se}$ NMR spectrum of <b>3b</b> .                                                                                                                                                                                                                                                                 | S24 |
| Figure S37 | IR spectrum of <b>3b</b> .                                                                                                                                                                                                                                                                                   | S24 |
| Figure S38 | Combined UV-vis spectra of <b>1</b> , <b>2</b> , <b>3a</b> , and <b>3b</b> in $\text{CH}_2\text{Cl}_2$ .                                                                                                                                                                                                     | S25 |
| <b>I.4</b> | <b>X-ray Analysis Details</b>                                                                                                                                                                                                                                                                                | S26 |
| <b>II</b>  | <b>Computational Details</b>                                                                                                                                                                                                                                                                                 | S26 |
| Table S1   | Selected geometrical parameters and Wiberg bond indices (WBI) of <b>1</b> , <b>2</b> , <b>3a</b> , and <b>3b</b> .                                                                                                                                                                                           | S27 |
| Table S2   | Selected experimental and Calculated bond angles of <b>1</b> , <b>2</b> , <b>3a</b> , and <b>3b</b> .                                                                                                                                                                                                        | S28 |
| Table S3   | Calculated natural charges ( <i>q</i> ) and natural valence population (Pop) of <b>1</b> , <b>2</b> , <b>3a</b> , and <b>3b</b> .                                                                                                                                                                            | S28 |
| Table S4   | Calculated HOMO–LUMO energy gap of <b>1</b> , <b>2</b> , <b>3a</b> , and <b>3b</b> .                                                                                                                                                                                                                         | S29 |
| Table S5   | Calculated $^{11}\text{B}$ chemical shifts for complexes <b>1</b> , <b>2</b> , <b>3a</b> , and <b>3b</b> .                                                                                                                                                                                                   | S29 |
| Figure S39 | Selected molecular orbitals of <b>1</b> .                                                                                                                                                                                                                                                                    | S30 |
| Figure S40 | Selected NBO interactions of <b>1</b> .                                                                                                                                                                                                                                                                      | S30 |
| Figure S41 | Contour-line diagram of the Laplacian of the electron density of <b>1</b> in selected planes.                                                                                                                                                                                                                | S31 |
| Figure S42 | Selected molecular orbitals of <b>2</b> .                                                                                                                                                                                                                                                                    | S31 |
| Figure S43 | Selected NBO interactions of <b>2</b> .                                                                                                                                                                                                                                                                      | S32 |
| Figure S44 | Contour-line diagram of the Laplacian of the electron density of <b>2</b> in selected planes.                                                                                                                                                                                                                | S32 |
| Figure S45 | Selected molecular orbitals of <b>3a</b> .                                                                                                                                                                                                                                                                   | S33 |
| Figure S46 | Selected NBO interactions of <b>3a</b> .                                                                                                                                                                                                                                                                     | S33 |
| Figure S47 | Contour-line diagram of the Laplacian of the electron density of <b>3a</b> in selected planes.                                                                                                                                                                                                               | S34 |
| Figure S48 | (a) Selected NBO interaction of <b>3b</b> . (b) Contour-line diagram of the Laplacian of the electron density of <b>3b</b> along B2-C1-C2 plane.                                                                                                                                                             | S34 |
| Figure S49 | Absorption spectrum of <b>1</b> computed at TD-DFT-B3LYP/Def2-SVP level of theory.                                                                                                                                                                                                                           | S35 |
| Table S6   | TD-DFT calculated energies (excitation energy (eV), $\lambda_{\text{calc}}$ (nm)), oscillator strength ( <i>f</i> ), and main composition of the first UV–vis electronic excitations for <b>1</b> . Experimental absorption wavelengths ( $\lambda_{\text{exp}}$ , nm) of <b>1</b> are given for comparison. | S35 |
| Figure S50 | Selected molecular orbitals of <b>1</b> related to most intense electronic transitions.                                                                                                                                                                                                                      | S36 |
| Figure S51 | Absorption spectrum of <b>2</b> computed at TD-DFT-B3LYP/Def2-SVP level of theory.                                                                                                                                                                                                                           | S36 |
| Table S7   | TD-DFT calculated energies (excitation energy (eV), $\lambda_{\text{calc}}$ (nm)), oscillator strength ( <i>f</i> ), and main composition of the first UV–vis electronic excitations for <b>2</b> . Experimental absorption wavelengths ( $\lambda_{\text{exp}}$ , nm) of <b>2</b> are given for comparison. | S37 |
| Figure S52 | Selected molecular orbitals of <b>2</b> related to most intense electronic transitions.                                                                                                                                                                                                                      | S38 |
| Figure S53 | Absorption spectrum of <b>3a</b> computed at TD-DFT-B3LYP/Def2-SVP level of theory.                                                                                                                                                                                                                          | S38 |

|                                                              |                                                                                                                                                                                                                                                                                                           |     |
|--------------------------------------------------------------|-----------------------------------------------------------------------------------------------------------------------------------------------------------------------------------------------------------------------------------------------------------------------------------------------------------|-----|
| Table S8                                                     | TD-DFT calculated energies (excitation energy (eV), $\lambda_{\text{calc}}$ (nm)), oscillator strength ( $f$ ), and main composition of the first UV–vis electronic excitations for <b>3a</b> . Experimental absorption wavelengths ( $\lambda_{\text{exp}}$ , nm) of <b>3a</b> are given for comparison. | S39 |
| Figure S54                                                   | Selected molecular orbitals of <b>3a</b> related to most intense electronic transitions.                                                                                                                                                                                                                  | S40 |
| Figure S55                                                   | Absorption spectrum of <b>3b</b> computed at TD-DFT-B3LYP/Def2-SVP level of theory.                                                                                                                                                                                                                       | S40 |
| Table S9                                                     | TD-DFT calculated energies (excitation energy (eV), $\lambda_{\text{calc}}$ (nm)), oscillator strength ( $f$ ), and main composition of the first UV–vis electronic excitations for <b>3b</b> . Experimental absorption wavelengths ( $\lambda_{\text{exp}}$ , nm) of <b>3b</b> are given for comparison. | S41 |
| Figure S56                                                   | Selected molecular orbitals of <b>3b</b> related to most intense electronic transitions.                                                                                                                                                                                                                  | S42 |
| <b>III Cartesian Coordinates of all Optimized Structures</b> |                                                                                                                                                                                                                                                                                                           |     |
| Figure S57                                                   | Optimized geometry of <b>1</b> .                                                                                                                                                                                                                                                                          | S43 |
| Figure S58                                                   | Optimized geometry of <b>2</b> .                                                                                                                                                                                                                                                                          | S44 |
| Figure S59                                                   | Optimized geometry of <b>3a</b> .                                                                                                                                                                                                                                                                         | S45 |
| Figure S60                                                   | Optimized geometry of <b>3b</b> .                                                                                                                                                                                                                                                                         | S46 |
| <b>IV</b>                                                    | <b>References</b>                                                                                                                                                                                                                                                                                         | S48 |

## I Experimental Details

### General Procedures and Instrumentation

All the manipulations were conducted under an Ar/N<sub>2</sub> atmosphere using standard Schlenk line techniques or in a glove box. Hexane, THF, and toluene solvents were distilled from purple solutions of benzophenone ketyl. Dichloromethane and CDCl<sub>3</sub> were distilled from calcium hydride prior to use. [Cp\*TiCl<sub>3</sub>]<sup>[1]</sup> and Li[BH<sub>3</sub>(EPh)]<sup>[2,3]</sup> (E = Se and Te) were synthesized according to the literature methods, while LiBH<sub>4</sub> (2.0 M in THF) and [Ph<sub>2</sub>E<sub>2</sub>] (E = Se and Te) were used as received (Sigma Aldrich). Thin layer chromatography (TLC) was carried out on 250- $\mu$ m diameter aluminum-supported silica gel TLC plates (MERCK TLC Plates) to separate the reaction mixtures. NMR spectra were recorded on a Bruker Avance III 500 MHz spectrometer. The residual solvent protons (CDCl<sub>3</sub>,  $\delta$  = 7.26 ppm) and carbon (CDCl<sub>3</sub>,  $\delta$  = 77.1 ppm) were employed as a reference for the <sup>1</sup>H and <sup>13</sup>C{<sup>1</sup>H} NMR spectra, respectively. The <sup>77</sup>Se NMR chemical shifts are referenced with Se<sub>2</sub>Ph<sub>2</sub> ( $\delta$  = 463 ppm in CDCl<sub>3</sub>). The <sup>11</sup>B decoupled <sup>1</sup>H spectrum was obtained with inverse gated decoupling (zgif) and power gated decoupling (zgpr) pulse sequences, respectively. <sup>11</sup>B{<sup>1</sup>H} NMR spectra were processed with a backward linear prediction algorithm to eliminate the broad <sup>11</sup>B background signal of the NMR tube.<sup>[4]</sup> All pulse sequences are available in a commercial Bruker spectrometer. Electrospray mass (ESI-MS) spectrometric data were obtained on a Qtof Micro YA263 HRMS and 6545 Qtof LC/MS instrument. Infrared (IR) spectra of liquid samples (prepared in dichloromethane) were recorded on a JASCO FT/IR-1400 spectrometer. UV-vis spectra were recorded in dichloromethane on a Thermo Scientific (Evolution 300) UV-vis spectrometer.

**Synthesis of 1:** In a flame-dried Schlenk tube, [(Cp\*TiCl<sub>3</sub>) (0.100 g, 0.35 mmol) was suspended in 10 mL dry toluene and it was charged with lithium borohydride solution 2.0 M in THF (0.6 mL, 1.2 mmol) dropwise at -78 °C and kept under constant stirring for 1 h. To this in situ generated intermediate, an excess amount of [BH<sub>3</sub>·THF] (2.5 mL, 2.5 mmol) was added and kept at 90 °C for 48 h under stirring conditions. After the addition of [BH<sub>3</sub>·THF], the mixture becomes light green. Further, during thermolysis, the reaction mixture slowly converted to brown from light green and, after 48 h, changed to dark brown. After the completion of the reaction, the solvent was removed under vacuum. The residue was extracted with hexane/dichloromethane mixture (70:30 v/v) through a frit using 3 cm celite. The filtrate was concentrated, and the residue was subjected to chromatographic workup on 250- $\mu$ m diameter aluminium-supported silica gel TLC plates (MERCK TLC Plates). Note that we have done the chromatographic workup using TLC plates inside beakers which were filled with Ar before and after filling with properly distilled eluting solvents. Elution with a hexane/dichloromethane (70:30 v/v) mixture yielded dark green **1** (0.010 g, 12%) along with previously reported open 16-vertex *oblato-hypho*-titanaborane cluster [(Cp\*Ti)<sub>2</sub>B<sub>14</sub>H<sub>18</sub>]<sup>[5]</sup> (**III**) (0.019 g, 20%).

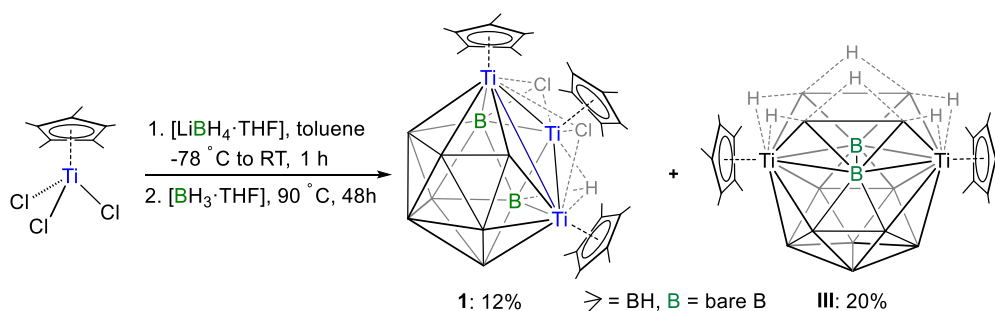

Scheme S1. Synthesis of **1**.

**1:** MS (ESI<sup>+</sup>): *m/z* calculated for [C<sub>30</sub>H<sub>53</sub>B<sub>9</sub>Cl<sub>2</sub>Ti<sub>3</sub> + H]<sup>+</sup>: 726.2956, found: 726.3257; <sup>11</sup>B{<sup>1</sup>H} NMR (160 MHz, CDCl<sub>3</sub>, 22 °C):  $\delta$  = 31.6 (br, 4B), 40.2 (br, 2B), 45.0 (br, 1B), 52.3 (br, 1B), 66.4 (br, 1B) ppm; <sup>11</sup>B NMR (160 MHz, CDCl<sub>3</sub>, 22 °C):  $\delta$  = 31.6 (d, <sup>1</sup>J<sub>B-H</sub> = 125 Hz, 4B), 40.3 (d, <sup>1</sup>J<sub>B-H</sub> = 127 Hz, 2B), 45.1 (d, <sup>1</sup>J<sub>B-H</sub> = 103 Hz, 1B), 52.3 (br, 1B), 66.4 (br, 1B) ppm; <sup>1</sup>H NMR (500 MHz,

CDCl<sub>3</sub>, 22 °C):  $\delta$  = -5.67 (br, 1H, Ti-H-B), 2.03 (s, 30H, 2Cp\*), 2.05 (s, 15H, 1Cp\*), 3.53 (br, B-Ht), 7.00 (br, B-Ht), 7.15 (br, B-Ht) ppm; <sup>13</sup>C{<sup>1</sup>H} NMR (125 MHz, CDCl<sub>3</sub>, 22 °C):  $\delta$  = 13.3 and 13.8 (C<sub>5</sub>Me<sub>5</sub>), 118.9 and 125.1 (C<sub>5</sub>Me<sub>5</sub>), ppm; IR (KBr, cm<sup>-1</sup>):  $\bar{\nu}$  = 2959, 2921, 2852, 2544 (B-H<sub>t</sub>), 1737, 1652, 1462, 1378, 1262, 1094, 1019, 865, 804, 741, 706; UV-Vis (CH<sub>2</sub>Cl<sub>2</sub>):  $\lambda$  = 230, 252, 455, 607 nm.

**Synthesis of 2:** In a flame-dried Schlenk tube, [(Cp\*TiCl<sub>3</sub>)] (0.100 g, 0.35 mmol) was suspended in 10 mL dry toluene and chilled to -78 °C. Then, a freshly prepared toluene solution of Li[BH<sub>3</sub>TePh] (3 equivalents, 1.05 mmol, in 10 mL) was transferred to it through a cannula. The reaction mixture was allowed to come to room temperature over 1 hour under stirring and thermolyzed at 80 °C for 18 h. After 1 hour, the mixture becomes brown and, after 18 h, changes to dark brown. After the completion of the reaction, the solvent was removed under vacuum. The residue was extracted with hexane/dichloromethane mixture (80:20 v/v) through a frit using 3 cm celite. The filtrate was concentrated, and the residue was subjected to chromatographic workup on 250- $\mu$ m diameter aluminium-supported silica gel TLC plates (MERCK TLC Plates). Elution with a hexane/dichloromethane (80:20 v/v) mixture yielded yellow **2** (0.024 g, 25%) along with a few unidentified air and moisture-sensitive products in low yields.

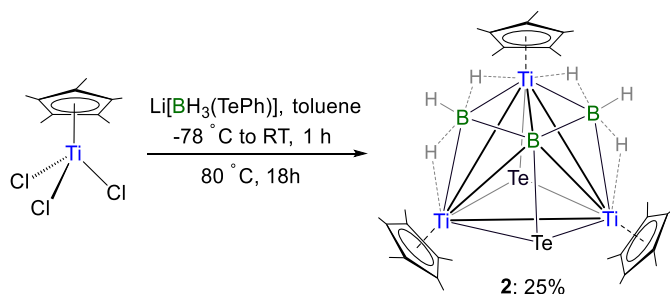

**Scheme S2.** Synthesis of **2**.

**2:** MS (ESI<sup>+</sup>):  $m/z$  calculated for [C<sub>30</sub>H<sub>51</sub>B<sub>3</sub>Te<sub>2</sub>Ti<sub>3</sub> + H]<sup>+</sup>: 845.0926, found: 845.1155; <sup>11</sup>B{<sup>1</sup>H} NMR (160 MHz, CDCl<sub>3</sub>, 22 °C):  $\delta$  = -7.7 (br, 2B, BH<sub>3</sub>), 54.0 (br, 1B, bare B) ppm; <sup>1</sup>H NMR (500 MHz, CDCl<sub>3</sub>, 22 °C):  $\delta$  = -2.79 (br, 4H, Ti-H-B), 2.04 (s, 15H, 1Cp\*), 2.09 (s, 30H, 2Cp\*), 2.36 (br, 2B, B-Ht) ppm; <sup>1</sup>H{<sup>11</sup>B} NMR (500 MHz, CDCl<sub>3</sub>, 22 °C):  $\delta$  = -2.80 (br, 4H, Ti-H-B), 2.04 (s, 15H, 1Cp\*), 2.09 (s, 30H, 2Cp\*), 2.39 (br, 2B, B-Ht) ppm; IR (KBr, cm<sup>-1</sup>):  $\bar{\nu}$  = 2959, 2925, 2871, 2492 (B-H<sub>t</sub>), 2083 (B-H<sub>b</sub>), 1648, 1452, 1378, 1259, 1094, 1063, 1021, 801, 738, 697; UV-Vis (CH<sub>2</sub>Cl<sub>2</sub>):  $\lambda$  = 230, 264, 346 nm.

**Synthesis of 3a and 3b:** In a flame-dried Schlenk tube, [(Cp\*TiCl<sub>3</sub>)] (0.100 g, 0.35 mmol) was suspended in 10 mL dry toluene and chilled to -78 °C. Then, a freshly prepared toluene solution of Li[BH<sub>3</sub>SePh] (3 equivalents, 1.05 mmol, in 10 mL) was transferred to it through a cannula. The reaction mixture was allowed to come to room temperature over 1 hour under stirring and thermolyzed at 80 °C for 18 h. After 1 h, the mixture becomes brown and, after 18 h, changes to dark brown. After the completion of the reaction, the solvent was removed under vacuum. The residue was extracted with hexane/dichloromethane mixture (80:20 v/v) through a frit using 3 cm celite. The filtrate was concentrated, and the residue was subjected to chromatographic workup on 250- $\mu$ m diameter aluminium-supported silica gel TLC plates (MERCK TLC Plates). Elution with a hexane/dichloromethane (80:20 v/v) mixture yielded yellow **3a** (0.025 g, 22%) and yellow **3b** (0.022 g, 17%).

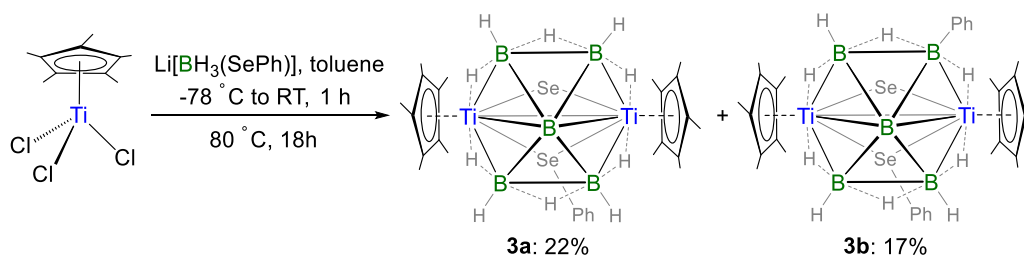

**Scheme S3.** Synthesis of **3a** and **3b**.

**3a:** MS (ESI<sup>+</sup>):  $m/z$  calculated for  $[C_{26}H_{45}B_5Se_2Ti_2 - BH_2]^+$ : 653.1080, found: 653.1082;  $^{11}B\{^1H\}$  NMR (160 MHz,  $CDCl_3$ , 22 °C):  $\delta = -2.2$  (br, 2B,  $BH_3$ ), 0.8 (br, 2B,  $BH_3$ ), 51.3 (br, 1B, bare B) ppm;  $^{11}B$  NMR (160 MHz,  $CDCl_3$ , 22 °C):  $\delta = -2.4$  (br, 2B,  $BH_3$ ), 0.4 (br, 2B,  $BH_3$ ), 51.3 (br, 1B, bare B) ppm;  $^1H$  NMR (500 MHz,  $CDCl_3$ , 22 °C):  $\delta = -2.34$  (br, 1H, Ti- $H$ -B), -1.73 (br, 2H, Ti- $H$ -B), -0.77 (br, 1H, Ti- $H$ -B), -0.54 (br, 2H, B- $H$ -B), 2.01 (br, 2H, B- $H$ -t), 2.23 (s, 30H, 2Cp\*), 2.94 (br, 2H, B- $H$ -t), 7.28-7.56 (m, 5H, Ph) ppm;  $^1H\{^{11}B\}$  NMR (500 MHz,  $CDCl_3$ , 22 °C):  $\delta = -2.35$  (br, 1H, Ti- $H$ -B), -1.75 (br, 2H, Ti- $H$ -B), -0.79 (br, 1H, Ti- $H$ -B), -0.54 (br, 2H, B- $H$ -B), 1.87 (br, 2H, B- $H$ -t), 2.23 (s, 30H, 2Cp\*), 2.72 (br, 2H, B- $H$ -t), 7.28-7.56 (m, 5H, Ph) ppm;  $^{13}C\{^1H\}$  NMR (125 MHz,  $CDCl_3$ , 22 °C):  $\delta = 14.1$  ( $C_5Me_5$ ), 123.0 ( $C_5Me_5$ ), 127.7-133.2 ( $C_6H_5$ ) ppm;  $^{77}Se$  NMR (95 MHz,  $CDCl_3$ , 22 °C):  $\delta = 346.9$  ( $\mu$ -Se), 527.3 ( $\mu$ -SePh) ppm; IR (KBr,  $cm^{-1}$ ):  $\bar{\nu} = 2961, 2921, 2852, 2503$  (B- $H_t$ ), 2124 (B- $H_b$ ), 1645, 1473, 1432, 1128, 1092, 1065, 1019, 799, 731, 688; UV-Vis ( $CH_2Cl_2$ ):  $\lambda = 230, 248, 276, 364$  nm.

**3b:** MS (ESI<sup>+</sup>):  $m/z$  calculated for  $[C_{32}H_{49}B_5Se_2Ti_2]^+$ : 742.1651, found: 742.1716;  $^{11}B\{^1H\}$  NMR (160 MHz,  $CDCl_3$ , 22 °C):  $\delta = -0.3$  (br, 1B,  $BH_3$ ), 1.4 (br, 2B,  $BH_3$ ), 5.2 (br, 1B,  $BH_2Ph$ ), 50.6 (br, 1B, bare B) ppm;  $^{11}B$  NMR (160 MHz,  $CDCl_3$ , 22 °C):  $\delta = 1.3$  (br, 3B,  $BH_3$ ), 5.3 (br, 1B,  $BH_2Ph$ ), 50.6 (br, 1B, bare B) ppm;  $^1H$  NMR (500 MHz,  $CDCl_3$ , 22 °C):  $\delta = -1.62$  (br, 1H, Ti- $H$ -B), -1.08 (br, 1H, Ti- $H$ -B), -0.59 (br, 2H, Ti- $H$ -B), -0.19 (br, 2H, B- $H$ -B), 1.92 (br, 2H, B- $H$ -t), 2.14 (s, 15H, 1Cp\*), 2.23 (s, 15H, 1Cp\*), 3.20 (br, 2H, B- $H$ -t), 7.06-7.59 (m, 10H, Ph) ppm;  $^1H\{^{11}B\}$  NMR (500 MHz,  $CDCl_3$ , 22 °C):  $\delta = -1.62$  (br, 1H, Ti- $H$ -B), -1.08 (br, 1H, Ti- $H$ -B), -0.59 (br, 2H, Ti- $H$ -B), -0.26 (br, 1H, B- $H$ -B), -0.14 (br, 1H, B- $H$ -B), 1.93 (br, 2H, B- $H$ -t), 2.14 (s, 15H, 1Cp\*), 2.23 (s, 15H, 1Cp\*), 3.10 (br, 2H, B- $H$ -t), 7.05-7.59 (m, 10H, Ph) ppm;  $^{13}C\{^1H\}$  NMR (125 MHz,  $CDCl_3$ , 22 °C):  $\delta = 14.1$  and 14.2 ( $2C_5Me_5$ ), 122.9 and 123.0 ( $2C_5Me_5$ ), 126.9-135.1 ( $2C_6H_5$ ) ppm;  $^{77}Se$  NMR (95 MHz,  $CDCl_3$ , 22 °C):  $\delta = 293.7$  ( $\mu$ -Se), 540.5 ( $\mu$ -SePh) ppm; IR (KBr,  $cm^{-1}$ ):  $\bar{\nu} = 2963, 2929, 2854, 2500$  (B- $H_t$ ), 2088 (B- $H_b$ ), 1643, 1262, 1094, 1021, 867, 799, 692; UV-Vis ( $CH_2Cl_2$ ):  $\lambda = 230, 250, 269, 317, 366$  nm.

### I.1 UV-visible Studies

In order to investigate the optical properties of these coloured metallaborane clusters **1**, **2**, **3a**, and **3b**, we have carried out UV-vis study in  $CH_2Cl_2$  solution. The UV-vis absorption spectra of all the complexes were measured in the range of 200-800 nm in  $CH_2Cl_2$  solution at 298 K (Figures S38). All of them display the most intense peaks at higher energy regions 230-276 nm due to the  $\pi$ - $\pi^*$  transition of Cp\* ligands, characteristic bands for most Cp\* based metal complexes.<sup>[6]</sup> The absorptions with  $\lambda > 300$  nm exhibit mainly two to three absorption bands. These comparatively low energy bands, around 317-607 nm, have been assigned to the charge transfer bands.<sup>[7-9]</sup> To reproduce the UV-vis spectrum and get some idea about the electronic transitions, Time-Dependent DFT formalism was used (Figures S49-S56, Tables S6-S9). The studies show that the absorption in the range of 317-607 nm may be assigned to the electronic transitions that correspond to electron density flow from the boron moieties or chalcogen atoms to the metal centers.

I.2 Supplementary Data

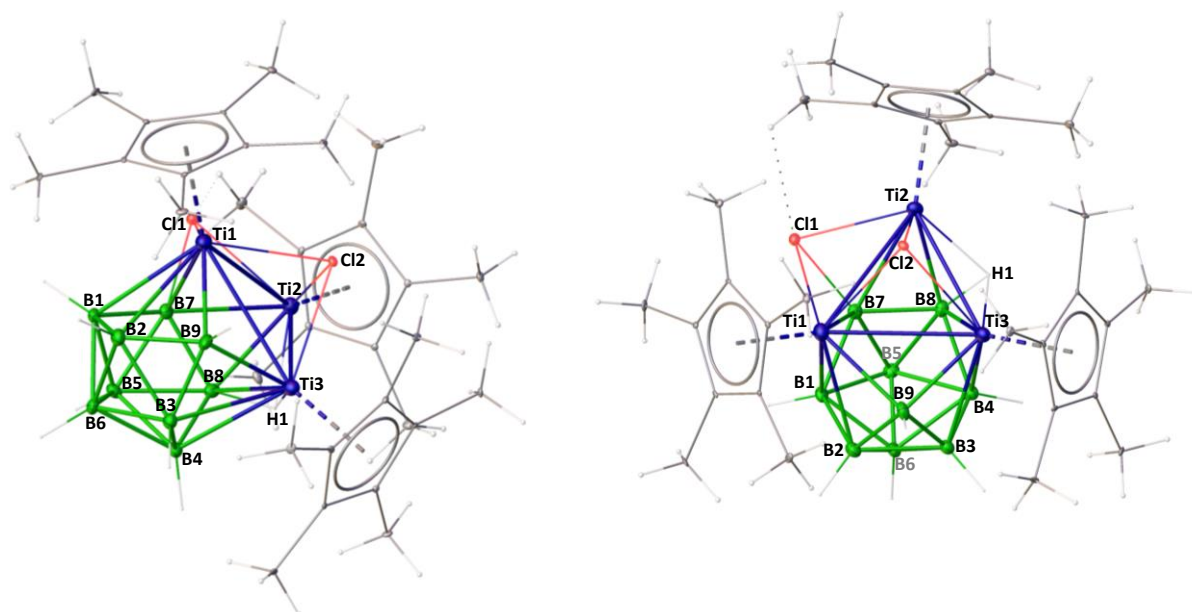

**Figure S1.** Molecular structure and labelling diagram of **1**. Side view (left); top view (right). Selected bond lengths (Å) and bond angles (°): Ti-Ti3 3.073(3), Ti1-B1 2.513(16), Ti1-B9 2.174(15), B2-B9 1.61(2), B7-Cl1 1.854(19), Ti1-Cl1 2.543(5), B8-H1 1.19(3), Ti2-H1 1.95(13), Ti1-Ti2-Ti3 58.01(7), Ti1-B9-Ti3 91.3(6).

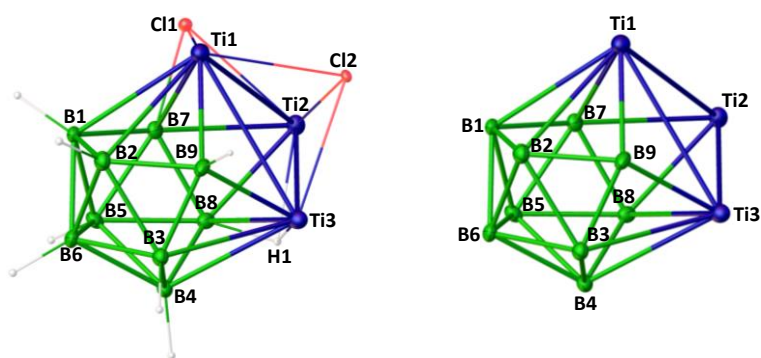

**Figure S2.** Icosahedron core  $[Ti_3B_9]$  of **1** with bridging ligands (left) and icosahedron core  $[Ti_3B_9]$  of **1** (right).



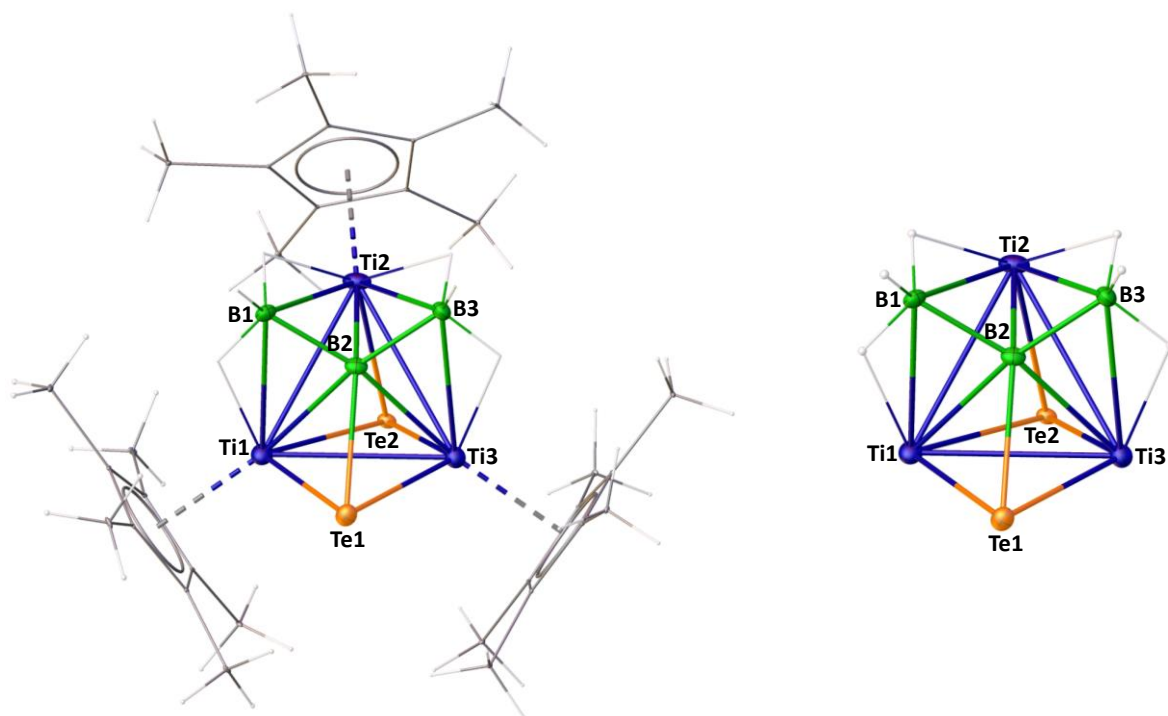

**Figure S3.** Molecular structure and labelling diagram of **2** (left). Selected bond lengths (Å) and angles (°) in **2**: Ti-Ti3 3.073(3), Ti1-B1 2.513(16), Ti1-B9 2.174(15), B2-B9 1.61(2), B7-Cl1 1.854(19), Ti1-Cl1 2.543(5), B8-H1 1.19(3), Ti2-H1 1.95(13), Ti1-Ti2-Ti3 58.01(7), Ti1-B9-Ti3 91.3(6). Tetracapped tetrahedron  $[\text{Ti}_3\text{B}_3\text{Te}_2]$  core of **1** with bridging ligands (right).

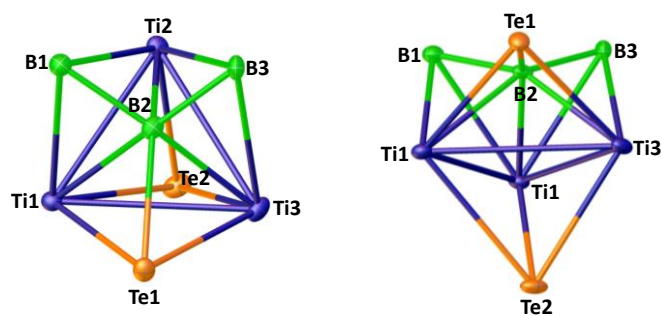

**Figure S4.** Tetracapped tetrahedron  $[\text{Ti}_3\text{B}_3\text{Te}_2]$  core of **2**. Side view (left); top view (right).

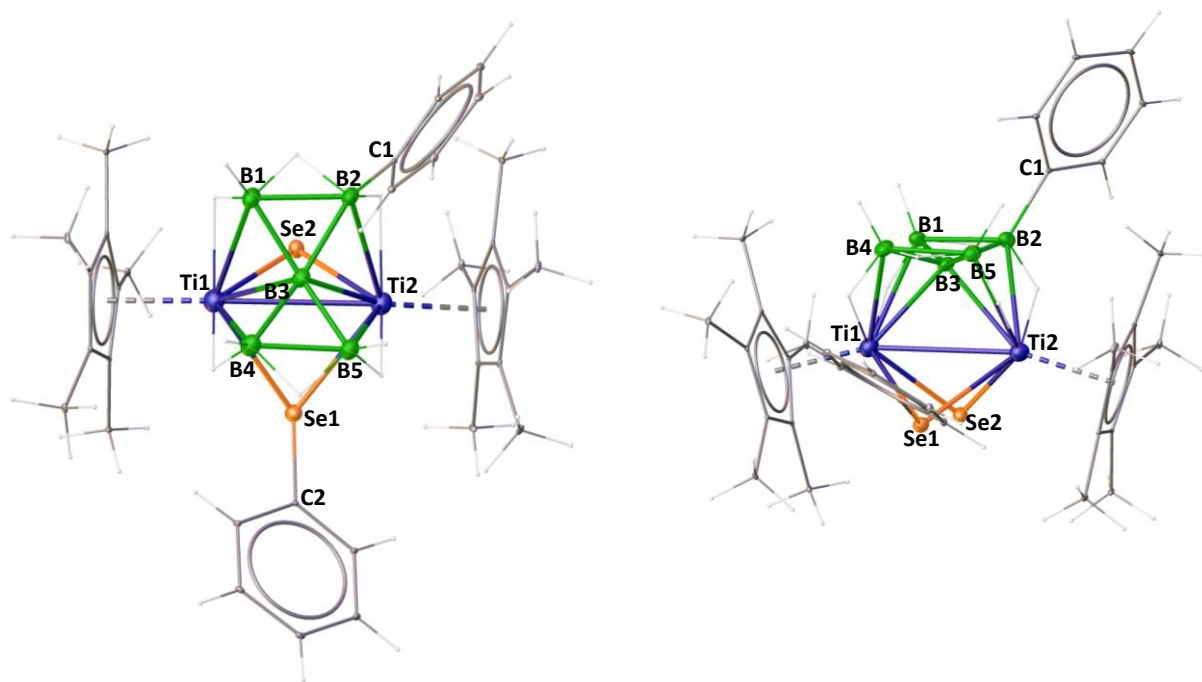

**Figure S5.** Molecular structure and labelling diagram of **3b**. Side view (left); top view (right). Selected bond lengths (Å) and bond angles (°): Ti1-Ti2 3.0281(7), Ti1-B3 2.271(4), B1-B2 1.784(5), Ti1-B3-Ti2 84.03(12).

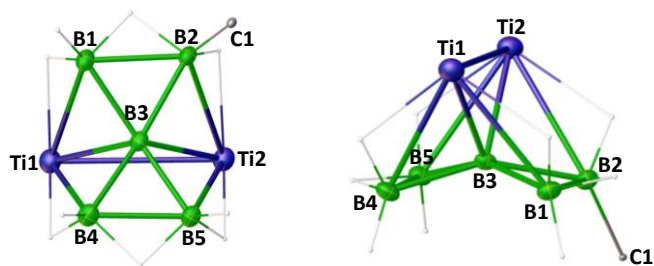

**Figure S6.**  $[Ti_3B_3Te_2]$  core of **3b** with bridging ligands. Top view (left); side view (right).

### I.3 Spectroscopic Details

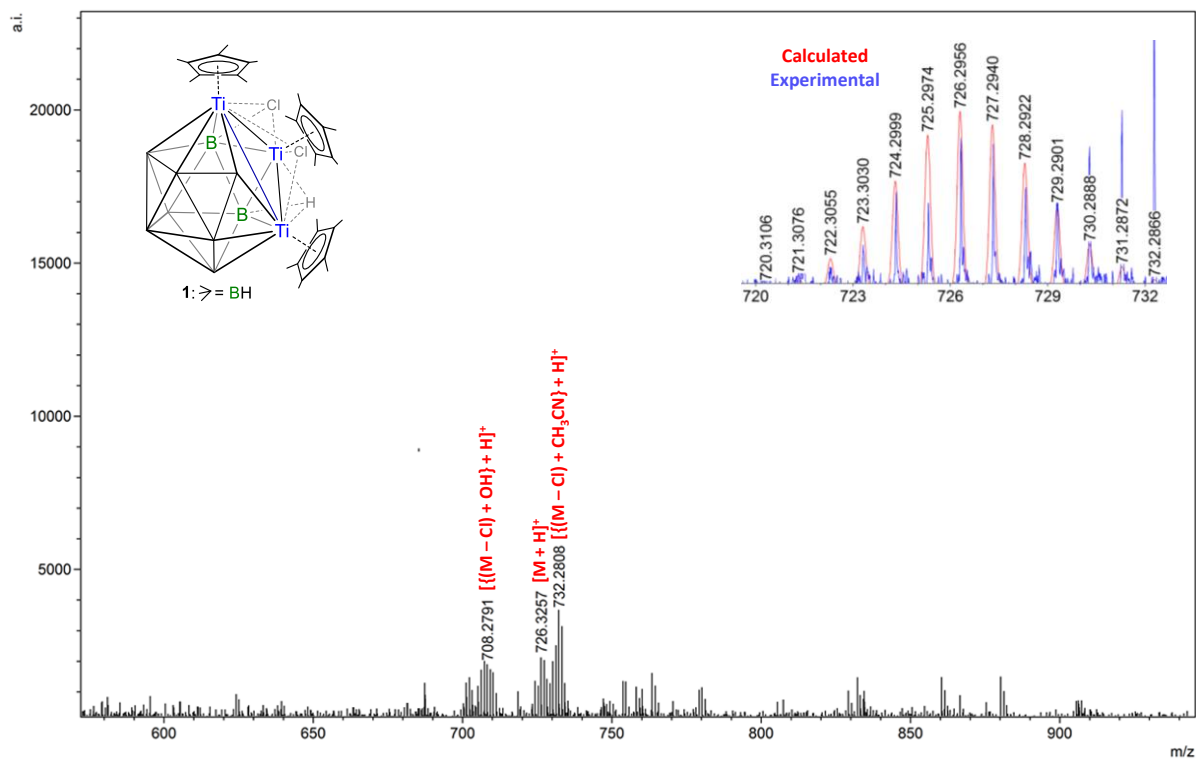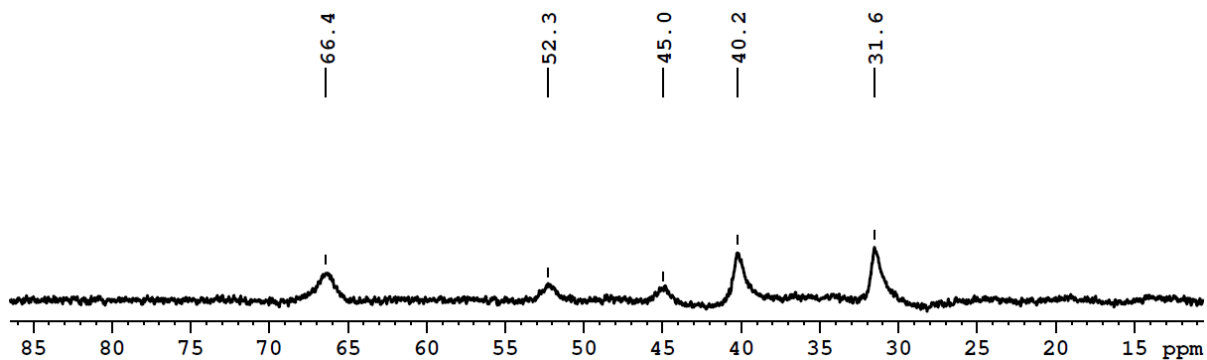

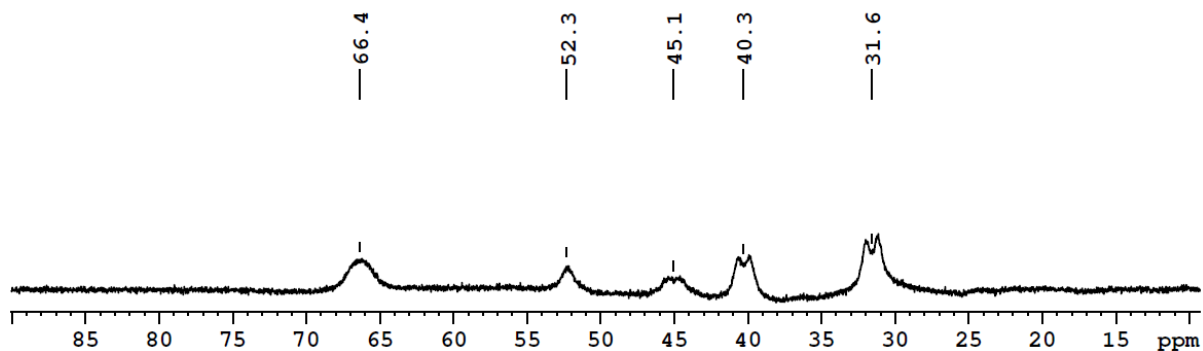

**Figure S9.**  $^{11}\text{B}$  NMR spectrum of **1** in  $\text{CDCl}_3$ .<sup>[4]</sup> Note that the chemical shifts observed at  $\delta = 31.6$  and  $40.3$  ppm correspond to a set of four boron atoms (B1, B2, B3, and B4; Figure S1) and two boron atoms (B5 and B6; Figure S1), respectively. These boron atoms are bound to terminal hydrogen atoms. The resonance at  $\delta = 45.1$  ppm is assigned to the B8 atom, which is connected to bridging hydrogen atoms, resulting in a very weak doublet. No splitting is observed for the  $\delta = 52.3$  ppm signal, as the corresponding boron atom (B7) is bonded to a chlorine atom. Additionally, the chemical shift at  $\delta = 66.4$  ppm corresponds to the B9 boron atom appearing broadened, likely due to the quadrupole moment of the  $^{11}\text{B}$  nuclei.

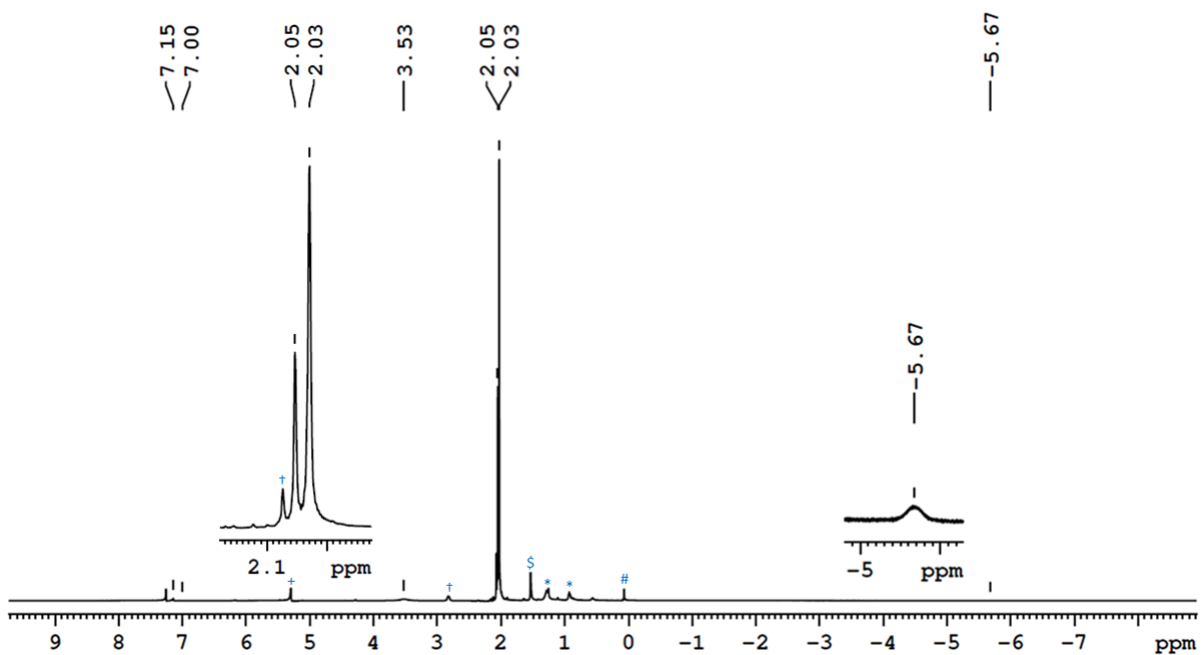

**Figure S10.**  $^1\text{H}$  NMR spectrum of **1** in  $\text{CDCl}_3$  (+Inseparable impurity, \$ $\text{H}_2\text{O}$ , \*Grease, #Silicon grease).

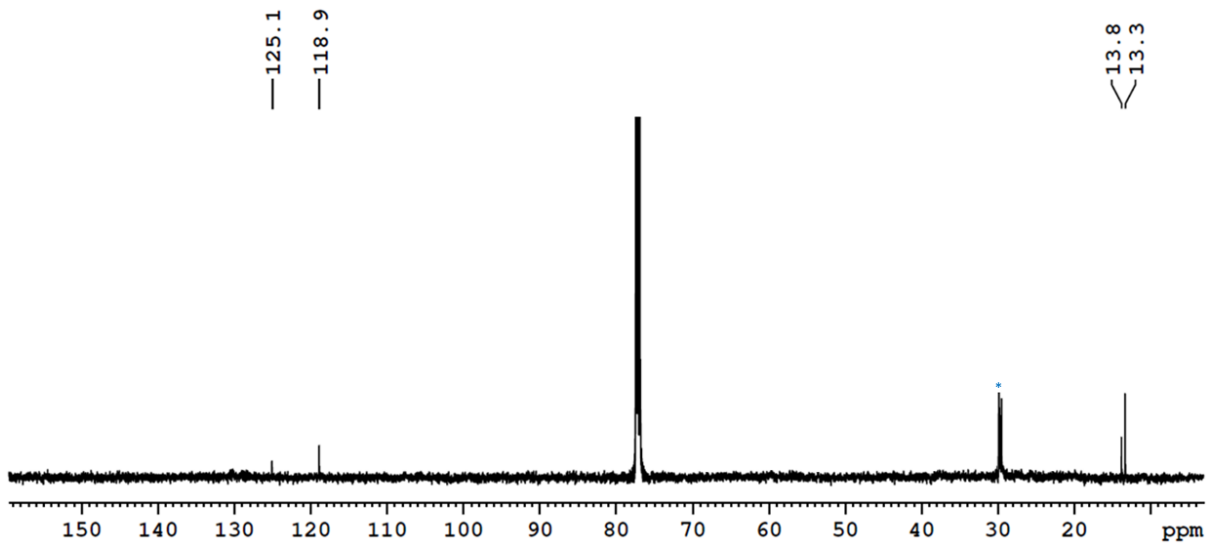

Figure S11.  $^{13}\text{C}\{^1\text{H}\}$  NMR spectrum of **1** in  $\text{CDCl}_3$  (\*Grease).

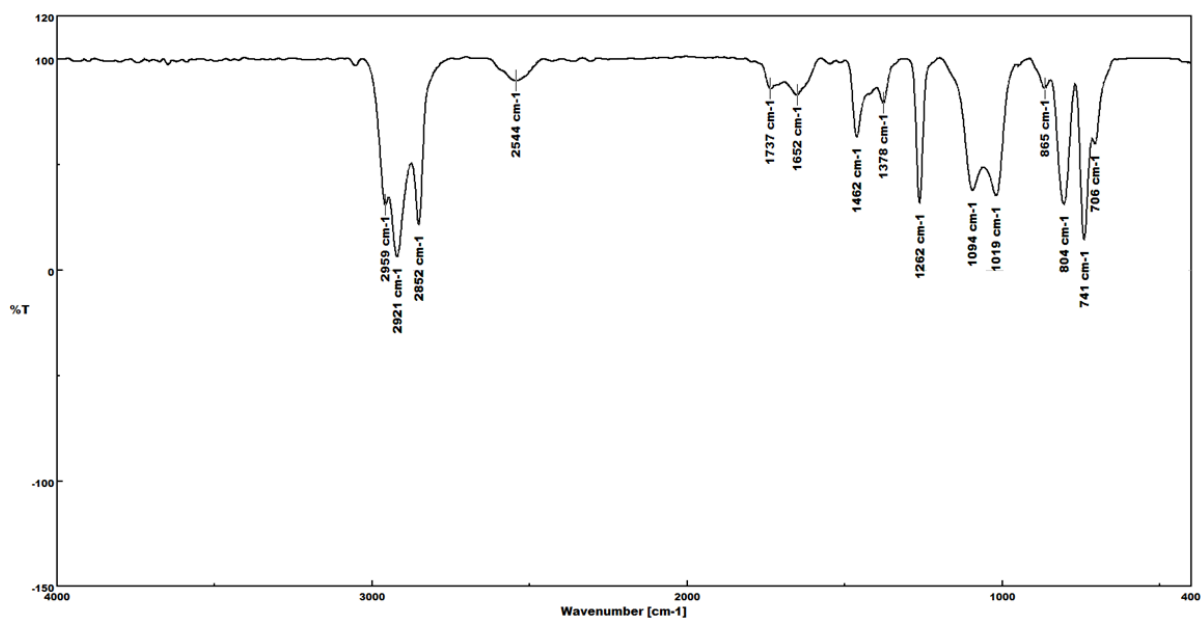

Figure S12. IR spectrum of **1**.

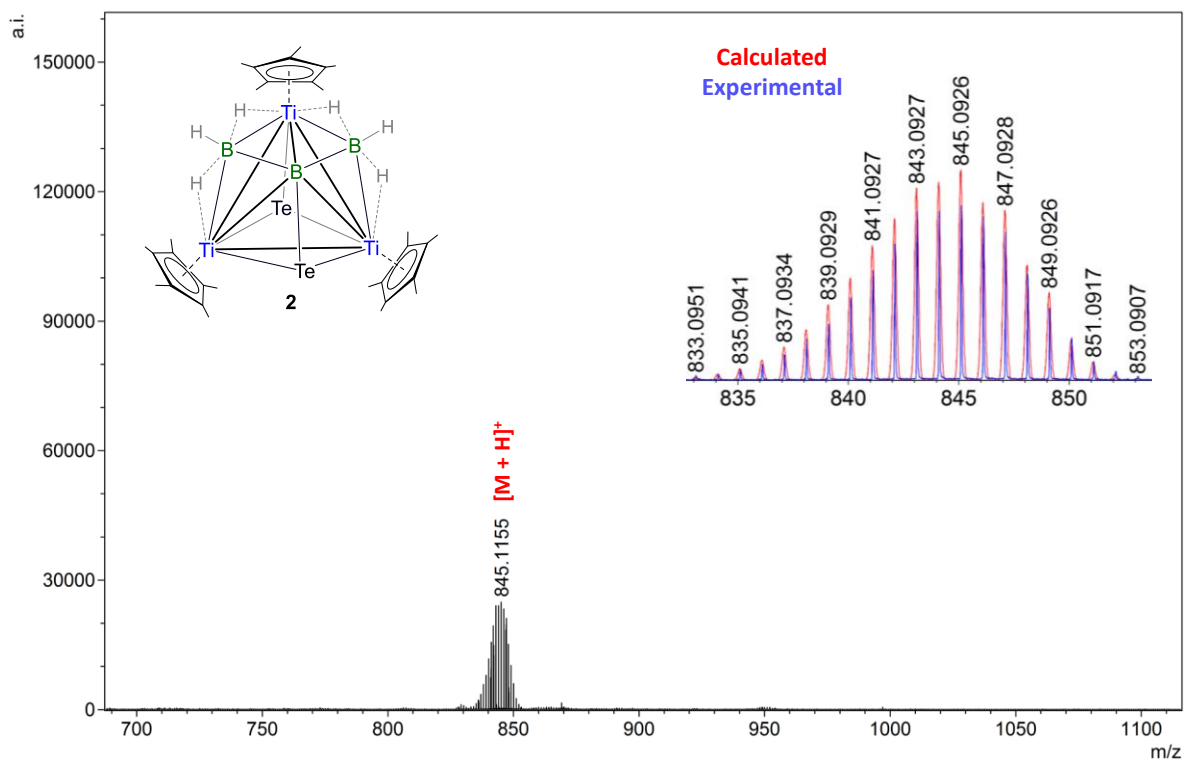

Figure S13. ESI-MS spectrum of **2**.

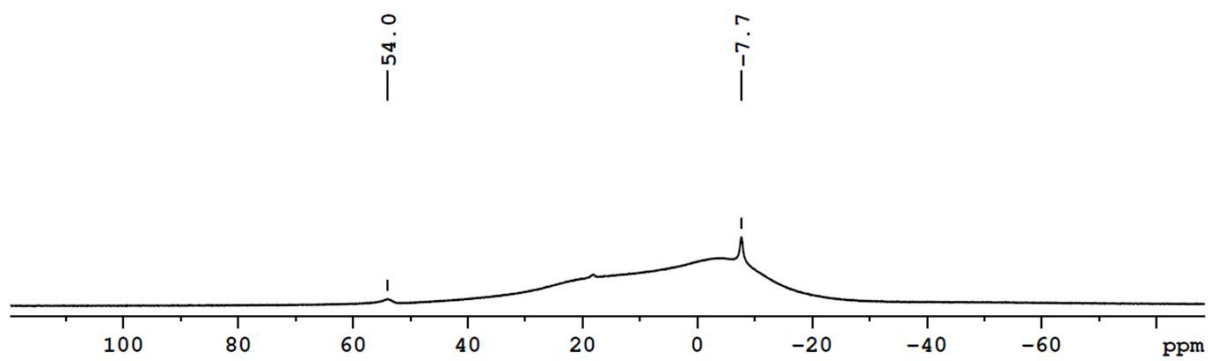

Figure S14.  $^{11}\text{B}\{^1\text{H}\}$  NMR spectrum of **2** in  $\text{CDCl}_3$ .

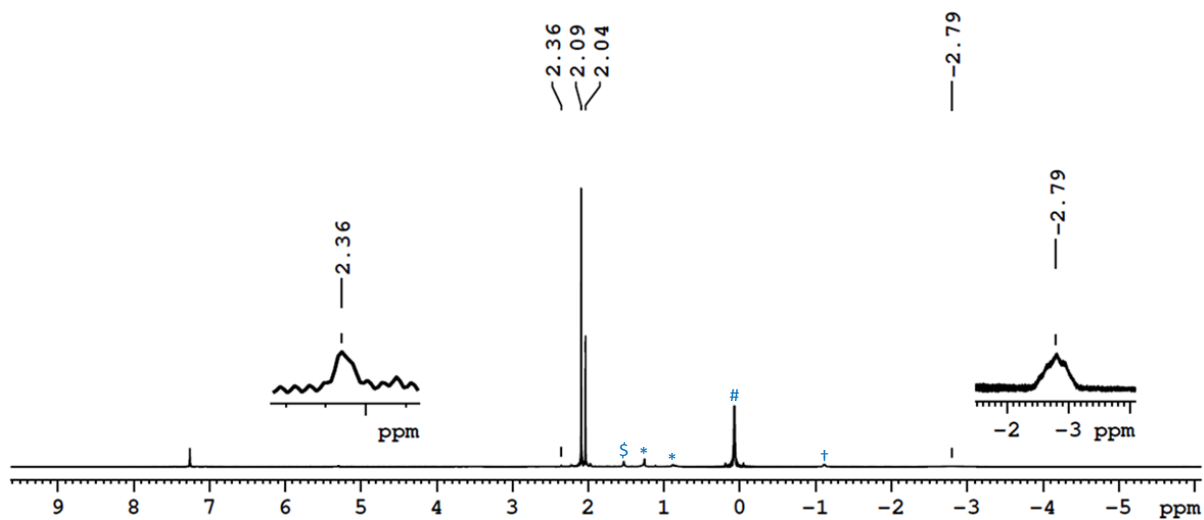

Figure S15.  $^1\text{H}$  NMR spectrum of **2** in  $\text{CDCl}_3$  (§ $\text{H}_2\text{O}$ , \*Grease, #Silicon grease, †Inseparable impurity).

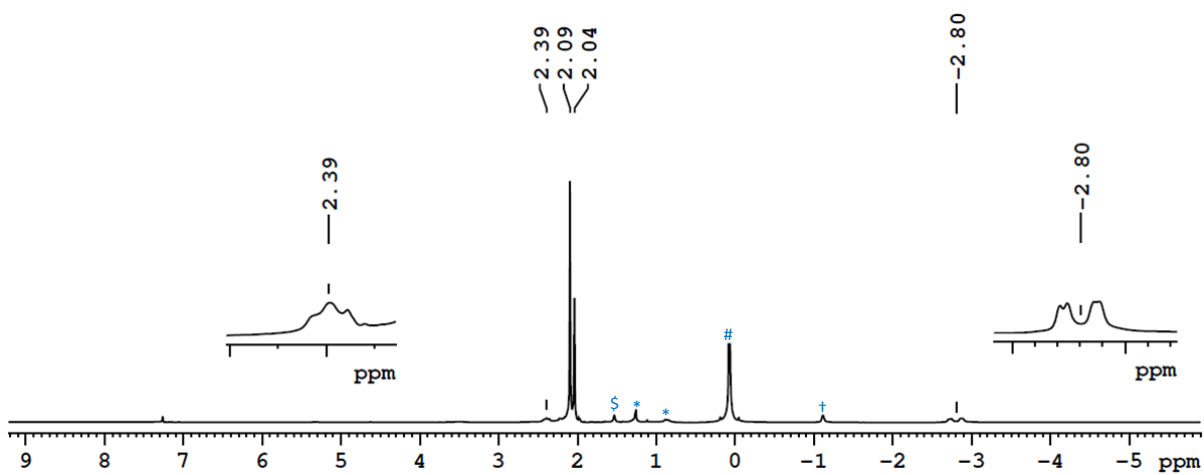

Figure S16.  $^1\text{H}\{^{11}\text{B}\}$  NMR spectrum of **2** in  $\text{CDCl}_3$  (§ $\text{H}_2\text{O}$ , \*Grease, #Silicon grease, †Inseparable impurity).

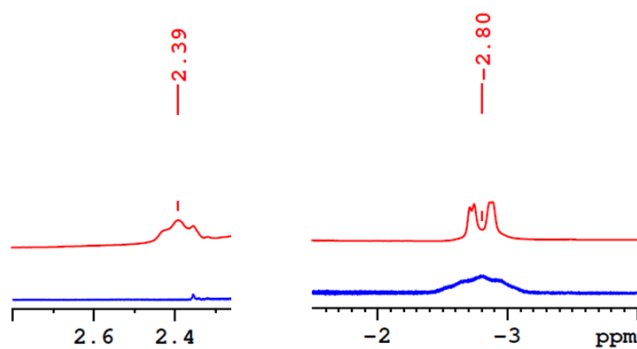

Figure S17. Stacked  $^1\text{H}$  (bottom) and  $^1\text{H}\{^{11}\text{B}\}$  NMR (top) spectra of **2** in  $\text{CDCl}_3$ .

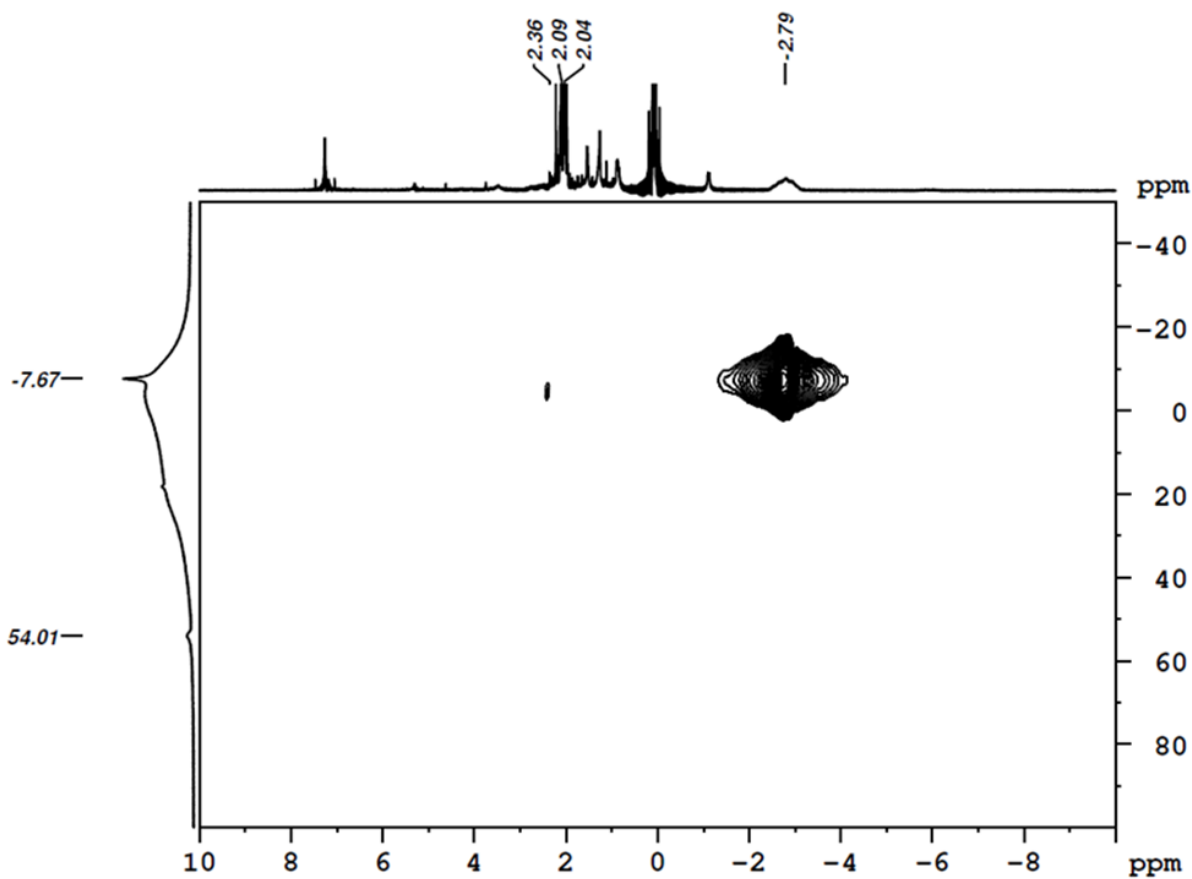

Figure S18.  $^1\text{H}$ - $^{11}\text{B}$  HSQC NMR spectrum of **2** in  $\text{CDCl}_3$ .

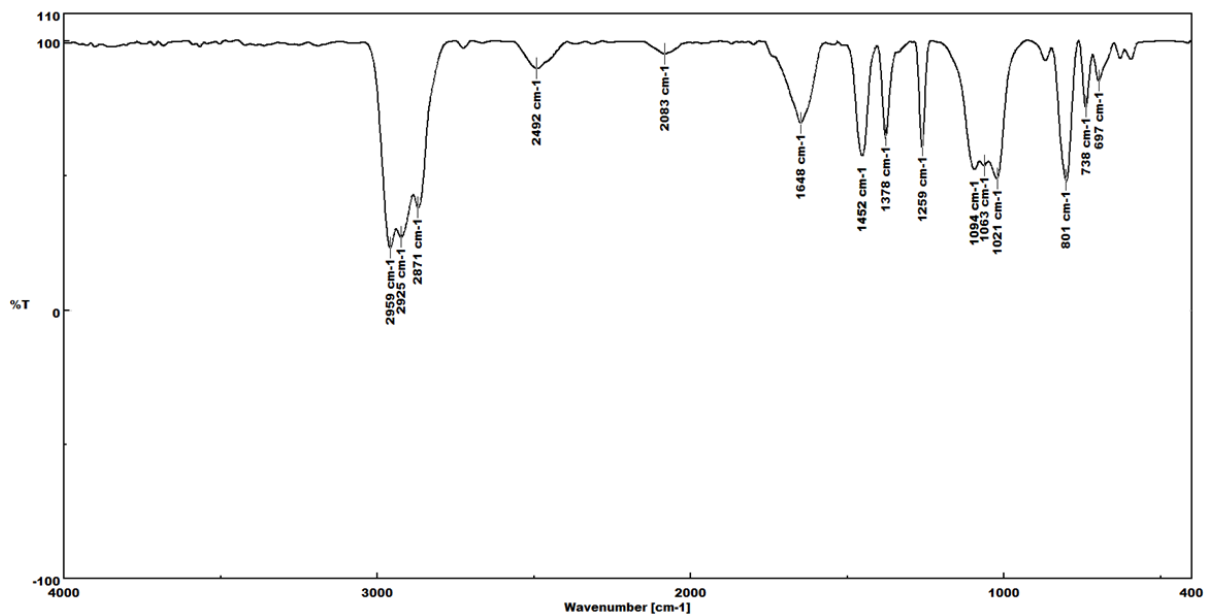

Figure S19. IR spectrum of **2**.



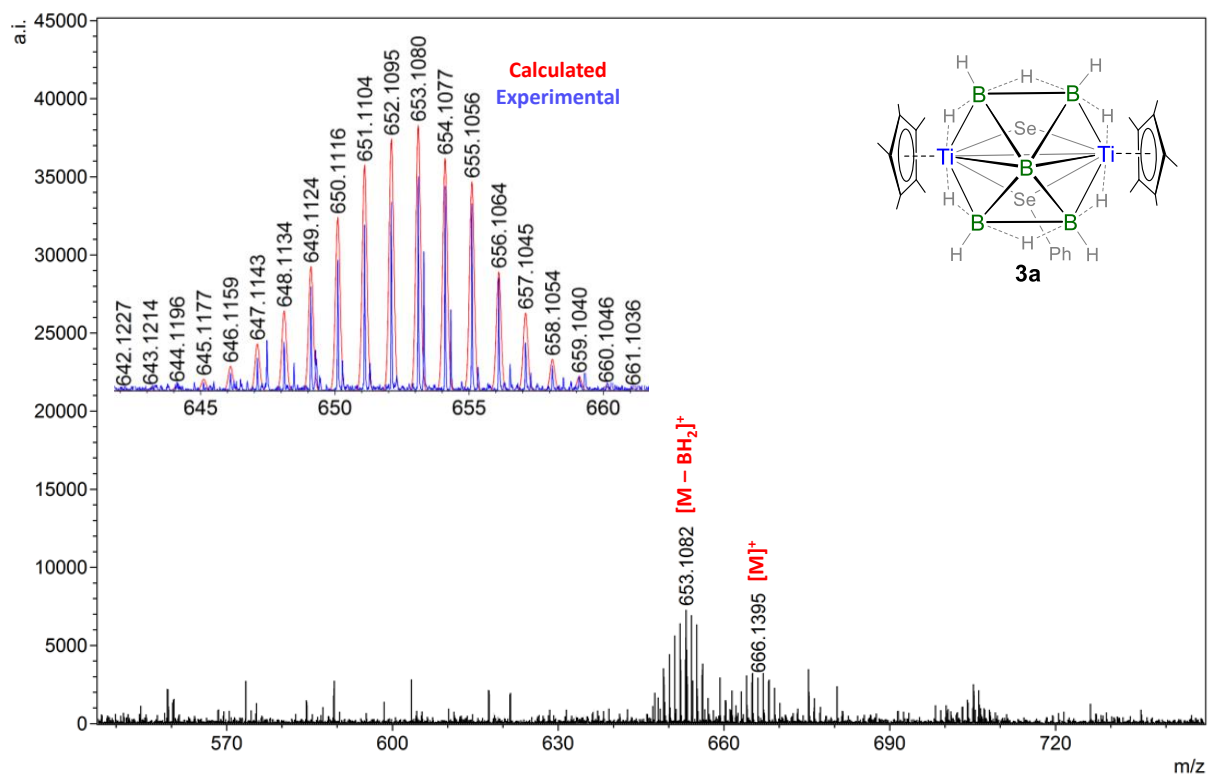

Figure S20. ESI-MS spectrum of **3a**.

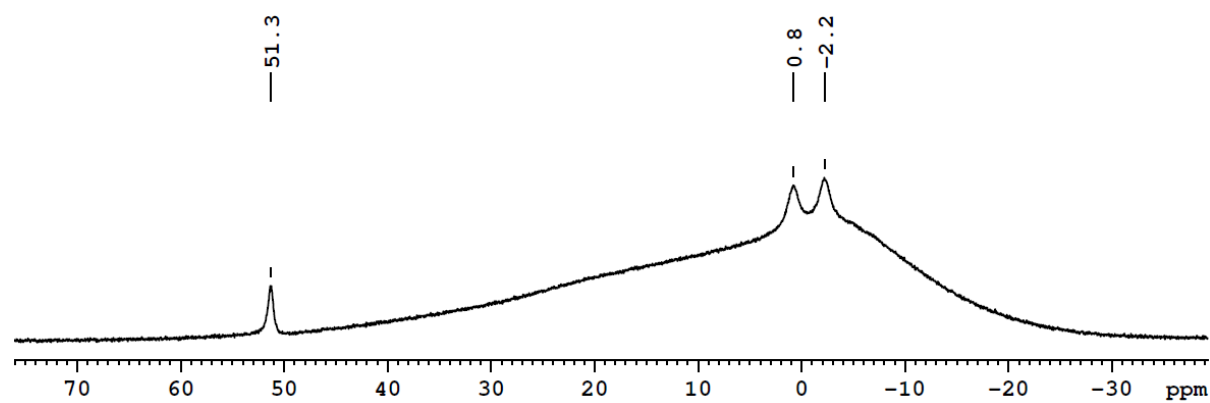

Figure S21.  $^{11}B\{^1H\}$  NMR spectrum of **3a** in  $CDCl_3$ .

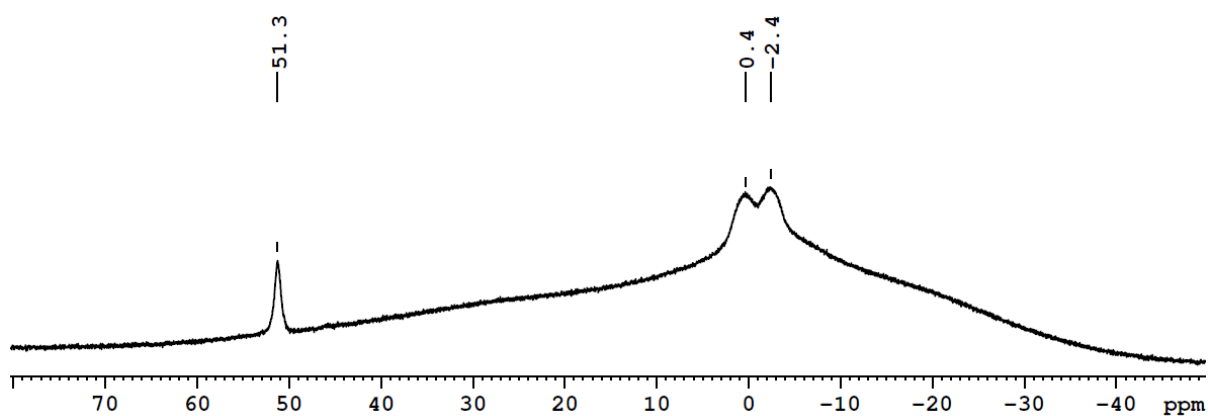

**Figure S22.**  $^{11}\text{B}$  NMR spectrum of **3a** in  $\text{CDCl}_3$ . Note that the chemical shifts observed at  $\delta = -2.4$  and  $0.4$  ppm correspond to two sets of  $\text{BH}_3$  boron atoms, which are bonded to the terminal and bridging hydrogen atoms (however, instead of splitting, broadened signals observed). The resonance at  $\delta = 51.3$  ppm is attributed to the bare boron atom and exhibits no splitting or broadening.

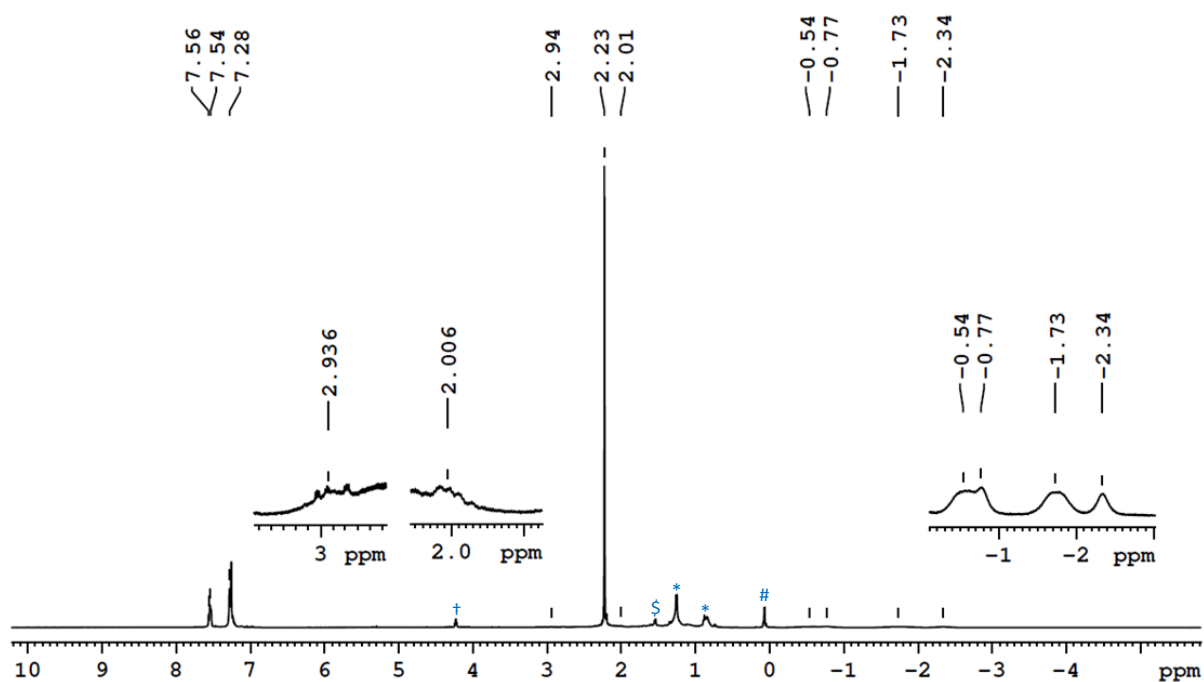

**Figure S23.**  $^1\text{H}$  NMR spectrum of **3a** in  $\text{CDCl}_3$  (+Inseparable impurity, \$ $\text{H}_2\text{O}$ , \*Grease, #Silicon grease).

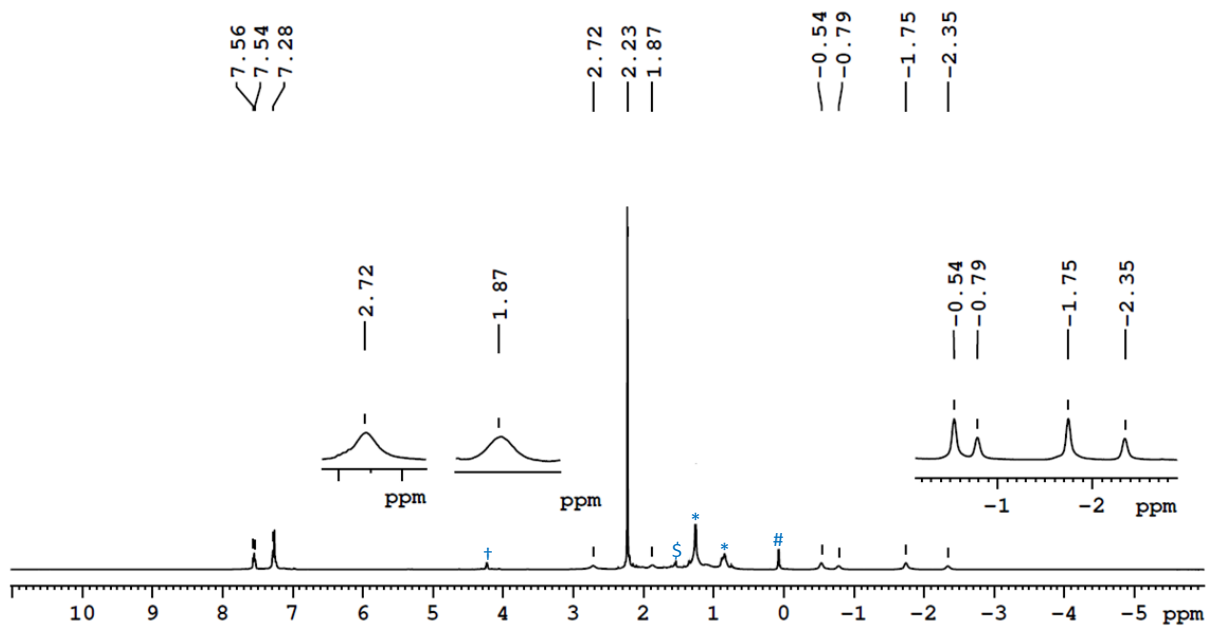

Figure S24.  $^1\text{H}\{^{11}\text{B}\}$  NMR spectrum of **3a** in  $\text{CDCl}_3$  (†Inseparable impurity, § $\text{H}_2\text{O}$ , \*Grease, #Silicon grease).

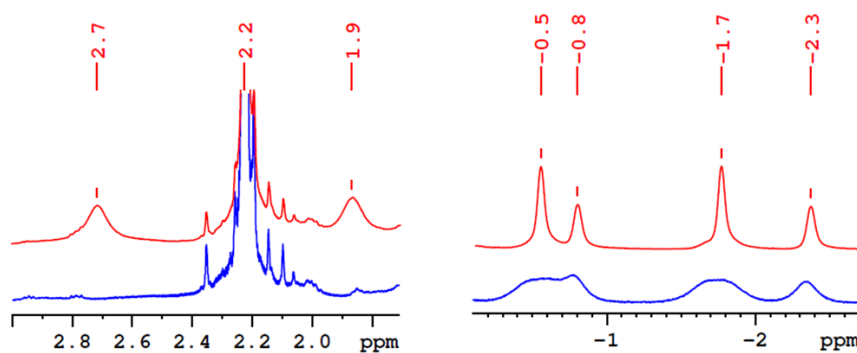

Figure S25. Stacked  $^1\text{H}$  (bottom) and  $^1\text{H}\{^{11}\text{B}\}$  NMR (top) spectra of **3a** in  $\text{CDCl}_3$ .

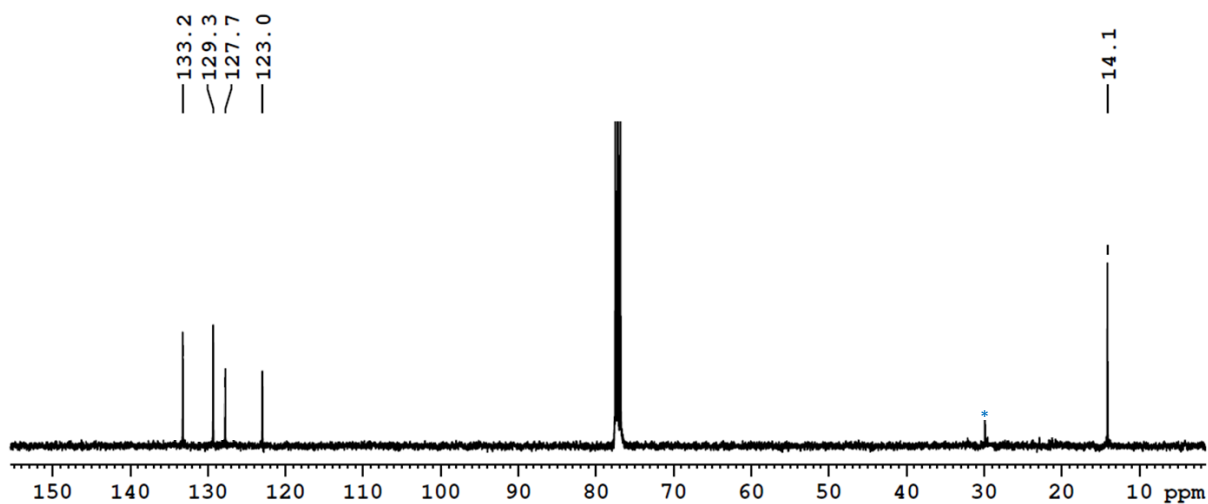

Figure S26.  $^{13}\text{C}\{^1\text{H}\}$  NMR spectrum of **3a** in  $\text{CDCl}_3$  (\*Grease).

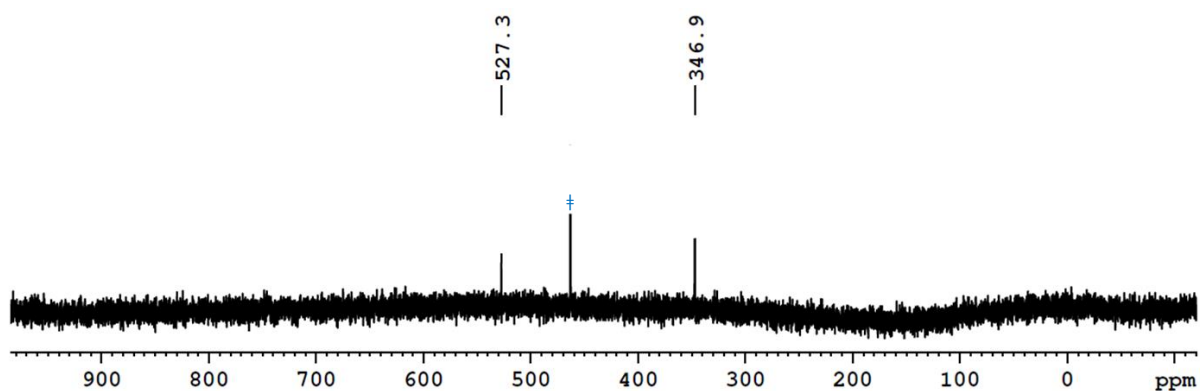

**Figure S27.**  $^{77}\text{Se}$  NMR spectrum of **3a** in  $\text{CDCl}_3$  († Peak at  $\delta = 463$  ppm is due to the presence of  $\text{Se}_2\text{Ph}_2$  as external reference).

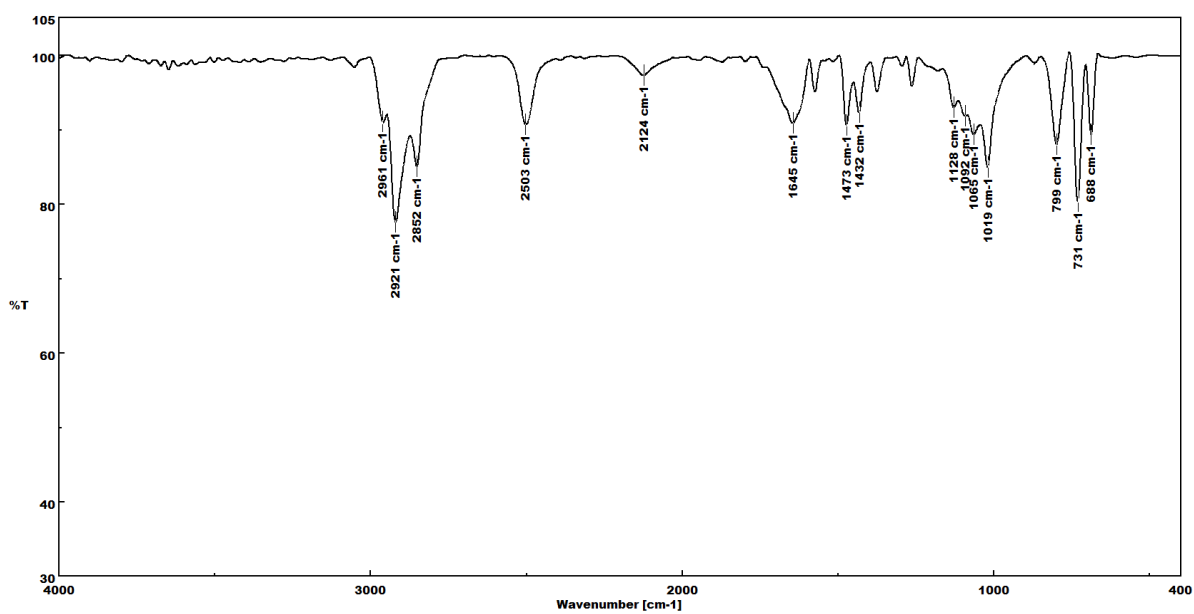

**Figure S28.** IR spectrum of **3a**.

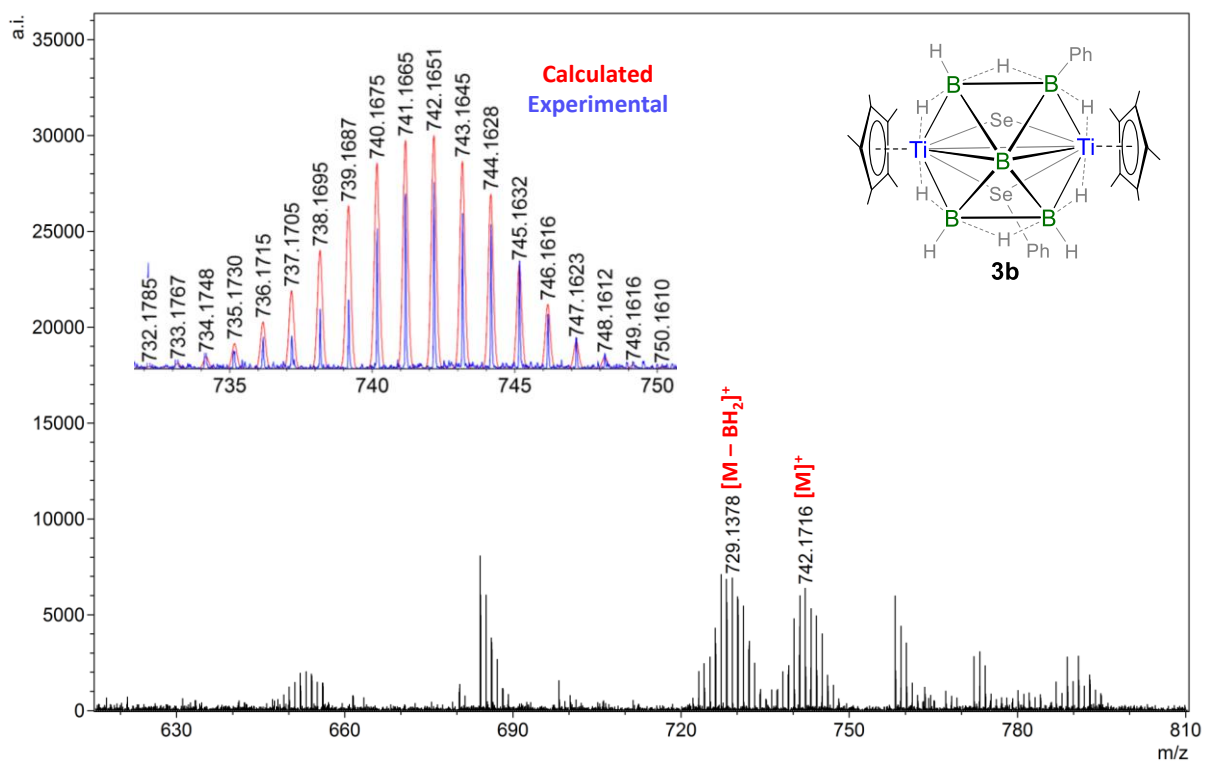

Figure S29. ESI-MS spectrum of **3b**.

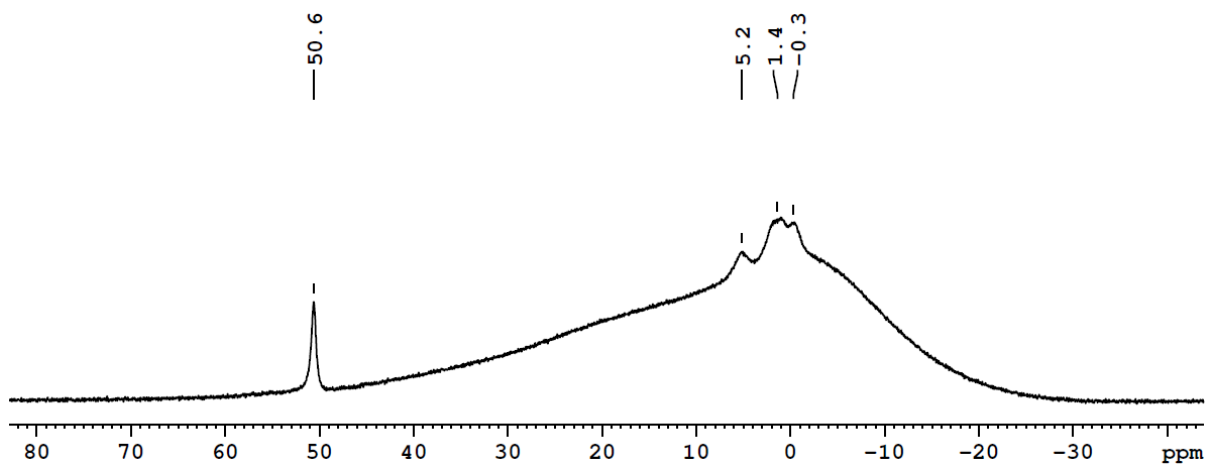

Figure S30.  $^{11}\text{B}\{^1\text{H}\}$  NMR spectrum of **3b** in  $\text{CDCl}_3$ .

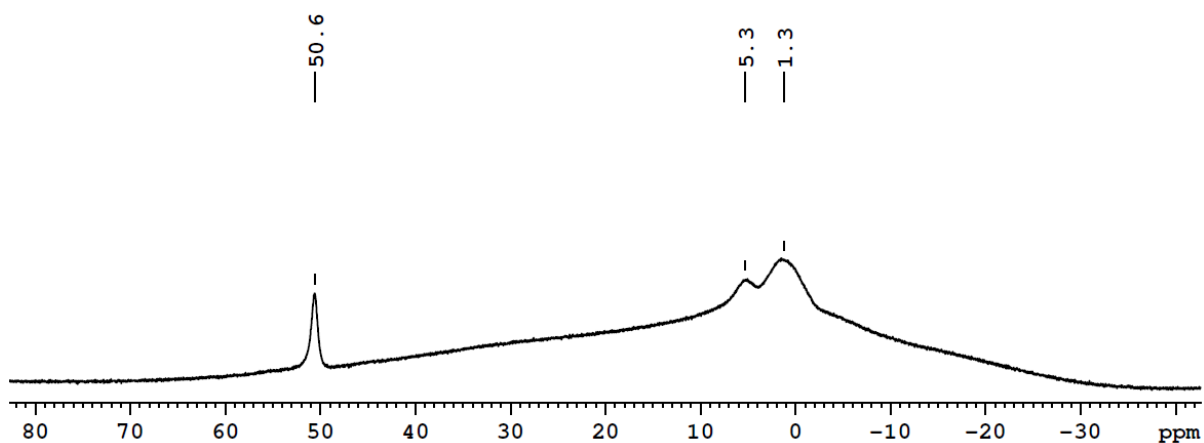

**Figure S31.**  $^{11}\text{B}$  NMR spectrum of **3b** in  $\text{CDCl}_3$ . The chemical shift observed at  $\delta = 1.3$  ppm corresponds to two sets of  $\text{BH}_3$  boron atoms bonded to the terminal and bridging hydrogen atoms. These two sets of  $\text{BH}_3$  signals represent two inequivalent boron atoms in a 1:2 ratio in  $^1\text{H}\{^{11}\text{B}\}$  NMR spectrum and appear merged in  $^{11}\text{B}$  NMR due to the broadening of the signals. The resonance at  $\delta = 5.3$  ppm is assigned to the  $\text{BH}_2\text{Ph}$  boron atom, which is connected to bridging hydrogen atoms. This signal appears broadened, likely due to the quadrupole moment of the  $^{11}\text{B}$  nuclei. Additionally, the resonance at  $\delta = 50.6$  ppm is attributed to the bare boron atom, which exhibits no splitting or broadening.

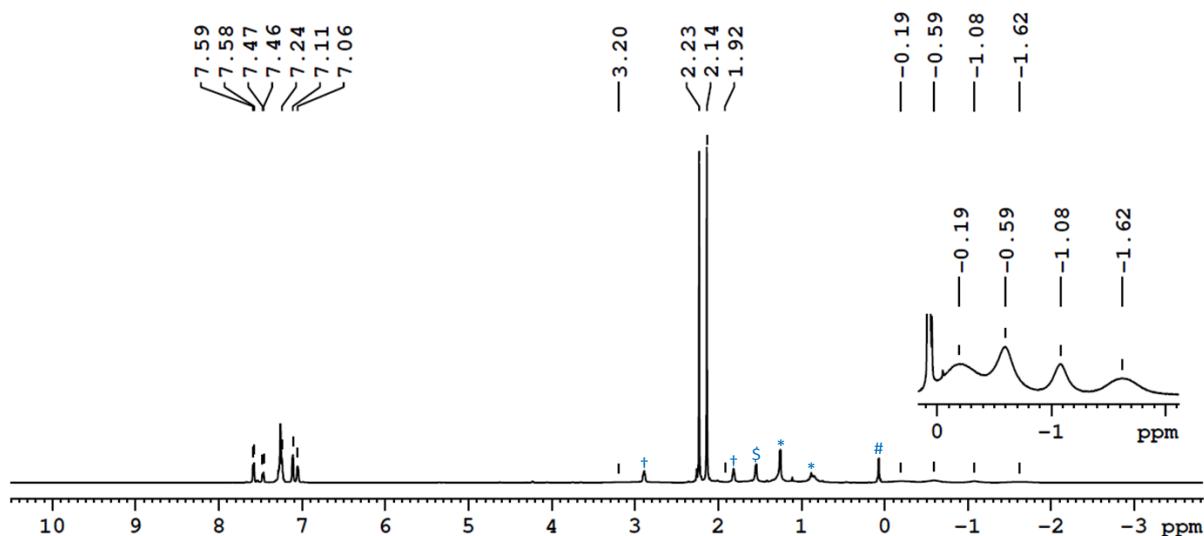

**Figure S32.**  $^1\text{H}$  NMR spectrum of **3b** in  $\text{CDCl}_3$  ( $\dagger$ Inseparable impurity,  $\S$  $\text{H}_2\text{O}$ ,  $*$ Grease,  $\#$ Silicon grease).

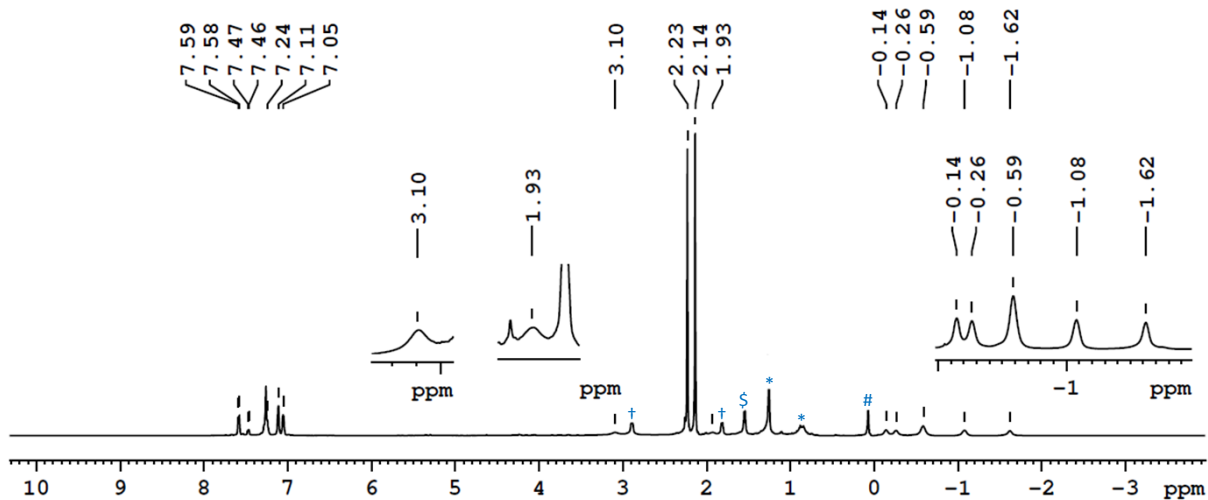

Figure S33.  $^1\text{H}\{^{11}\text{B}\}$  NMR spectrum of **3b** in  $\text{CDCl}_3$  (†Inseparable impurity, § $\text{H}_2\text{O}$ , \*Grease, #Silicon grease).

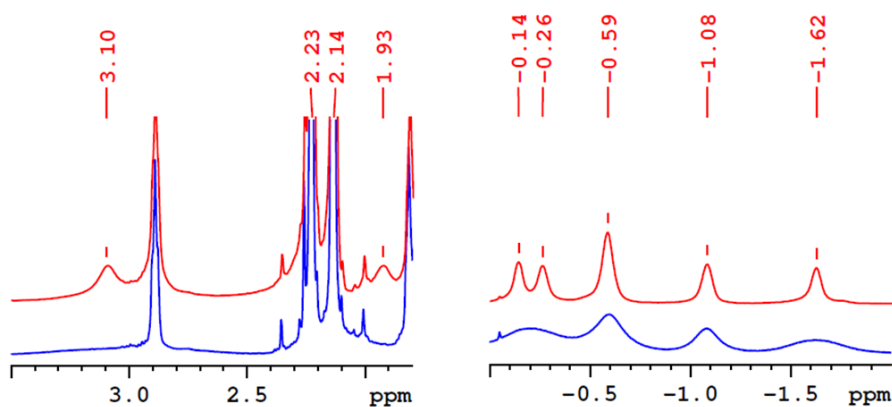

Figure S34. Stacked  $^1\text{H}$  (bottom) and  $^1\text{H}\{^{11}\text{B}\}$  NMR (top) spectra of **3b** in  $\text{CDCl}_3$ .

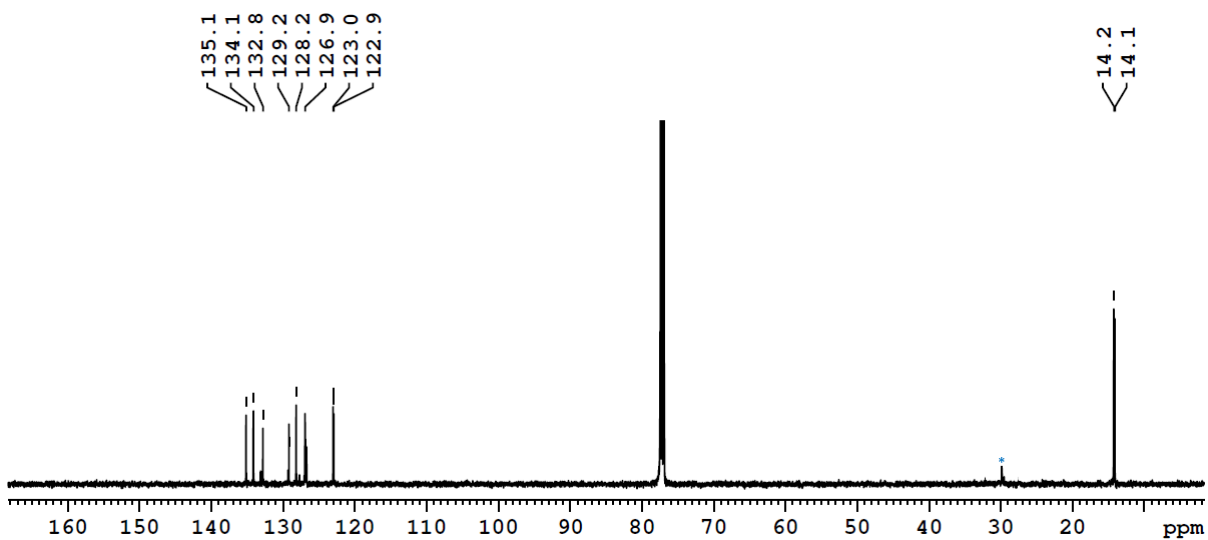

Figure S35.  $^{13}\text{C}\{^1\text{H}\}$  NMR spectrum of **3b** in  $\text{CDCl}_3$  (\*Grease).

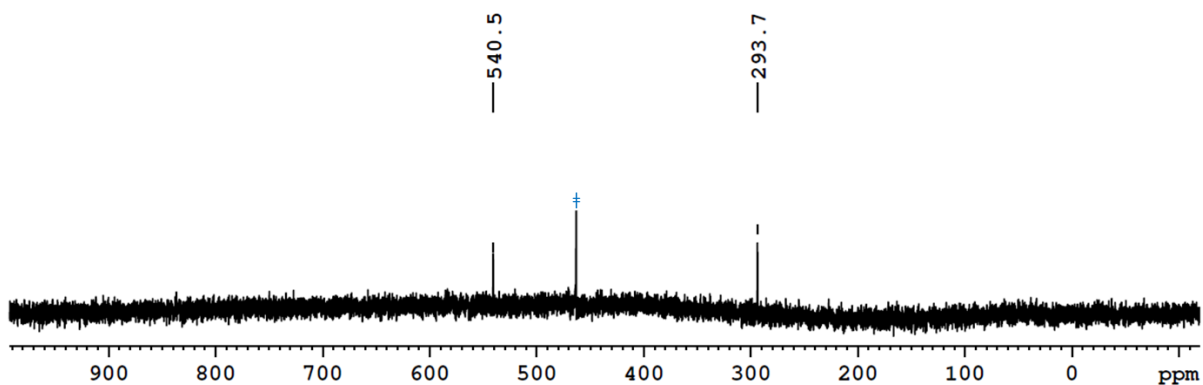

**Figure S36.**  $^{77}\text{Se}$  NMR spectrum of **3b** in  $\text{CDCl}_3$  († Peak at  $\delta = 463$  ppm is due to the presence of  $\text{Se}_2\text{Ph}_2$  as external reference).

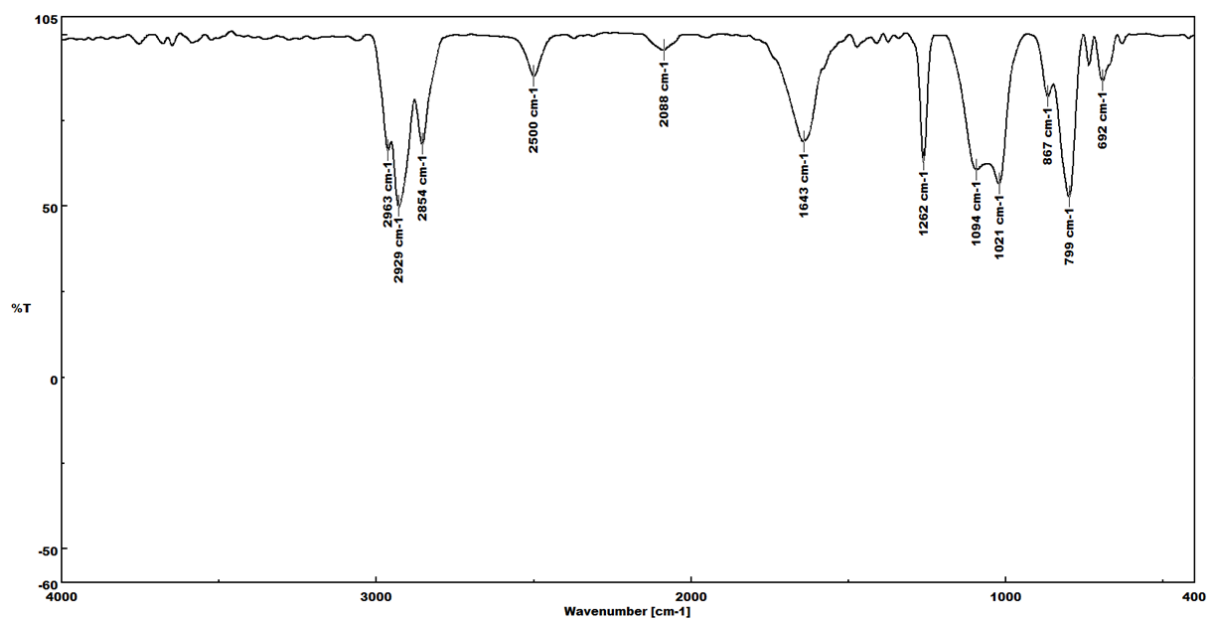

**Figure S37.** IR spectrum of **3b**.



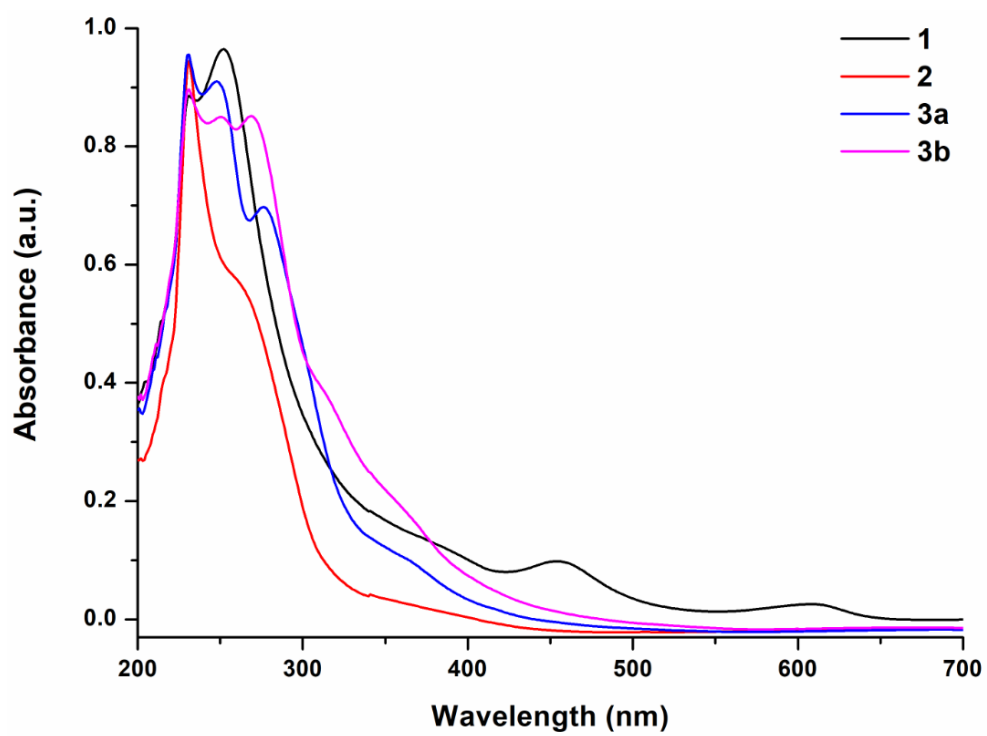

Figure S38. Combined UV-vis spectra of **1**, **2**, **3a**, and **3b** in CH<sub>2</sub>Cl<sub>2</sub>.

#### I.4 X-ray Analysis Details

Suitable X-ray quality crystals of **1**, **2**, and **3b** were grown by slow diffusion of a hexane-dichloromethane (80:20 v/v) solution at 5 °C. Crystal data of **1** was obtained and integrated using a Bruker APEX3 SC-XRD with PHOTON II detector, with graphite monochromated MoK $\alpha$  ( $\lambda = 0.71073$  Å) radiation at 302(2) K. Crystal data of **2** was obtained and integrated using a Bruker APEXII CCD diffractometer equipped with graphite monochromated MoK $\alpha$  ( $\lambda = 0.71073$  Å) radiation at 296(2) K. And crystal data of **3b** was obtained and integrated using a Bruker Apex-III SC-XRD with PHOTON II detector, with graphite monochromated MoK $\alpha$  ( $\lambda = 0.71073$  Å) radiation at 150(2) K. The structures were solved using SIR92<sup>[10]</sup> and refined with SHELXT-2014/7.<sup>[11]</sup> Using Olex2<sup>[12]</sup>, the molecular structures were drawn. Crystallographic data has been deposited with the Cambridge Crystallographic Data Center as supplementary publication no CCDC - 2353840 (**1**), 2321603 (**2**) and 2385700 (**3b**). The data can be obtained free of charge from The Cambridge Crystallographic Data Centre via [www.ccdc.cam.ac.uk/data\\_request/cif](http://www.ccdc.cam.ac.uk/data_request/cif).

Crystal data for **1**: C<sub>30</sub>H<sub>53</sub>B<sub>3</sub>Cl<sub>2</sub>Ti<sub>3</sub>,  $M_r = 725.52$ , orthorhombic, space group  $Pna2_1$ ,  $a = 17.2436(17)$  Å,  $b = 11.5096(10)$  Å,  $c = 18.5384(16)$  Å,  $\alpha = 90^\circ$ ,  $\beta = 90^\circ$ ,  $\gamma = 90^\circ$ ,  $V = 3679.3(6)$  Å<sup>3</sup>,  $Z = 4$ ,  $\rho_{\text{calcd}} = 1.310$  g/cm<sup>3</sup>,  $\mu = 0.802$  mm<sup>-1</sup>,  $F(000) = 1512$ ,  $R_1 = 0.0594$ ,  $wR_2 = 0.1413$ , 3851 independent reflections [ $2\theta \leq 41.67^\circ$ ] and 416 parameters.

Crystal data for **2**: C<sub>30</sub>H<sub>51</sub>B<sub>3</sub>Te<sub>2</sub>Ti<sub>3</sub>,  $M_r = 842.95$ , triclinic, space group  $P-1$ ,  $a = 8.2544(3)$  Å,  $b = 11.6397(5)$  Å,  $c = 18.6492(8)$  Å,  $\alpha = 91.086(3)^\circ$ ,  $\beta = 91.102(2)^\circ$ ,  $\gamma = 102.584(2)^\circ$ ,  $V = 1747.93(12)$  Å<sup>3</sup>,  $Z = 2$ ,  $\rho_{\text{calcd}} = 1.602$  g/cm<sup>3</sup>,  $\mu = 2.322$  mm<sup>-1</sup>,  $F(000) = 832$ ,  $R_1 = 0.0632$ ,  $wR_2 = 0.1660$ , 6035 independent reflections [ $2\theta \leq 50.76^\circ$ ] and 529 parameters.

Crystal data for **3b**: C<sub>32</sub>H<sub>49</sub>B<sub>5</sub>Se<sub>2</sub>Ti<sub>2</sub>,  $M_r = 741.42$ , orthorhombic, space group  $Pbca$ ,  $a = 15.9297(12)$  Å,  $b = 16.0271(12)$  Å,  $c = 29.237(2)$  Å,  $\alpha = 90^\circ$ ,  $\beta = 90^\circ$ ,  $\gamma = 90^\circ$ ,  $V = 7464.4(9)$  Å<sup>3</sup>,  $Z = 8$ ,  $\rho_{\text{calcd}} = 1.319$  g/cm<sup>3</sup>,  $\mu = 0.598$  mm<sup>-1</sup>,  $F(000) = 3024$ ,  $R_1 = 0.0401$ ,  $wR_2 = 0.0972$ , 9346 independent reflections [ $2\theta \leq 56.86^\circ$ ] and 407 parameters.

## II Computational Details

All molecules were fully optimized using the *Gaussian 09*<sup>[13]</sup> program employing the BP86 functional<sup>[14]</sup> in conjunction with a def2-SVP basis set from the EMSL Basis Set Exchange Library.<sup>[15]</sup> The model compounds were fully optimized in gaseous state (no solvent effect) starting from the X-ray crystallographic coordinates. Note that during optimization of **1**, Ti2...H1 distant was frozen and optimized. Note that the Ti-Ti bond becomes longer in clusters **1** and **2** in the optimized geometries as compared to the solid-state X-ray structures. Frequency calculations were performed at the same level of theory to verify the nature of the stationary states and the absence of any imaginary frequency to confirm that all structures represent minima on the potential energy hypersurface. Further, the gauge including atomic orbital (GIAO)<sup>[16-18]</sup> method was employed to compute the <sup>11</sup>B chemical shifts. The NMR chemical shifts were calculated using the hybrid Becke-Lee-Yang-Parr (B3LYP) functional<sup>[19]</sup> and the def2-SVP basis set on the BP86/def2-SVP optimized geometries. The <sup>11</sup>B NMR chemical shifts were calculated relative to B<sub>2</sub>H<sub>6</sub> (B3LYP B shielding constant 84.05 ppm) and converted to the usual [BF<sub>3</sub>.OEt<sub>2</sub>] scale using the experimental  $\delta$  (<sup>11</sup>B) value of B<sub>2</sub>H<sub>6</sub>, 16.6 ppm.<sup>[20]</sup> Natural bonding analyses were performed with the natural bond orbital (NBO) partitioning scheme<sup>[21]</sup> as implemented in the Gaussian 09 suite of programs. Wiberg bond indexes (WBI)<sup>[22]</sup> were obtained from a natural bond orbital analysis. In order to understand the nature of bonding in the synthesized molecules in greater detail, the topological properties of the resultant electron density,  $\rho$ , obtained from the wave functions of all the optimized structures were analyzed with the quantum theory of atoms in molecules (QTAIM).<sup>[23]</sup> The QTAIM analysis was carried out utilizing the Multiwfn V.3.4 package<sup>[24]</sup>, whereas the wave functions were generated with Gaussian09 at the same level of theory as for geometry optimization. All the optimized structures and orbital graphics were generated using the Gaussview<sup>[25]</sup>, and Chemcraft<sup>[26]</sup> visualization programs.

**Table.S1.** Selected geometrical parameters<sup>[a]</sup> and Wiberg bond indices (WBI) of **1**, **2**, **3a**, and **3b**.

| <b>1</b>  |       |       |        | <b>2</b>  |       |       |       |
|-----------|-------|-------|--------|-----------|-------|-------|-------|
|           | Expt. | Cal.  | WBI    |           | Expt. | Cal.  | WBI   |
| Ti1-Ti2   | 3.292 | 3.537 | 0.286  | Ti1-Ti2   | 2.57  | 3.049 | 0.630 |
| T1-Ti3    | 3.073 | 3.142 | 0.421  | T1-Ti3    | 3.09  | 3.316 | 0.382 |
| Ti2-Ti3   | 3.026 | 3.025 | 0.535  | Ti2-Ti3   | 2.947 | 3.267 | 0.438 |
| Ti1-B1    | 2.513 | 2.450 | 0.361  | Ti1-B1    | 2.52  | 2.41  | 0.335 |
| Ti1-B7    | 2.347 | 2.283 | 0.433  | Ti1-B2    | 2.266 | 2.366 | 0.406 |
| Ti1-B9    | 2.494 | 2.245 | 0.693  | Ti1-Te1   | 2.558 | 2.730 | 0.843 |
| Ti2-B7    | 2.386 | 2.359 | 0.402  | Ti2-B1    | 2.57  | 2.358 | 0.402 |
| Ti3-B4    | 2.529 | 2.597 | 0.369  | Ti2-B2    | 2.289 | 2.232 | 0.461 |
| B7-B8     | 1.66  | 1.662 | 0.686  | Ti2-B3    | 2.485 | 2.422 | 0.330 |
| B5-B6     | 1.74  | 1.755 | 0.559  | Ti2-Te2   | 2.658 | 2.791 | 0.763 |
| B8-H1     | 1.19  | 1.188 | 0.594  | Ti3-B2    | 2.279 | 2.299 | 0.496 |
| Ti2-H1    | 1.95  | 1.945 | 0.204  | Ti3-Te1   | 2.630 | 2.733 | 0.983 |
| B7-Cl1    | 1.854 | 1.987 | 1.643  | B1-B2     | 1.57  | 1.753 | 0.753 |
| Ti1-Cl1   | 2.543 | 2.686 | 0.437  | B2-B3     | 1.718 | 1.739 | 0.772 |
| Ti2-Cl2   | 2.407 | 2.468 | 0.616  | B2-Te1    | 2.341 | 2.272 | 0.815 |
| <b>3a</b> |       |       |        | <b>3b</b> |       |       |       |
|           | Expt. | Cal.  | WBI    |           | Expt. | Cal.  | WBI   |
| Ti1-Ti2   | -     | 3.049 | 0.344  | Ti1-Ti2   | 3.028 | 3.056 | 0.332 |
| Ti1-B1    | -     | 2.568 | 0.250  | Ti1-B1    | 2.545 | 2.542 | 0.260 |
| Ti1-B3    | -     | 2.270 | 0.533  | Ti1-B3    | 2.271 | 2.284 | 0.530 |
| Ti1-B4    | -     | 2.551 | 0.255  | Ti1-B4    | 2.554 | 2.548 | 0.256 |
| Ti2-B2    | -     | 2.546 | 0.260  | Ti2-B2    | 2.612 | 2.645 | 0.223 |
| Ti2-B3    | -     | 2.254 | 0.544  | Ti2-B3    | 2.254 | 2.258 | 0.541 |
| Ti2-B5    | -     | 2.549 | 0.263  | Ti2-B5    | 2.542 | 2.532 | 0.267 |
| Ti1-Se1   | -     | 2.667 | 0.760  | Ti1-Se1   | 2.645 | 2.655 | 0.768 |
| Ti1-Se2   | -     | 2.485 | 1.173  | Ti1-Se2   | 2.459 | 2.486 | 1.169 |
| B1-B2     | -     | 1.782 | 0.558  | B1-B2     | 1.784 | 1.790 | 0.552 |
| B1-B3     | -     | 1.714 | 0.643  | B1-B3     | 1.700 | 1.713 | 0.636 |
| B2-B3     | -     | 1.711 | 0.647  | B2-B3     | 1.717 | 1.731 | 0.636 |
| B4-B5     | -     | 1.788 | 0.5518 | B4-B5     | 1.787 | 1.789 | 0.548 |
|           |       |       |        | B2-C1     | 1.587 | 1.599 | 0.887 |
|           |       |       |        | Se1-C2    | 1.953 | 1.976 | 0.97  |

<sup>[a]</sup> Note that the Ti-Ti bond becomes longer in clusters **1** and **2** in the optimized geometries as compared to the solid-state X-ray structures.

**Table S2.** Selected experimental and Calculated bond angles of **1**, **2**, **3a**, and **3b**.

| <b>1</b>    |       |        | <b>2</b>    |       |        |
|-------------|-------|--------|-------------|-------|--------|
|             | Expt. | Cal.   |             | Expt. | Cal.   |
| Ti1-Ti2-Ti3 | 58.01 | 56.56  | Ti1-Ti2-Ti3 | 60.30 | 63.21  |
| Ti2-Ti3-Ti1 | 63.34 | 69.97  | Ti2-Ti3-Ti1 | 63.79 | 55.18  |
| Ti3-Ti2-Ti2 | 56.65 | 53.46  | Ti3-Ti2-Ti2 | 55.90 | 61.60  |
| Ti1-B9-Ti3  | 91.3  | 89.27  | Ti1-B2-Ti2  | 89.0  | 83.03  |
| Ti1-Cl2-Ti3 | 78.01 | 76.72  | Ti-B2-Ti3   | 85.7  | 90.57  |
| Ti1-Cl1-B1  | 62.2  | 56.10  | Ti2-B2-Ti3  | 80.3  | 92.27  |
| Ti2-H1-Ti3  | 94.50 | 94.51  | Ti-B1-Ti2   | 77.54 | 79.49  |
| Ti2-H1-B8   | 89.35 | 84.79  | Ti1-Te2-Ti2 | 77.78 | 66.67  |
| Ti3-B3-B6   | 119.2 | 117.89 | Ti1-Te1-Ti3 | 77.13 | 74.75  |
| B3-B6-B5    | 113.7 | 112.21 | Ti-B1-B2    | 62.25 | 62.11  |
|             |       |        | B1-B2-B3    | 112.5 | 119.64 |
| <b>3a</b>   |       |        | <b>3b</b>   |       |        |
|             | Expt. | Cal.   |             | Expt. | Cal.   |
| Ti1-B3-Ti2  | -     | 84.74  | Ti1-B3-Ti2  | 84.03 | 84.56  |
| Ti1-B1-B2   | -     | 104.13 | Ti1-B1-B2   | 105.6 | 106.79 |
| Ti1-Ti2-B2  | -     | 75.93  | Ti1-Ti2-B2  | 75.76 | 75.81  |
| B1-B3-B2    | -     | 62.69  | B1-B3-B2    | 62.96 | 62.59  |
| B1-B3-B5    | -     | 156.01 | B1-B3-B5    | 155.9 | 158.09 |
| Ti-Se1Ti2   | -     | 69.14  | Ti-Se1Ti2   | 69.51 | 69.35  |
| Ti1-Se2-Ti2 | -     | 75.86  | Ti1-Se2-Ti2 | 75.97 | 75.08  |

**Table S3.** Calculated natural charges (q) and natural valence population (Pop) of **1**, **2**, **3a**, and **3b**.

| <b>1</b> |        |          | <b>2</b> |        |          |
|----------|--------|----------|----------|--------|----------|
|          | q      | Pop(val) |          | q      | Pop(val) |
| Ti1      | 0.523  | 3.246    | Ti1      | 0.099  | 3.909    |
| Ti2      | 0.085  | 3.816    | Ti2      | 0.159  | 3.855    |
| Ti3      | 0.392  | 3.452    | Ti3      | 0.0878 | 3.924    |
| B1       | -0.366 | 3.330    | B1       | -0.356 | 3.337    |
| B2       | -0.276 | 3.237    | B2       | -0.289 | 3.248    |
| B3       | -0.219 | 3.185    | B3       | -0.363 | 3.344    |
| B4       | -0.258 | 3.226    | Te1      | 0.298  | 5.698    |
| B5       | -0.178 | 3.143    | Te2      | 0.057  | 5.939    |
| B6       | -0.233 | 3.198    |          |        |          |
| B7       | -0.027 | 2.993    |          |        |          |

|           |        |          |           |        |          |
|-----------|--------|----------|-----------|--------|----------|
| B8        | -0.161 | 3.123    |           |        |          |
| B9        | -0.301 | 3.264    |           |        |          |
| Cl1       | 0.189  | 6.788    |           |        |          |
| Cl2       | 0.136  | 6.834    |           |        |          |
| <b>3a</b> |        |          | <b>3b</b> |        |          |
|           | q      | Pop(val) |           | q      | Pop(val) |
| Ti1       | 0.048  | 3.961    | Ti1       | 0.103  | 3.976    |
| Ti2       | 0.056  | 3.954    | Ti2       | 0.033  | 3.908    |
| B1        | -0.184 | 3.168    | B1        | -0.190 | 3.173    |
| B2        | -0.184 | 3.169    | B2        | 0.081  | 2.894    |
| B3        | -0.340 | 3.300    | B3        | -0.344 | 3.307    |
| B4        | -0.175 | 3.159    | B4        | -0.176 | 3.160    |
| B5        | -0.178 | 3.162    | B5        | -0.186 | 3.171    |
| Se1       | 0.216  | 5.762    | Se1       | 0.219  | 5.760    |
| Se2       | -0.020 | 6.015    | Se2       | -0.021 | 6.015    |

**Table S4.** Calculated HOMO–LUMO energy gap of **1**, **2**, **3a**, and **3b**.

|                       | <b>1</b> | <b>2</b> | <b>3a</b> | <b>3b</b> |
|-----------------------|----------|----------|-----------|-----------|
| $\Delta E_{H-L}$ (eV) | 1.63     | 1.70     | 1.773     | 1.783     |

**Table S5.** Calculated chemical shifts for complexes **1**, **2**, **3a**, and **3b**.

| Compounds | <sup>11</sup> B NMR value (ppm) |                         |
|-----------|---------------------------------|-------------------------|
|           | Experimental                    | Theoretical             |
| <b>1</b>  | 31.6                            | 11.1, 13.4, 16.6, 18.45 |
|           | 40.0                            | 35.9, 37.2              |
|           | 45.0                            | 52.4                    |
|           | 52.3                            | 67.5                    |
|           | 66.4                            | 84.5                    |
| <b>2</b>  | -7.7                            | -10.4, 6.9              |
|           | 54.0                            | 62.7                    |
| <b>3a</b> | -2.2                            | -10.2, -9.1             |
|           | 0.8                             | -7.0, -4.5              |
|           | 51.3                            | 37.3                    |
| <b>3b</b> | -0.3                            | -8.9                    |
|           | 1.4                             | -5.9, -4.6              |
|           | 5.2                             | -0.5                    |
|           | 50.6                            | 35.8                    |

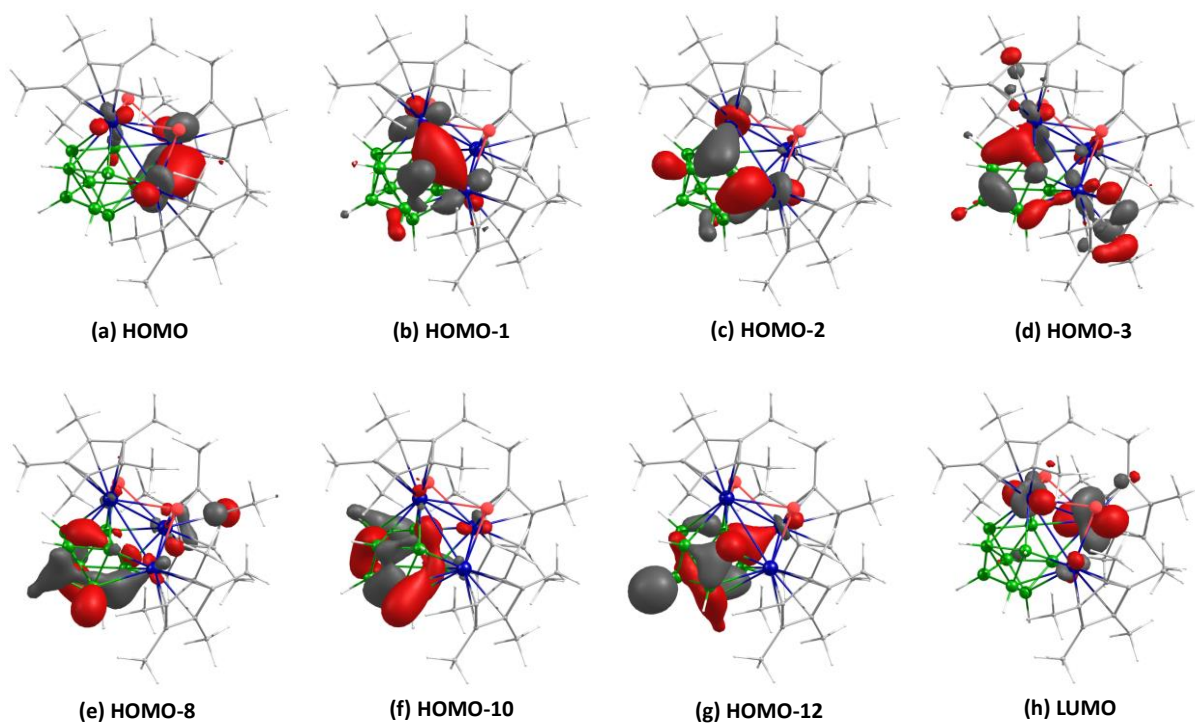

Figure S39. Selected molecular orbitals of **1** (isocontour values:  $\pm 0.045$  [e.bohr<sup>-3</sup>]<sup>1/2</sup>).

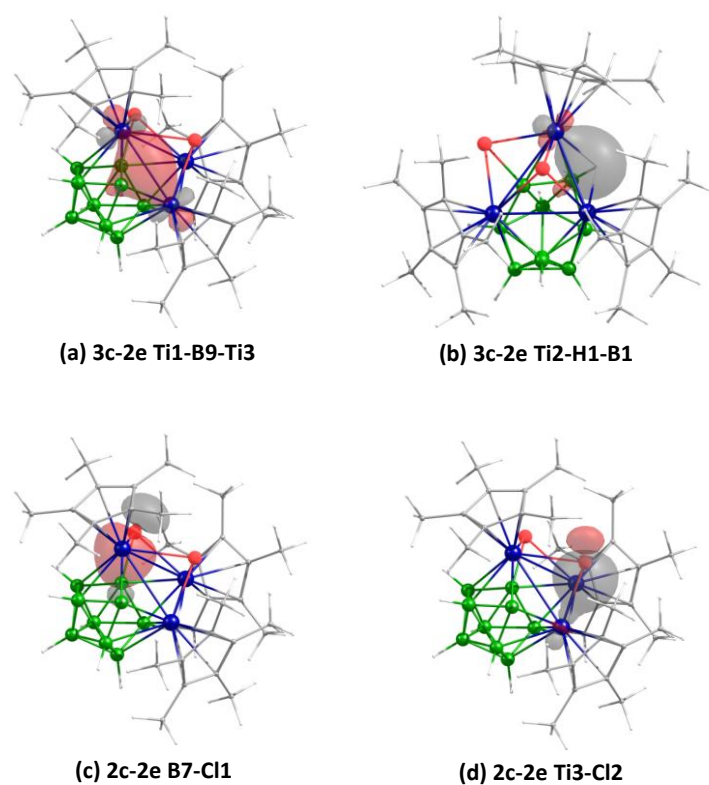

Figure S40. Selected NBO interactions of **1** (isocontour values:  $\pm 0.045$  [e.bohr<sup>-3</sup>]<sup>1/2</sup>).

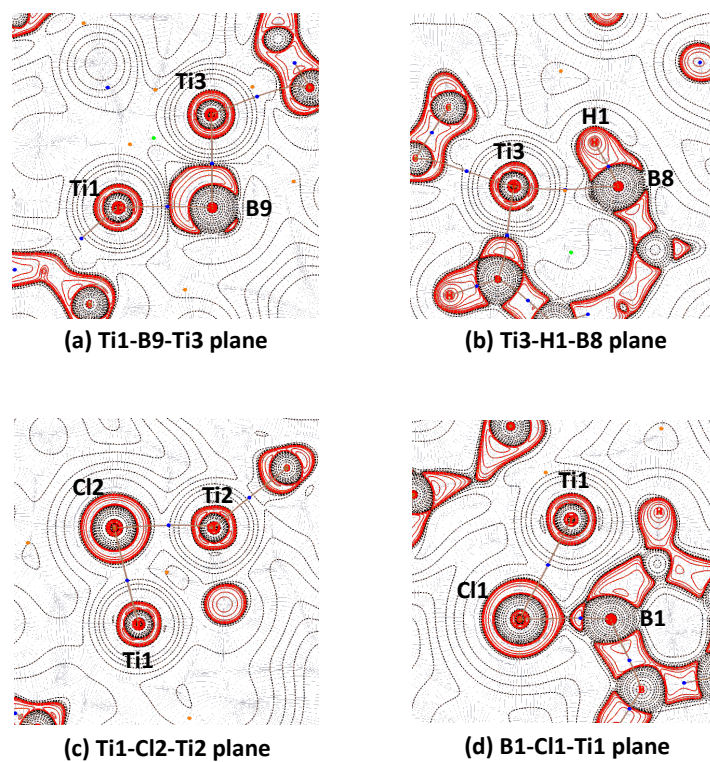

**Figure S41.** Contour-line diagram of the Laplacian of the electron density of **1** in selected planes. The solid brown lines are bond paths, whereas blue dots indicate the bond-critical points (BCP). Solid red lines indicate the areas of charge concentration ( $\nabla^2\rho(r) < 0$ ), while dashed black lines show the areas of charge depletion ( $\nabla^2\rho(r) > 0$ ).

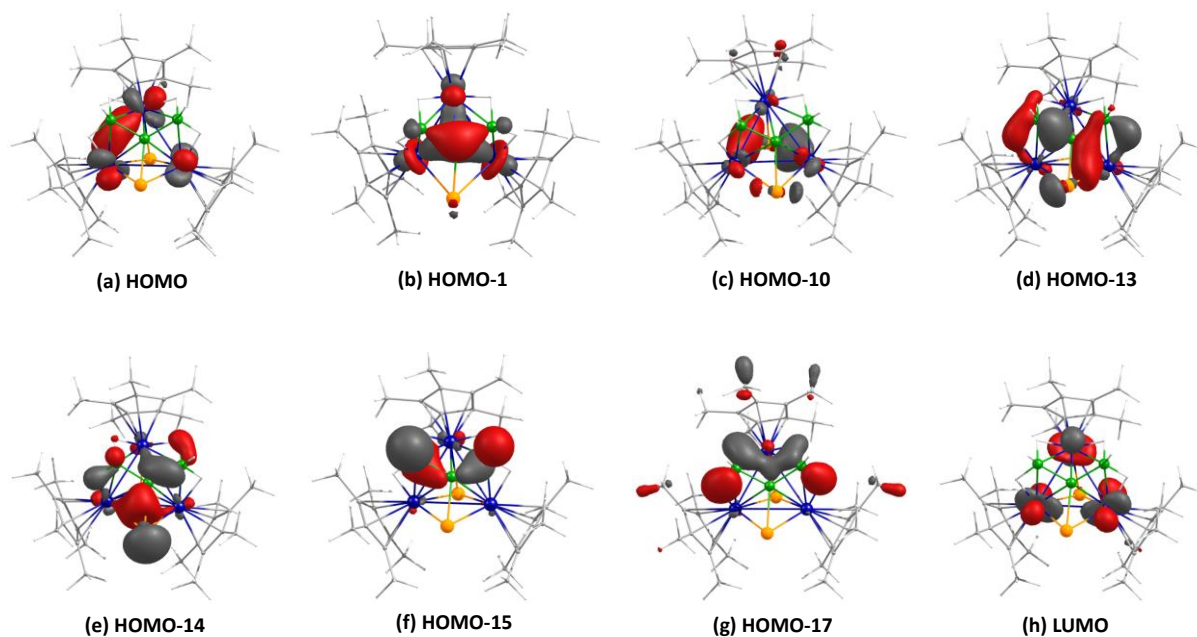

**Figure S42.** Selected molecular orbitals of **2** (isocontour values:  $\pm 0.045$  [e.bohr<sup>-3</sup>]<sup>1/2</sup>).

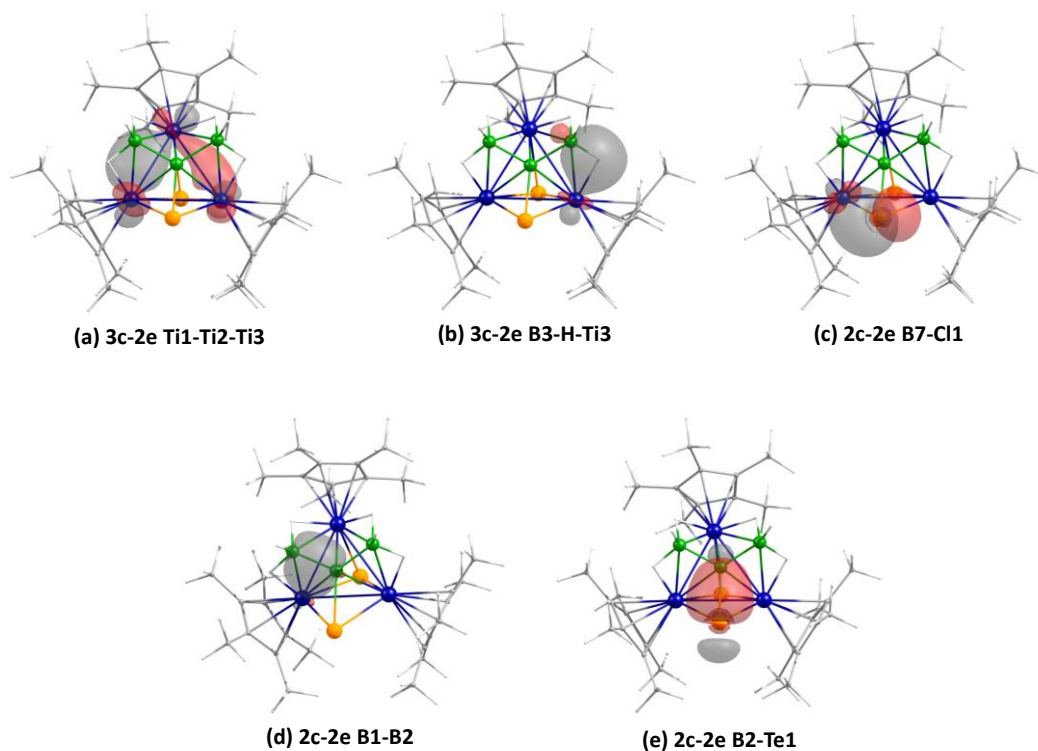

Figure S43. Selected NBO interactions of **2** (isocontour values:  $\pm 0.045$  [ $e \cdot \text{bohr}^{-3}$ ] $^{1/2}$ ).

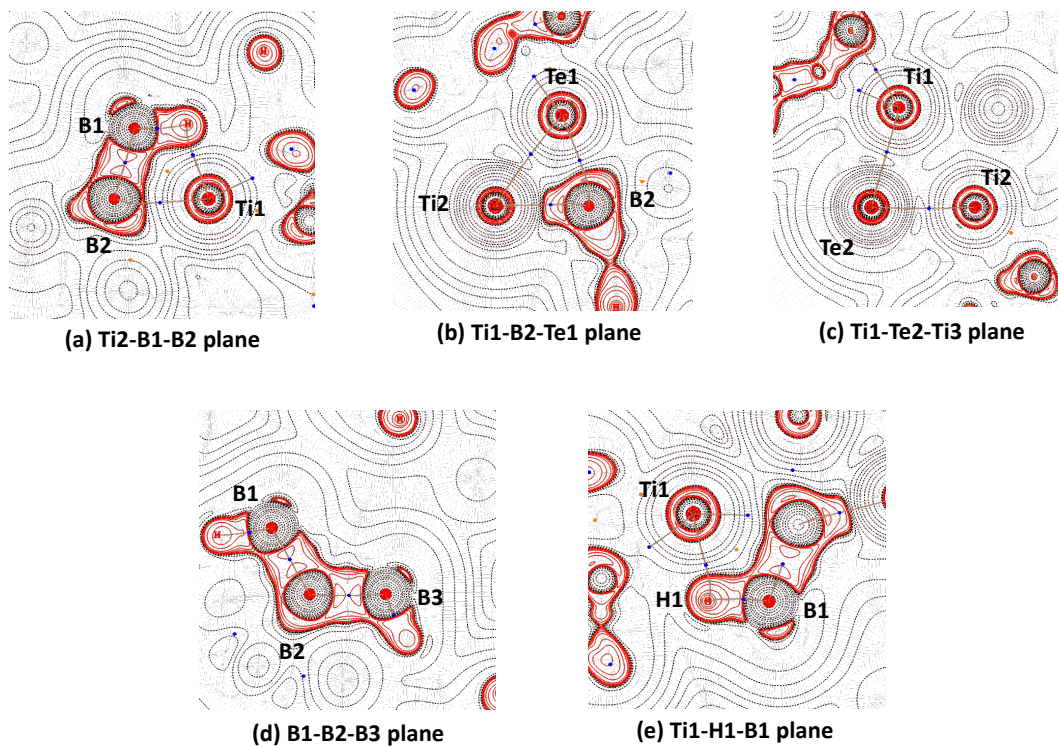

Figure S44. Contour-line diagram of the Laplacian of the electron density of **2** in selected planes. The solid brown lines are bond paths, whereas blue dots indicate the bond-critical points (BCP). Solid red lines indicate the areas of charge concentration ( $\nabla^2\rho(r) < 0$ ), while dashed black lines show the areas of charge depletion ( $\nabla^2\rho(r) > 0$ ).



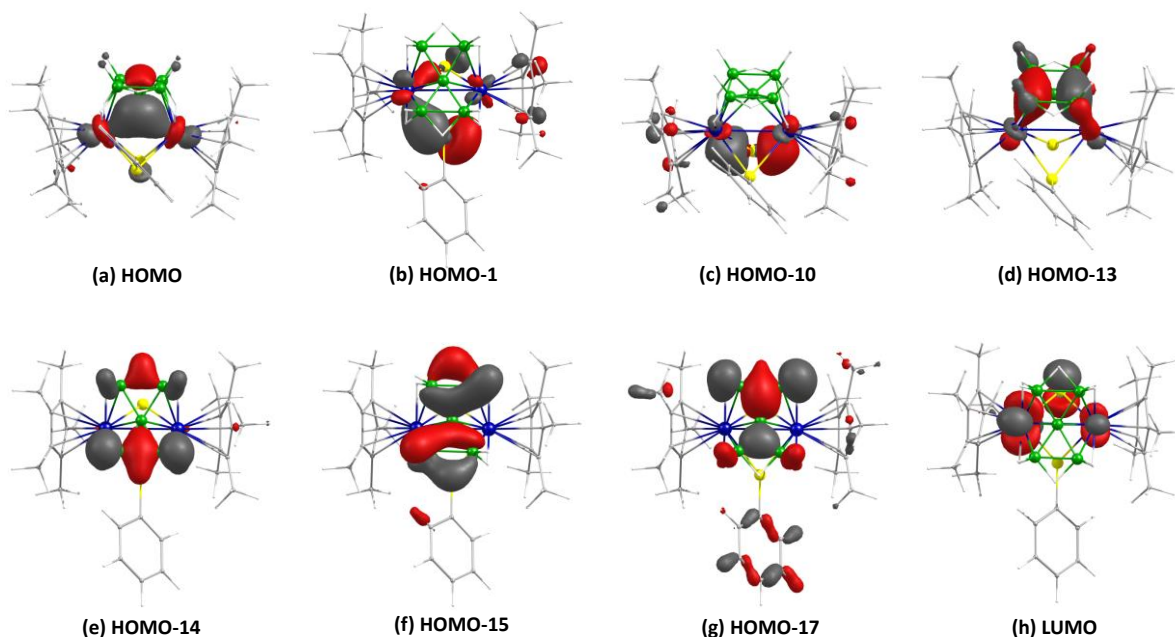

**Figure S45.** Selected molecular orbitals of **3a** (isocontour values:  $\pm 0.045$  [ $\text{e}\cdot\text{bohr}^{-3/2}$ ]). A comparison of the MO energies of **3a** (1.77 eV) and **3b** (1.78 eV) reveals comparable HOMO-LUMO gaps. Given the structural and bonding similarities between clusters **3a** and **3b**, this analysis focuses on the detailed bonding characteristics of cluster **3a**. The HOMO of **3a** exhibits overlap of d orbitals between the two titanium centers and d-p interactions between the titanium centers and the boride boron atom (B3), indicating strong bonding interactions between the titanium centers and significant metal-boride interactions (Fig. S45a). The WBI of 0.34 for the Ti1-Ti2 bond (Table S1) further corroborates the presence of metal-metal interaction. The LUMO of **3a** is primarily localized on the Ti1, Ti2, and Se2 centers (Figure S45h). HOMO-1 and HOMO-14 demonstrate d-p orbital interactions of Ti-S bonds (Figure S45b-c), which are also evident in the contour line map in the Ti1-Se1-Ti2 plane (Figure 47f). Additionally, HOMO-13, HOMO-14, HOMO-15, and HOMO-17 of **3a** illustrate metal-boron and boron-boron bonding interactions (Figure S45d-g).

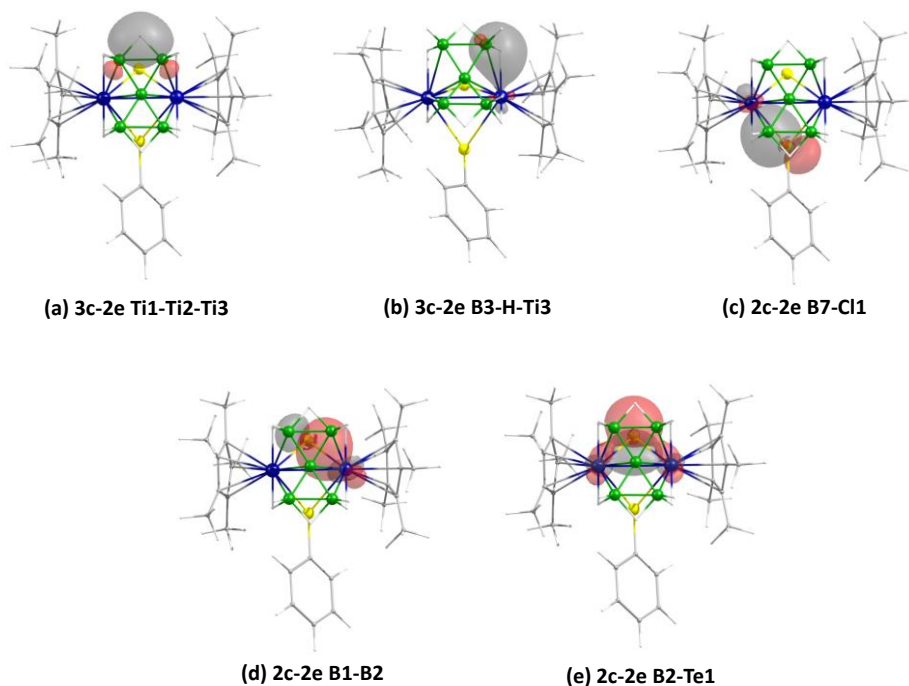

**Figure S46.** Selected NBO interactions of **3a** (isocontour values:  $\pm 0.045$  [ $\text{e}\cdot\text{bohr}^{-3/2}$ ]). The NBO analysis of compound **3a** corroborates the MO findings previously discussed. NBO analysis provides a localized description of electronic structure, offering complementary insights to the MO analysis.

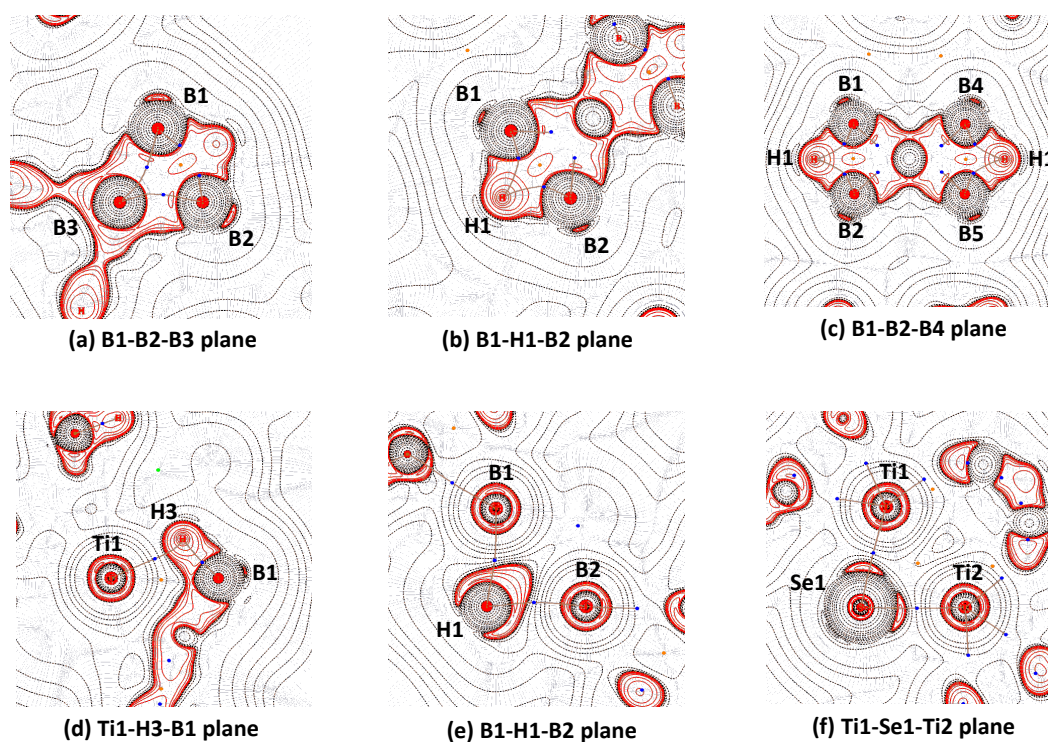

**Figure S47.** Contour-line diagram of the Laplacian of the electron density of **3a** in selected planes. The solid brown lines are bond paths, whereas blue dots indicate the bond-critical points (BCP). Solid red lines indicate the areas of charge concentration ( $\nabla^2\rho(r) < 0$ ), while dashed black lines show the areas of charge depletion ( $\nabla^2\rho(r) > 0$ ). The contour line plot along the B1-B2-B3 plane shows a high amount of charge concentrations and the BCPs between B1-B3 and B2-B3 bonds specified strong bonding interactions of the boride boron with the peripheral boron atoms (Figure S47a). This is also supported by the WBI of those particular bonds. Furthermore, the Laplacian electron density plot of **3a** shows the bonding scenario of the pentaborane plane, which is coordinated symmetrically to both metal centers (Fig. S47c).

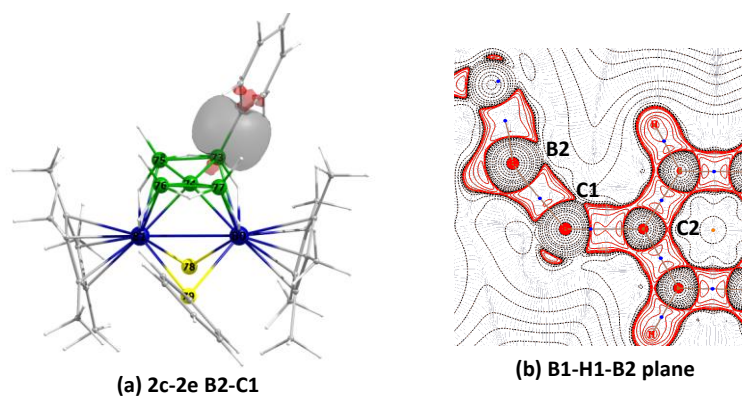

**Figure S48.** (a) Selected NBO interaction of **3b** (isocontour values:  $\pm 0.045$  [e.bohr $^{-3}$ ] $^{1/2}$ ). (b) Contour-line diagram of the Laplacian of the electron density of **3b** along B2-C1-C2 plane. The solid brown lines are bond paths, whereas blue dots indicate the bond-critical points (BCP). Solid red lines indicate the areas of charge concentration ( $\nabla^2\rho(r) < 0$ ), while dashed black lines show the areas of charge depletion ( $\nabla^2\rho(r) > 0$ ). The NBO analysis depicts the 2c-2e B2-C1 interaction of B<sub>5</sub>H<sub>9</sub>Ph fragment in **3b**, which is also reflected in the contour line map in the B2-C1-C2 plane.

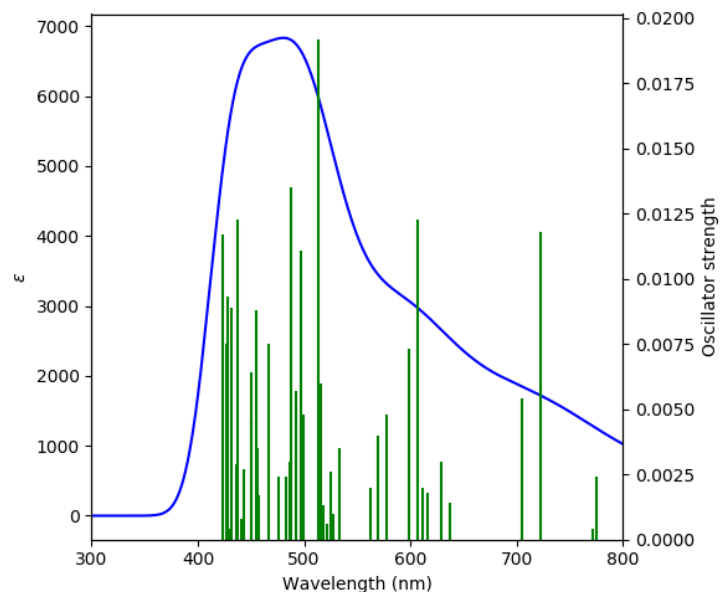

**Figure S49.** Absorption spectrum of **1** computed at TD-DFT-B3LYP/Def2-SVP level of theory ( $\epsilon$  in  $\text{LM}^{-1}\text{cm}^{-1}$ ).

**Table S6.** TD-DFT calculated energies (excitation energy (eV),  $\lambda_{\text{calc}}$  (nm)), oscillator strength ( $f$ ), and main composition of the first UV-vis electronic excitations for **1**. Experimental absorption wavelengths ( $\lambda_{\text{exp}}$ , nm) of **1** are given for comparison.

| No | Excitation Energy (eV) | Wavelength $\lambda$ (nm)    |       | Main electronic transition (% weight) <sup>[b]</sup>                               |
|----|------------------------|------------------------------|-------|------------------------------------------------------------------------------------|
|    |                        | Calc. ( $f$ ) <sup>[a]</sup> | Expt. |                                                                                    |
| 1  | 1.716                  | 722 (0.012)                  |       | HOMO→LUMO+4 (77)                                                                   |
| 2  | 2.044                  | 606 (0.012)                  | 607   | HOMO-2→LUMO+2 (32)<br>HOMO→LUMO+5 (29)<br>HOMO-4→LUMO (13)                         |
| 3  | 2.417                  | 513 (0.019)                  |       | HOMO-4→LUMO+2 (37)<br>HOMO-3→LUMO+2 (26)                                           |
| 4  | 2.493                  | 497 (0.011)                  |       | HOMO-8→LUMO (54)<br>HOMO-6→LUMO+1 (13)                                             |
| 5  | 2.542                  | 488 (0.013)                  | 455   | HOMO-6→LUMO+1 (25)<br>HOMO-6→LUMO+2 (25)<br>HOMO-2→LUMO+4 (20)                     |
| 6  | 2.837                  | 437 (0.012)                  |       | HOMO→LUMO+9 (23)<br>HOMO-5→LUMO+3 (21)<br>HOMO-1→LUMO+6 (17)<br>HOMO-9→LUMO+1 (11) |
| 7  | 2.925                  | 424 (0.012)                  |       | HOMO-4→LUMO+4 (50)<br>HOMO-3→LUMO+4 (19)                                           |

<sup>[a]</sup>Oscillator strength greater than 0.010 and <sup>[b]</sup>Components with greater than 10% contribution shown.

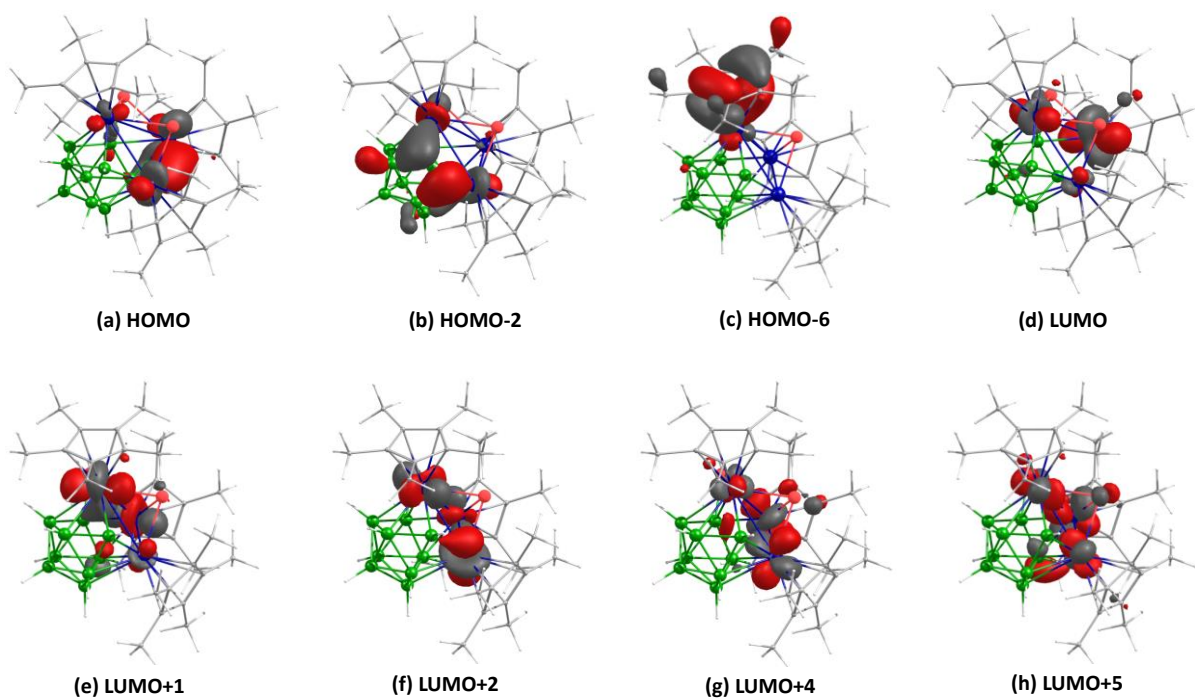

**Figure S50.** Selected molecular orbitals of **1** related to most intense electronic transitions [isocontour values:  $\pm 0.045$  ( $e/\text{bohr}^3$ )<sup>1/2</sup>].

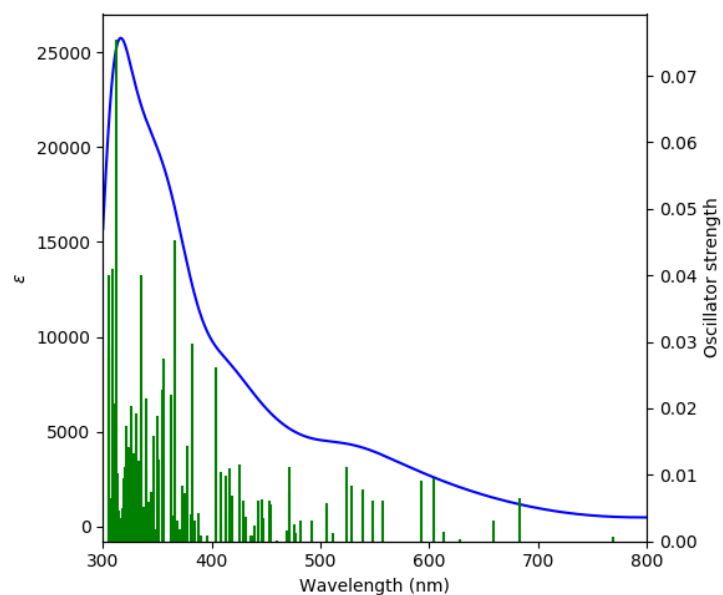

**Figure S51.** Absorption spectrum of **2** computed at TD-DFT-B3LYP/Def2-SVP level of theory ( $\epsilon$  in  $\text{LM}^{-1}\text{cm}^{-1}$ ).

**Table S7.** TD-DFT calculated energies (excitation energy (eV),  $\lambda_{\text{calc}}$  (nm)), oscillator strength ( $f$ ), and main composition of the first UV-vis electronic excitations for **2**. Experimental absorption wavelengths ( $\lambda_{\text{exp}}$ , nm) of **2** are given for comparison.

| No | Excitation Energy (eV) | Wavelength $\lambda$ (nm)    |       | Main electronic transition (% weight) <sup>[b]</sup>                                    |
|----|------------------------|------------------------------|-------|-----------------------------------------------------------------------------------------|
|    |                        | Calc. ( $f$ ) <sup>[a]</sup> | Expt. |                                                                                         |
| 1  | 3.068                  | 404 (0.026)                  |       | HOMO-7→LUMO+2 (22)<br>HOMO-9→LUMO+1 (16)                                                |
| 2  | 3.246                  | 382 (0.030)                  |       | HOMO-12→LUMO (25)<br>HOMO-1→LUMO+7 (19)                                                 |
| 3  | 3.391                  | 366 (0.045)                  |       | HOMO-6→LUMO+3 (27)<br>HOMO-10→LUMO+2 (18)<br>HOMO-1→LUMO+8 (15)                         |
| 4  | 3.416                  | 363 (0.022)                  |       | HOMO-1→LUMO+9 (55)<br>HOMO-3→LUMO+4 (19)                                                |
| 5  | 3.482                  | 356 (0.027)                  |       | HOMO-2→LUMO+5 (25)<br>HOMO-3→LUMO+4 (18)                                                |
| 6  | 3.542                  | 350 (0.019)                  |       | HOMO-11→LUMO+2 (35)<br>HOMO-8→LUMO+3 (13)<br>HOMO-2→LUMO+5 (12)<br>HOMO-1→LUMO+10 (12)  |
| 7  | 3.577                  | 347 (0.016)                  |       | HOMO-2→LUMO+6 (81)                                                                      |
| 8  | 3.647                  | 340 (0.022)                  |       | HOMO-12→LUMO+1 (25)<br>HOMO-1→LUMO+10 (14)<br>HOMO-9→LUMO+3 (11)<br>HOMO-1→LUMO+11 (14) |
| 9  | 3.697                  | 335 (0.040)                  | 346   | HOMO-3→LUMO+6 (20)<br>HOMO-3→LUMO+5 (11)                                                |
| 10 | 3.748                  | 331 (0.019)                  |       | HOMO-6→LUMO+4 (25)<br>HOMO→LUMO+14 (23)<br>HOMO-10→LUMO+3 (19)                          |

<sup>[a]</sup>Oscillator strength greater than 0.010 and <sup>[b]</sup>Components with greater than 10% contribution shown.

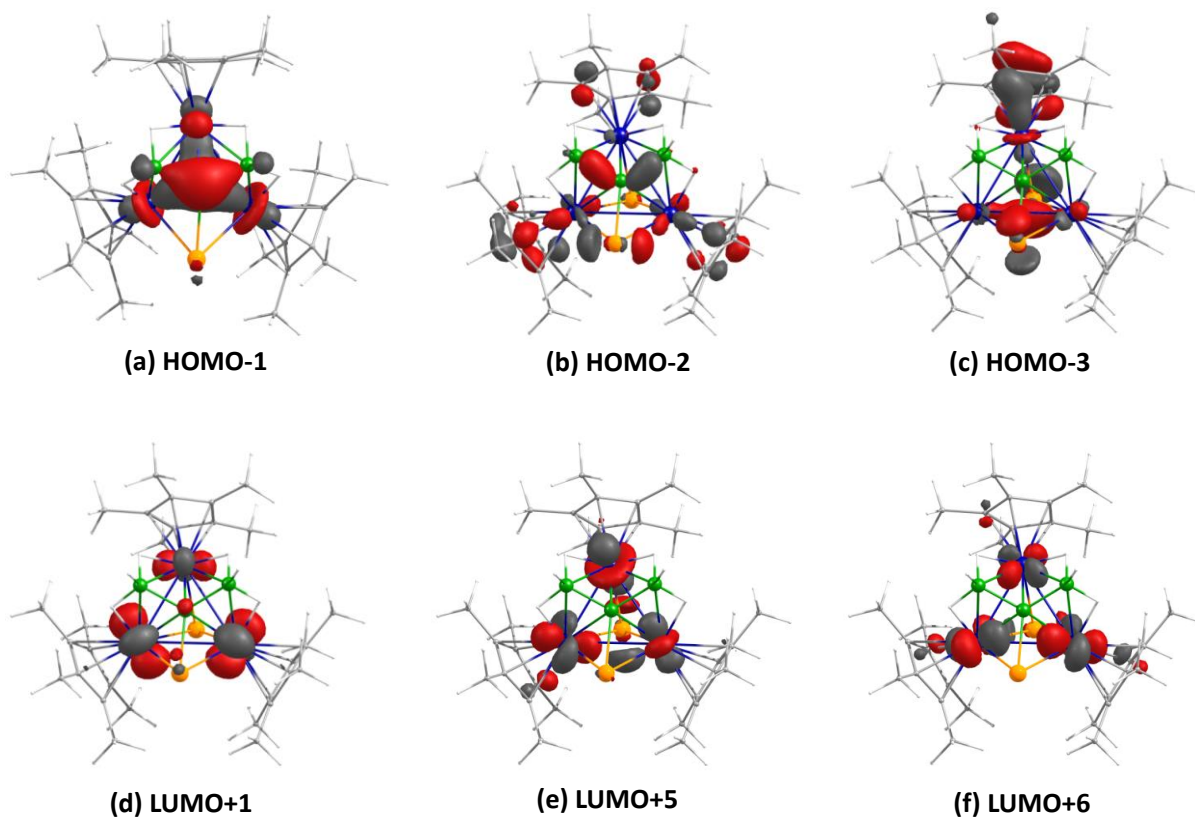

**Figure S52.** Selected molecular orbitals of **2** related to most intense electronic transitions [isocontour values:  $\pm 0.045$  ( $e/\text{bohr}^3$ )<sup>1/2</sup>].

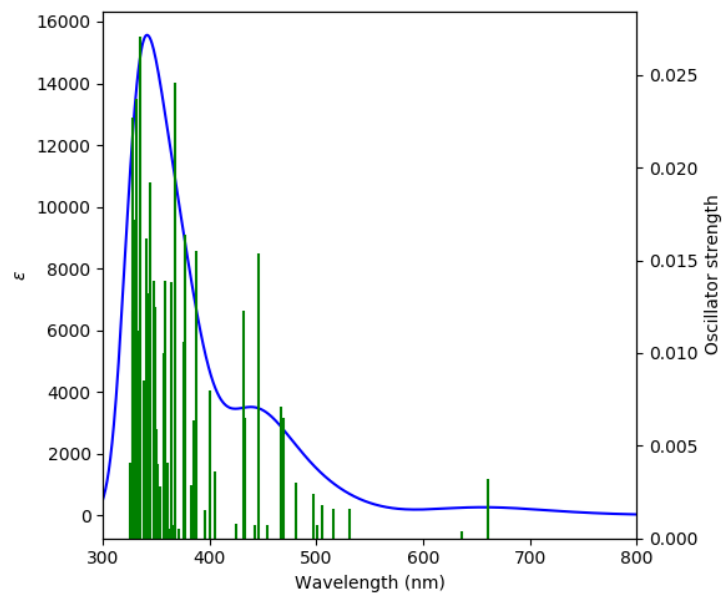

**Figure S53.** Absorption spectrum of **3a** computed at TD-DFT-B3LYP/Def2-SVP level of theory ( $\epsilon$  in  $\text{LM}^{-1}\text{cm}^{-1}$ ).

**Table S8.** TD-DFT calculated energies (excitation energy (eV),  $\lambda_{\text{calc}}$  (nm)), oscillator strength ( $f$ ), and main composition of the first UV-vis electronic excitations for **3a**. Experimental absorption wavelengths ( $\lambda_{\text{exp}}$ , nm) of **3a** are given for comparison.

| No | Excitation Energy (eV) | Wavelength $\lambda$ (nm)    |       | Main electronic transition (% weight) <sup>[b]</sup>                                |
|----|------------------------|------------------------------|-------|-------------------------------------------------------------------------------------|
|    |                        | Calc. ( $f$ ) <sup>[a]</sup> | Expt. |                                                                                     |
| 1  | 2.784                  | 445 (0.015)                  |       | HOMO→LUMO+2 (84)                                                                    |
| 2  | 2.874                  | 431 (0.012)                  |       | HOMO-6→LUMO+1 (60)<br>HOMO-6→LUMO (14)                                              |
| 3  | 3.203                  | 387 (0.016)                  |       | HOMO→LUMO+5 (49)<br>HOMO→LUMO+6 (15)                                                |
| 4  | 3.293                  | 377 (0.016)                  |       | HOMO-2→LUMO+2 (64)<br>HOMO-8→LUMO+1 (12)                                            |
| 5  | 3.305                  | 375 (0.011)                  |       | HOMO-8→LUMO+1 (74)<br>HOMO-2→LUMO+2 (12)                                            |
| 6  | 3.379                  | 367 (0.025)                  | 364   | HOMO-3→LUMO+2 (63)<br>HOMO-1→LUMO+3 (21)                                            |
| 7  | 3.411                  | 363 (0.014)                  |       | HOMO-4→LUMO+2 (59)<br>HOMO→LUMO+6 (21)                                              |
| 8  | 3.461                  | 358 (0.014)                  |       | HOMO→LUMO+6 (18)<br>HOMO-4→LUMO+2 (17)<br>HOMO-10→LUMO+1 (15)<br>HOMO-5→LUMO+2 (12) |
| 9  | 3.558                  | 348 (0.013)                  |       | HOMO-3→LUMO+3 (64)                                                                  |
| 10 | 3.571                  | 347 (0.014)                  |       | HOMO→LUMO+7 (24)<br>HOMO-5→LUMO+2 (18)<br>HOMO-11→LUMO (17)                         |

<sup>[a]</sup>Oscillator strength greater than 0.010 and <sup>[b]</sup>Components with greater than 10% contribution shown.

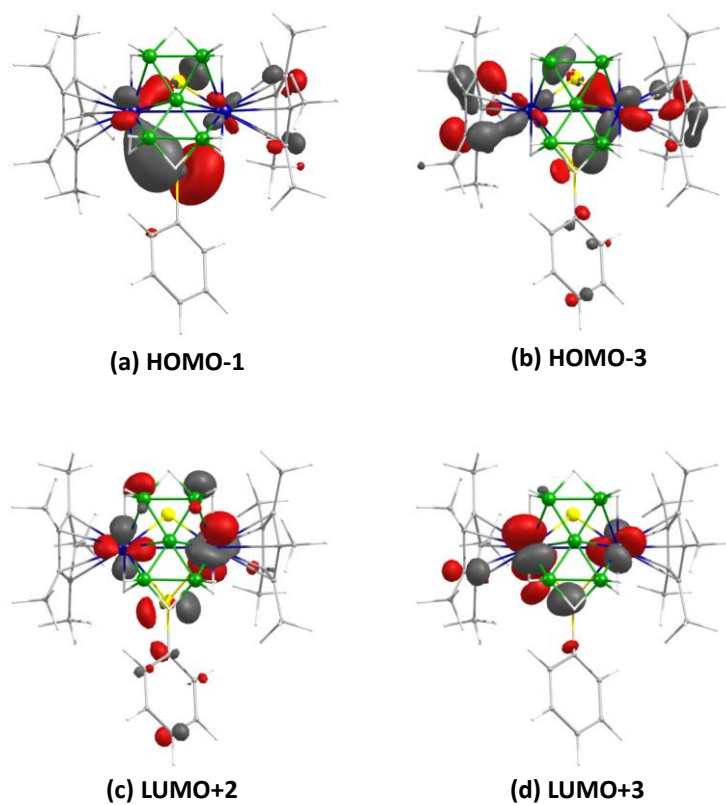

**Figure S54.** Selected molecular orbitals of **3a** related to most intense electronic transitions [isocontour values:  $\pm 0.045$  ( $e/\text{bohr}^3$ )<sup>1/2</sup>].

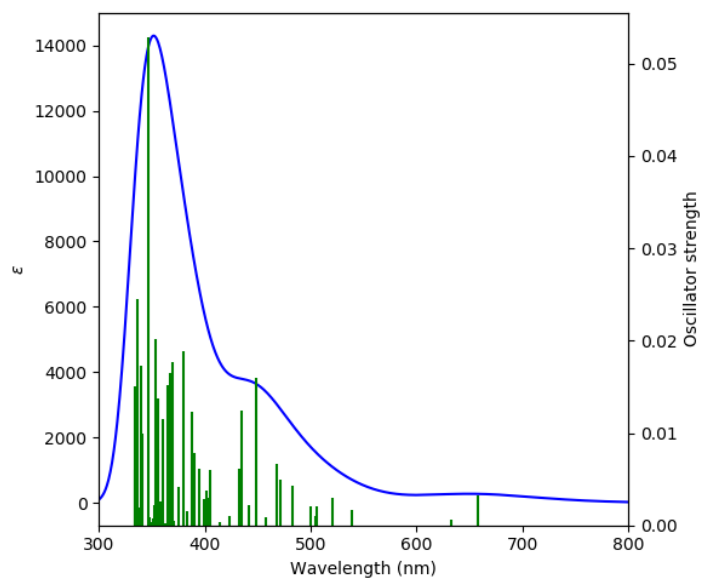

**Figure S55.** Absorption spectrum of **3b** computed at TD-DFT-B3LYP/Def2-SVP level of theory ( $\epsilon$  in  $\text{LM}^{-1}\text{cm}^{-1}$ ).



**Table S9.** TD-DFT calculated energies (excitation energy (eV),  $\lambda_{\text{calc}}$  (nm)), oscillator strength ( $f$ ), and main composition of the first UV-vis electronic excitations for **3b**. Experimental absorption wavelengths ( $\lambda_{\text{exp}}$ , nm) of **3b** are given for comparison.

| No | Excitation Energy (eV) | Wavelength $\lambda$ (nm)    |       | Main electronic transition (% weight) <sup>[b]</sup>                               |
|----|------------------------|------------------------------|-------|------------------------------------------------------------------------------------|
|    |                        | Calc. ( $f$ ) <sup>[a]</sup> | Expt. |                                                                                    |
| 1  | 2.767                  | 448 (0.016)                  |       | HOMO→LUMO+2 (85)                                                                   |
| 2  | 2.849                  | 435 (0.012)                  |       | HOMO-4→LUMO (21)<br>HOMO-2→LUMO (16)<br>HOMO-6→LUMO (13)                           |
| 3  | 3.200                  | 387 (0.012)                  |       | HOMO→LUMO+5 (38)<br>HOMO-10→LUMO (11)                                              |
| 4  | 3.259                  | 380 (0.019)                  |       | HOMO-2→LUMO+2 (74)                                                                 |
| 5  | 3.352                  | 370 (0.018)                  |       | HOMO-3→LUMO+2 (73)                                                                 |
| 6  | 3.374                  | 367 (0.017)                  |       | HOMO-1→LUMO+3 (80)                                                                 |
| 7  | 3.398                  | 365 (0.015)                  | 366   | HOMO-4→LUMO+2 (61)<br>HOMO→LUMO+6 (22)                                             |
| 8  | 3.440                  | 360 (0.012)                  |       | HOMO-1→LUMO+4 (28)<br>HOMO-4→LUMO+2 (14)<br>HOMO-5→LUMO+2 (14)<br>HOMO→LUMO+6 (13) |
| 9  | 3.487                  | 356 (0.014)                  |       | HOMO→LUMO+7 (54)<br>HOMO-1→LUMO+4 (15)                                             |
| 10 | 3.509                  | 353 (0.020)                  |       | HOMO-5→LUMO+2 (39)<br>HOMO→LUMO+6 (11)                                             |

<sup>[a]</sup>Oscillator strength greater than 0.010 and <sup>[b]</sup>Components with greater than 10% contribution shown.

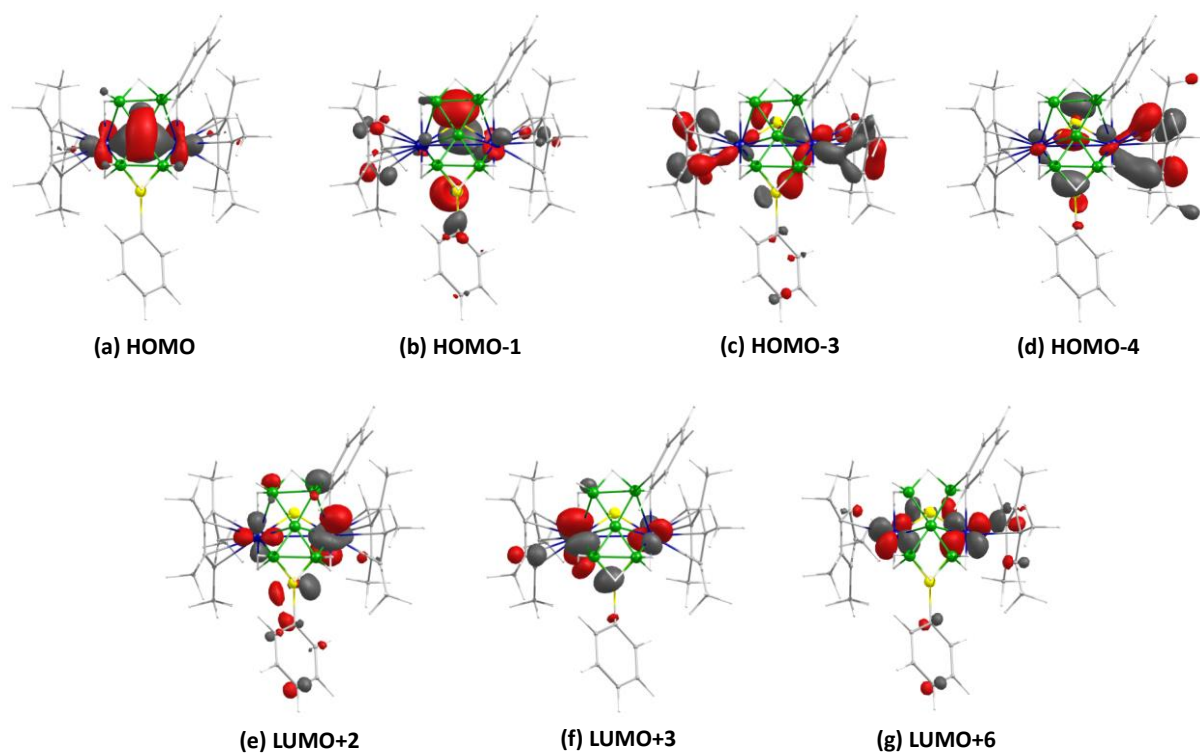

**Figure S56.** Selected molecular orbitals of **3b** related to most intense electronic transitions [isocontour values:  $\pm 0.045$  ( $e/\text{bohr}^3$ )<sup>1/2</sup>].

### III Cartesian Coordinates of all Optimized Structures

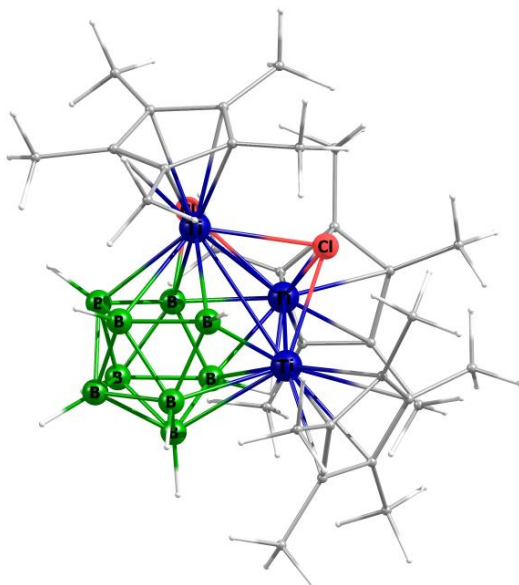

**Figure S57.** Optimized geometry of **1**.

Total energy = -4868.87421928 a.u.

Cartesian coordinates for the calculated structure **1** (in Å)

|   |              |              |              |   |              |              |              |
|---|--------------|--------------|--------------|---|--------------|--------------|--------------|
| C | 3.476540000  | -0.442368000 | 1.661539000  | H | -1.347465000 | -4.578216000 | 1.067327000  |
| C | 4.220380000  | -0.165276000 | 0.474475000  | H | -2.813521000 | -4.720324000 | 2.051302000  |
| C | 4.192282000  | -1.340544000 | -0.347271000 | C | -2.663372000 | -4.081119000 | -1.495165000 |
| C | 3.455108000  | -2.348853000 | 0.350838000  | H | -3.540420000 | -4.739975000 | -1.614688000 |
| C | 2.995263000  | -1.793415000 | 1.588347000  | H | -1.836884000 | -4.703685000 | -1.127371000 |
| C | 3.335496000  | 0.473550000  | 2.840159000  | H | -2.390428000 | -3.719440000 | -2.496718000 |
| H | 3.354864000  | 1.527511000  | 2.533119000  | C | -4.363466000 | -1.498631000 | -2.237648000 |
| H | 4.165022000  | 0.321132000  | 3.552590000  | H | -3.775777000 | -1.911659000 | -3.068154000 |
| H | 2.399708000  | 0.300226000  | 3.390240000  | H | -4.476192000 | -0.421944000 | -2.421523000 |
| C | 5.066730000  | 1.042613000  | 0.218553000  | H | -5.370267000 | -1.950796000 | -2.286178000 |
| H | 4.781808000  | 1.884180000  | 0.862221000  | C | -4.929227000 | 0.092629000  | 0.435324000  |
| H | 4.986619000  | 1.377828000  | -0.824583000 | H | -5.949736000 | -0.322788000 | 0.513749000  |
| H | 6.126363000  | 0.808084000  | 0.421339000  | H | -4.919853000 | 0.759766000  | -0.435562000 |
| C | 4.978697000  | -1.544681000 | -1.607966000 | H | -4.761472000 | 0.699451000  | 1.334291000  |
| H | 6.010510000  | -1.856792000 | -1.367822000 | C | -3.390429000 | -1.378541000 | 2.842663000  |
| H | 5.032363000  | -0.623298000 | -2.201624000 | H | -4.229375000 | -1.901619000 | 3.333106000  |
| H | 4.537142000  | -2.323163000 | -2.244809000 | H | -3.543297000 | -0.302361000 | 2.992227000  |
| C | 3.311552000  | -3.777648000 | -0.090095000 | H | -2.473880000 | -1.663469000 | 3.379081000  |
| H | 3.157669000  | -3.863926000 | -1.175478000 | C | -1.577653000 | 2.891837000  | 1.421959000  |
| H | 2.475388000  | -4.284277000 | 0.411464000  | C | -2.022707000 | 3.312723000  | 0.132280000  |
| H | 4.226930000  | -4.344771000 | 0.152266000  | C | -0.929841000 | 3.958860000  | -0.527961000 |
| C | 2.292695000  | -2.541319000 | 2.685598000  | C | 0.189650000  | 3.965187000  | 0.367424000  |
| H | 3.020913000  | -3.040659000 | 3.348339000  | C | -0.203776000 | 3.287860000  | 1.560402000  |
| H | 1.625944000  | -3.322723000 | 2.292641000  | C | -2.416847000 | 2.356036000  | 2.543395000  |
| H | 1.687470000  | -1.872981000 | 3.314089000  | H | -1.899904000 | 1.569283000  | 3.112278000  |
| C | -2.737192000 | -2.926980000 | 0.860893000  | H | -3.366717000 | 1.942949000  | 2.180663000  |
| C | -2.988545000 | -2.955004000 | -0.556088000 | H | -2.663402000 | 3.160329000  | 3.258744000  |
| C | -3.722126000 | -1.775735000 | -0.906881000 | C | -3.422505000 | 3.278607000  | -0.409060000 |
| C | -3.938631000 | -1.026058000 | 0.306449000  | H | -3.826954000 | 4.303174000  | -0.474806000 |
| C | -3.326025000 | -1.740504000 | 1.387688000  | H | -4.095930000 | 2.702990000  | 0.235663000  |
| C | -2.068110000 | -4.003568000 | 1.665328000  | H | -3.471810000 | 2.854944000  | -1.423896000 |
| H | -1.533335000 | -3.593300000 | 2.533757000  | C | -1.031824000 | 4.729462000  | -1.810192000 |

|   |              |              |              |    |              |              |              |
|---|--------------|--------------|--------------|----|--------------|--------------|--------------|
| H | -1.777639000 | 4.296879000  | -2.490252000 | B  | -0.313624000 | 1.440177000  | -2.782191000 |
| H | -0.073959000 | 4.753883000  | -2.344682000 | H  | -1.050840000 | 2.172869000  | -3.392331000 |
| H | -1.333277000 | 5.771648000  | -1.601002000 | B  | -0.004316000 | -0.248106000 | -3.334323000 |
| C | 1.446246000  | 4.754472000  | 0.167118000  | H  | -0.476197000 | -0.868184000 | -4.245971000 |
| H | 2.225238000  | 4.471809000  | 0.886428000  | B  | 1.283237000  | 0.942510000  | -3.419397000 |
| H | 1.236820000  | 5.829666000  | 0.306513000  | H  | 1.698715000  | 1.254574000  | -4.499626000 |
| H | 1.856182000  | 4.615840000  | -0.842480000 | B  | 0.216103000  | -0.897006000 | -1.696430000 |
| C | 0.604252000  | 3.172119000  | 2.819579000  | B  | -1.081203000 | 0.109462000  | -1.960081000 |
| H | 0.397262000  | 4.021595000  | 3.494200000  | B  | 1.895528000  | 1.581509000  | -0.603288000 |
| H | 1.681957000  | 3.175830000  | 2.610629000  | H  | 2.606426000  | 2.317633000  | 0.036323000  |
| H | 0.373242000  | 2.252847000  | 3.376946000  | Cl | 0.225707000  | -2.645325000 | -0.750583000 |
| B | 1.614677000  | -0.621653000 | -2.610871000 | Cl | -0.059471000 | -0.168995000 | 1.471321000  |
| H | 2.207136000  | -1.562933000 | -3.076313000 | Ti | 1.897535000  | -0.622775000 | -0.176971000 |
| B | 2.448814000  | 0.834450000  | -2.066121000 | Ti | -1.608734000 | -1.093595000 | -0.213014000 |
| H | 3.596015000  | 1.010797000  | -2.392870000 | Ti | -0.292500000 | 1.630462000  | -0.191800000 |
| B | 1.189100000  | 2.135865000  | -2.091167000 | H  | -1.882397000 | 0.557464000  | -1.204823000 |
| H | 1.431319000  | 3.271207000  | -2.412046000 |    |              |              |              |

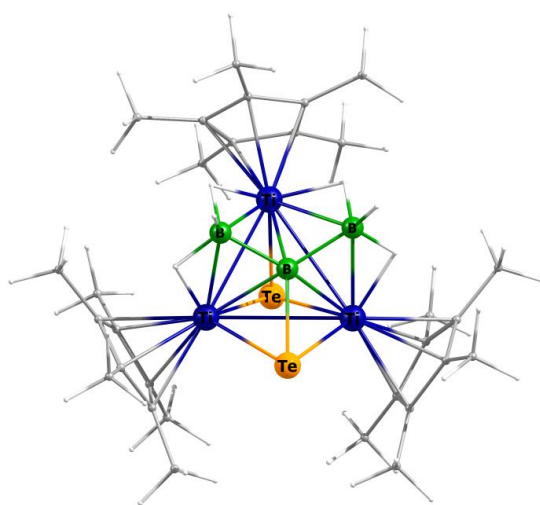

**Figure S58.** Optimized geometry of **2**

Total energy = -4332.65686166 a.u.

Cartesian coordinates for the calculated structure **2** (in Å)

|   |              |             |              |   |              |              |              |
|---|--------------|-------------|--------------|---|--------------|--------------|--------------|
| C | -1.714365000 | 3.038749000 | 1.300385000  | C | -3.225185000 | 3.736493000  | -0.718030000 |
| C | -0.317777000 | 3.172484000 | 1.641286000  | H | -3.717053000 | 4.686125000  | -0.408957000 |
| C | 0.351439000  | 3.786402000 | 0.520815000  | H | -3.925929000 | 2.911210000  | -0.482399000 |
| C | -0.628485000 | 4.027018000 | -0.505838000 | H | -3.109740000 | 3.769160000  | -1.819467000 |
| C | -1.903961000 | 3.571970000 | -0.016218000 | C | -2.708094000 | -2.894849000 | 0.516150000  |
| C | -2.798612000 | 2.591584000 | 2.241364000  | C | -2.861973000 | -3.110646000 | -0.902727000 |
| H | -2.457990000 | 1.770559000 | 2.904077000  | C | -3.661865000 | -2.039901000 | -1.430584000 |
| H | -3.695448000 | 2.235176000 | 1.696735000  | C | -4.034546000 | -1.181554000 | -0.328503000 |
| H | -3.125464000 | 3.431973000 | 2.895359000  | C | -3.459252000 | -1.715534000 | 0.867550000  |
| C | 0.282468000  | 2.978327000 | 3.008377000  | C | -2.058269000 | -3.844052000 | 1.487448000  |
| H | 1.334360000  | 2.632583000 | 2.957749000  | H | -2.791314000 | -4.589858000 | 1.872152000  |
| H | -0.278388000 | 2.233437000 | 3.606247000  | H | -1.636332000 | -3.311362000 | 2.363128000  |
| H | 0.277150000  | 3.936769000 | 3.576989000  | H | -1.232661000 | -4.416119000 | 1.017701000  |
| C | 1.771623000  | 4.287216000 | 0.533978000  | C | -2.432854000 | -4.340536000 | -1.660370000 |
| H | 1.834604000  | 5.268734000 | 1.057245000  | H | -1.517275000 | -4.796641000 | -1.233828000 |
| H | 2.170709000  | 4.434512000 | -0.489091000 | H | -2.227271000 | -4.123230000 | -2.727166000 |
| H | 2.454232000  | 3.591334000 | 1.062384000  | H | -3.232407000 | -5.114470000 | -1.627789000 |
| C | -0.386913000 | 4.722337000 | -1.818447000 | C | -4.145850000 | -1.918726000 | -2.851058000 |
| H | -1.052509000 | 4.340316000 | -2.618819000 | H | -3.400441000 | -2.302366000 | -3.576596000 |
| H | 0.656227000  | 4.588081000 | -2.168534000 | H | -4.358763000 | -0.866631000 | -3.127341000 |
| H | -0.569919000 | 5.817345000 | -1.731402000 | H | -5.084439000 | -2.497742000 | -3.005755000 |

|   |              |              |              |    |              |              |              |
|---|--------------|--------------|--------------|----|--------------|--------------|--------------|
| C | -4.986647000 | -0.020175000 | -0.417081000 | H  | 5.292855000  | -2.486743000 | -2.062566000 |
| H | -4.847535000 | 0.690975000  | 0.421187000  | C  | 2.722329000  | -4.264986000 | -0.401005000 |
| H | -6.042875000 | -0.370612000 | -0.377782000 | H  | 1.770128000  | -4.652009000 | 0.014815000  |
| H | -4.867331000 | 0.546773000  | -1.362349000 | H  | 3.528355000  | -4.960446000 | -0.075545000 |
| C | -3.743846000 | -1.255619000 | 2.270293000  | H  | 2.655474000  | -4.331343000 | -1.504746000 |
| H | -4.593565000 | -1.834243000 | 2.698994000  | C  | 2.138446000  | -3.122801000 | 2.516621000  |
| H | -4.020976000 | -0.184510000 | 2.310669000  | H  | 2.912931000  | -3.711741000 | 3.058579000  |
| H | -2.874058000 | -1.398942000 | 2.942652000  | H  | 1.371869000  | -3.840157000 | 2.161609000  |
| C | 3.335082000  | -1.037257000 | 1.470480000  | H  | 1.650249000  | -2.454889000 | 3.254003000  |
| C | 3.956878000  | -0.738141000 | 0.206668000  | Te | 1.841049000  | 1.334267000  | -1.695503000 |
| C | 3.744870000  | -1.860669000 | -0.671459000 | Te | -0.244263000 | -0.338782000 | 1.648536000  |
| C | 3.016482000  | -2.862947000 | 0.064610000  | B  | 0.276390000  | -1.802374000 | -1.982345000 |
| C | 2.757352000  | -2.351181000 | 1.382903000  | H  | 1.198035000  | -2.374407000 | -1.314187000 |
| C | 3.428264000  | -0.190040000 | 2.710143000  | H  | -0.744818000 | -2.455446000 | -1.564660000 |
| H | 4.371409000  | -0.401877000 | 3.263588000  | H  | 0.428611000  | -2.233122000 | -3.120812000 |
| H | 2.584896000  | -0.377615000 | 3.403922000  | B  | -1.413947000 | 0.691723000  | -2.178401000 |
| H | 3.427308000  | 0.892598000  | 2.471026000  | H  | -1.504536000 | 1.875856000  | -1.700862000 |
| C | 4.873499000  | 0.427539000  | -0.053790000 | H  | -2.463796000 | 0.055317000  | -1.843986000 |
| H | 4.532843000  | 1.352847000  | 0.452958000  | H  | -1.578699000 | 0.894792000  | -3.378261000 |
| H | 4.964806000  | 0.652704000  | -1.134647000 | Ti | -0.424531000 | 1.670714000  | -0.209778000 |
| H | 5.897029000  | 0.203027000  | 0.324278000  | Ti | -1.624813000 | -1.097290000 | -0.656001000 |
| C | 4.286048000  | -2.010629000 | -2.067892000 | Ti | 1.609284000  | -0.948791000 | -0.210921000 |
| H | 4.385455000  | -1.030199000 | -2.575344000 | B  | 0.076734000  | -0.097829000 | -1.699728000 |
| H | 3.626810000  | -2.639490000 | -2.699549000 |    |              |              |              |

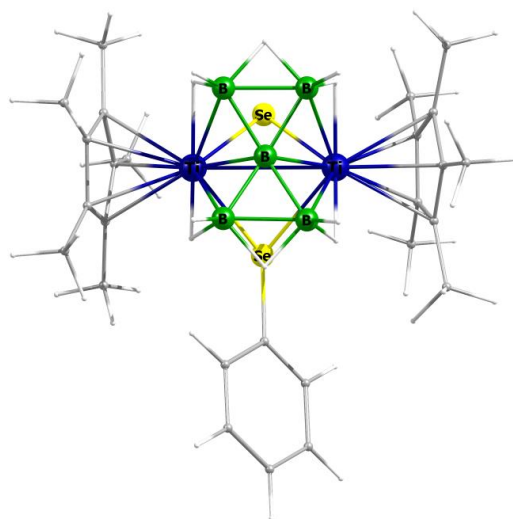

**Figure S59.** Optimized geometry of **3a**.

Total energy = -7643.59331474 a.u.

Cartesian coordinates for the calculated structure **3a** (in Å)

|   |              |              |              |   |              |              |              |
|---|--------------|--------------|--------------|---|--------------|--------------|--------------|
| C | 3.818880000  | -1.229890000 | 0.782802000  | C | -4.249092000 | -0.656452000 | 2.516422000  |
| C | 3.797189000  | 0.192121000  | 0.588503000  | H | -3.953469000 | 0.278414000  | 3.030772000  |
| C | 3.390606000  | 0.451452000  | -0.767896000 | H | -3.826246000 | -1.498915000 | 3.098666000  |
| C | 3.183337000  | -0.817203000 | -1.418249000 | H | -5.358060000 | -0.733505000 | 2.577518000  |
| C | 3.439849000  | -1.856326000 | -0.461644000 | C | -0.013396000 | 3.036965000  | -0.262706000 |
| C | 4.328053000  | -1.930054000 | 2.013653000  | C | 0.844781000  | 3.589576000  | 0.711263000  |
| H | 5.440041000  | -1.981673000 | 1.996531000  | H | 1.569487000  | 2.951444000  | 1.235691000  |
| H | 3.950270000  | -2.967713000 | 2.089767000  | C | 0.788929000  | 4.962120000  | 1.018325000  |
| H | 4.036698000  | -1.405039000 | 2.944875000  | H | 1.467327000  | 5.372758000  | 1.783791000  |
| C | -3.794245000 | -0.678226000 | 1.081474000  | C | -0.120450000 | 5.805044000  | 0.357721000  |
| C | -3.603636000 | -1.858430000 | 0.279320000  | H | -0.162868000 | 6.878209000  | 0.602038000  |
| C | -3.284534000 | -1.444306000 | -1.058282000 | C | -0.968319000 | 5.266227000  | -0.626372000 |
| C | -3.307409000 | -0.004555000 | -1.092022000 | H | -1.677310000 | 5.916823000  | -1.163758000 |
| C | -3.625212000 | 0.469943000  | 0.226344000  | C | -0.910767000 | 3.896841000  | -0.937532000 |

|   |              |              |              |    |              |              |              |
|---|--------------|--------------|--------------|----|--------------|--------------|--------------|
| H | -1.558967000 | 3.490927000  | -1.730878000 | H  | -3.080733000 | 1.898343000  | -2.113718000 |
| C | 4.297672000  | 1.211504000  | 1.576072000  | H  | -4.121554000 | 0.713591000  | -2.956968000 |
| H | 3.875117000  | 2.218153000  | 1.386929000  | H  | -2.339845000 | 0.516868000  | -2.972849000 |
| H | 5.404773000  | 1.304561000  | 1.507169000  | C  | -3.890066000 | 1.901993000  | 0.607778000  |
| H | 4.054901000  | 0.936711000  | 2.621337000  | H  | -3.191263000 | 2.604375000  | 0.112032000  |
| C | 3.410807000  | 1.785619000  | -1.461567000 | H  | -3.797617000 | 2.061065000  | 1.699744000  |
| H | 3.220697000  | 2.625553000  | -0.765326000 | H  | -4.922997000 | 2.198001000  | 0.317194000  |
| H | 2.649037000  | 1.844303000  | -2.264178000 | B  | -0.852373000 | -2.253448000 | 2.277714000  |
| H | 4.405206000  | 1.962541000  | -1.930626000 | B  | 0.027058000  | -0.803484000 | 2.045255000  |
| C | 2.895362000  | -1.001190000 | -2.881595000 | B  | 0.929909000  | -2.243592000 | 2.270210000  |
| H | 2.186521000  | -0.237358000 | -3.259779000 | B  | 0.932641000  | 0.558002000  | 2.530131000  |
| H | 2.457174000  | -1.995498000 | -3.094288000 | B  | -0.855532000 | 0.579942000  | 2.529707000  |
| H | 3.833276000  | -0.911101000 | -3.475330000 | Se | -0.003717000 | -1.873824000 | -1.145535000 |
| C | 3.454865000  | -3.332437000 | -0.753801000 | Se | 0.018827000  | 1.163156000  | -0.886750000 |
| H | 4.428148000  | -3.634589000 | -1.201556000 | Ti | -1.509085000 | -0.661915000 | 0.401387000  |
| H | 2.655181000  | -3.616961000 | -1.466632000 | Ti | 1.539891000  | -0.638598000 | 0.360242000  |
| H | 3.313507000  | -3.937772000 | 0.163431000  | H  | -1.475552000 | -2.453676000 | 1.195886000  |
| C | -3.869770000 | -3.274506000 | 0.714622000  | H  | 1.549554000  | -2.446710000 | 1.186566000  |
| H | -3.715326000 | -3.412116000 | 1.802314000  | H  | 0.038687000  | -3.250413000 | 2.102104000  |
| H | -3.220432000 | -4.001453000 | 0.187069000  | H  | 1.579377000  | -2.510448000 | 3.261313000  |
| H | -4.924344000 | -3.552373000 | 0.491619000  | H  | -1.499585000 | 0.680695000  | 3.555900000  |
| C | -3.174932000 | -2.339261000 | -2.260751000 | H  | 1.595209000  | 0.648786000  | 3.546326000  |
| H | -4.171903000 | -2.472165000 | -2.739281000 | H  | 1.589108000  | 0.931963000  | 1.510582000  |
| H | -2.795486000 | -3.345894000 | -1.996119000 | H  | -1.499301000 | 0.970863000  | 1.508840000  |
| H | -2.489119000 | -1.921102000 | -3.024010000 | H  | 0.048365000  | 1.583629000  | 2.550295000  |
| C | -3.199430000 | 0.822043000  | -2.342550000 | H  | -1.500110000 | -2.526851000 | 3.269782000  |

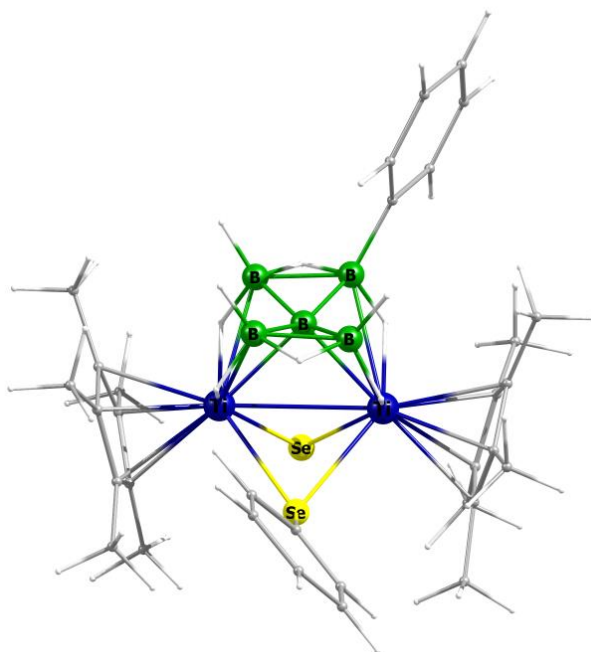

**Figure S60.** Optimized geometry of **3b**.

Total energy = -7874.48302201 a.u.

Cartesian coordinates for the calculated structure **3b** (in Å)

|   |              |              |              |   |              |              |              |
|---|--------------|--------------|--------------|---|--------------|--------------|--------------|
| C | -3.797294000 | -1.397733000 | 1.181910000  | C | -5.149041000 | -1.455812000 | 3.241600000  |
| C | -4.977953000 | -1.712616000 | 0.461187000  | H | -5.206124000 | -1.359508000 | 4.338259000  |
| H | -4.926388000 | -1.841231000 | -0.633407000 | C | -3.914966000 | -1.285643000 | 2.588970000  |
| C | -6.215842000 | -1.888197000 | 1.104529000  | H | -3.017577000 | -1.060405000 | 3.185898000  |
| H | -7.112947000 | -2.136064000 | 0.513723000  | C | 2.056303000  | -3.595868000 | 0.363230000  |
| C | -6.306464000 | -1.753665000 | 2.501230000  | C | 2.935820000  | -2.641643000 | 0.975415000  |
| H | -7.274288000 | -1.888065000 | 3.010977000  | C | 3.480649000  | -1.806218000 | -0.063059000 |

|   |              |              |              |    |              |              |              |
|---|--------------|--------------|--------------|----|--------------|--------------|--------------|
| C | 2.948076000  | -2.260527000 | -1.321859000 | C  | 1.384531000  | -4.206918000 | -2.103908000 |
| C | 2.062058000  | -3.359377000 | -1.061354000 | H  | 2.078089000  | -4.989016000 | -2.486509000 |
| C | 1.401527000  | -4.751906000 | 1.069543000  | H  | 1.050896000  | -3.601276000 | -2.970170000 |
| H | 2.121357000  | -5.594219000 | 1.178317000  | H  | 0.493684000  | -4.727417000 | -1.699786000 |
| H | 0.523832000  | -5.136927000 | 0.515734000  | C  | -4.143976000 | 0.848061000  | -2.062706000 |
| H | 1.055228000  | -4.480726000 | 2.086370000  | H  | -4.737387000 | 0.437966000  | -1.223969000 |
| C | -2.817929000 | 2.282824000  | -0.307530000 | H  | -3.859692000 | 0.005715000  | -2.725193000 |
| C | -2.946977000 | 1.620872000  | -1.580325000 | H  | -4.815991000 | 1.513933000  | -2.649447000 |
| C | -1.822018000 | 1.987643000  | -2.393085000 | C  | -1.642876000 | 1.670573000  | -3.850963000 |
| C | -1.008957000 | 2.901605000  | -1.634909000 | H  | -2.109521000 | 2.461788000  | -4.481076000 |
| C | -1.621379000 | 3.084932000  | -0.347995000 | H  | -2.112440000 | 0.705752000  | -4.126111000 |
| C | -3.837519000 | 2.277190000  | 0.799954000  | H  | -0.572593000 | 1.606153000  | -4.130784000 |
| H | -3.372818000 | 2.441133000  | 1.791860000  | C  | 0.153951000  | 3.670160000  | -2.195848000 |
| H | -4.392228000 | 1.320232000  | 0.853106000  | H  | 0.704328000  | 4.215899000  | -1.406027000 |
| H | -4.584102000 | 3.088771000  | 0.646310000  | H  | -0.205746000 | 4.425658000  | -2.930255000 |
| C | 2.466734000  | 2.167786000  | 1.135615000  | H  | 0.878516000  | 3.013999000  | -2.719160000 |
| C | 2.863537000  | 1.645076000  | 2.384673000  | C  | -1.184521000 | 4.068662000  | 0.704884000  |
| H | 2.704553000  | 0.582676000  | 2.615606000  | H  | -0.081640000 | 4.129498000  | 0.792694000  |
| C | 3.472755000  | 2.473049000  | 3.346232000  | H  | -1.581879000 | 3.804672000  | 1.704217000  |
| H | 3.773232000  | 2.044229000  | 4.316092000  | H  | -1.556545000 | 5.089227000  | 0.461598000  |
| C | 3.698650000  | 3.833343000  | 3.077081000  | B  | -2.392920000 | -1.265947000 | 0.428120000  |
| H | 4.173602000  | 4.478751000  | 3.832762000  | B  | -0.841582000 | -0.870791000 | 1.089065000  |
| C | 3.321591000  | 4.359513000  | 1.828714000  | B  | -1.124532000 | -2.506762000 | 0.664161000  |
| H | 3.504733000  | 5.421241000  | 1.596521000  | B  | 0.320548000  | -0.794635000 | 2.340387000  |
| C | 2.717149000  | 3.533245000  | 0.865741000  | B  | -0.838629000 | 0.539309000  | 2.056063000  |
| H | 2.451628000  | 3.949557000  | -0.119168000 | Se | 0.053236000  | -0.713896000 | -2.149124000 |
| C | 3.352510000  | -2.646398000 | 2.421582000  | Se | 1.702352000  | 1.121469000  | -0.356787000 |
| H | 3.729093000  | -1.657600000 | 2.750480000  | Ti | -0.987509000 | 0.764127000  | -0.461618000 |
| H | 4.174024000  | -3.379472000 | 2.585067000  | Ti | 1.082953000  | -1.437033000 | -0.004486000 |
| H | 2.520307000  | -2.928693000 | 3.095952000  | H  | -2.422469000 | -0.621898000 | -0.668619000 |
| C | 4.590539000  | -0.803746000 | 0.093624000  | H  | -0.302819000 | -2.792649000 | -0.255239000 |
| H | 4.605137000  | -0.343809000 | 1.100775000  | H  | -2.169062000 | -2.470370000 | -0.175912000 |
| H | 4.510292000  | 0.019477000  | -0.643950000 | H  | -1.304289000 | -3.413837000 | 1.451538000  |
| H | 5.578187000  | -1.294626000 | -0.060286000 | H  | -1.684784000 | 0.856938000  | 2.868678000  |
| C | 3.369175000  | -1.751072000 | -2.671396000 | H  | 0.326116000  | -1.469364000 | 3.352929000  |
| H | 3.506275000  | -0.650894000 | -2.669537000 | H  | 1.461039000  | -0.781861000 | 1.786444000  |
| H | 2.624577000  | -1.992196000 | -3.454460000 | H  | -0.537354000 | 1.506576000  | 1.290041000  |
| H | 4.338373000  | -2.209000000 | -2.973369000 | H  | 0.322372000  | 0.498671000  | 2.742099000  |

## References

- 1 G. H. Llinás, M. Mena, F. Palacios, P. Royo and R. Serrano, *J. Organomet. Chem.*, 1988, **340**, 37.
- 2 R. Ramalakshmi, K. Saha, D. K. Roy, B. Varghese, A. K. Phukan and S. Ghosh, *Chem. Eur. J.*, 2015, **21**, 17191.
- 3 M. T. Mock, R. G. Potter, D. M. Camaioni, J. Li, W. G. Dougherty, W. S. Kassel, B. Twamley and D. L. DuBois, *J. Am. Chem. Soc.*, 2009, **131**, 14454.
- 4 (a) J. J. Led and H. Gesmar, *Chem. Rev.*, 1991, **91**, 1413; (b) L. Yang, R. Simionescu, A. Lough and H. Yan, *Dyes Pigm.*, 2011, **91**, 264; (c) R. Weiss and R. N. Grimes, *J. Am. Chem. Soc.*, 1978, **100**, 1401.
- 5 S. Kar, S. Bairagi, J.-F. Halet and S. Ghosh, *Chem. Commun.*, 2023, **59**, 11676.
- 6 P. Govindaswamy, Y. A. Mozharivskyy, M. R. Kollipara, *Polyhedron* **2005**, **24**, 1710.
- 7 P. Govindaswamy, Y. A. Mozharivskyy, M. R. Kollipara, *Polyhedron* **2005**, **24**, 1710.
- 8 a) C. E. Rao, S. K. Barik, K. Yuvaraj, K. Bakthavachalam, T. Roisnel, V. Dorcet, J.-F. Halet, Ghosh, *Eur. J. Inorg. Chem.* **2016**, 4913; b) A. Haridas, S. Kar, B. Raghavendra, T. Roisnel, V. Dorcet, S. Ghosh, *Organometallics* **2020**, **39**, 58.
- 9 S. Bairagi, S. Giri, G. Joshi, E. D. Jemmis and S. Ghosh, *Angew. Chem. Int. Ed.*, 2024, e202417170.
- 10 A. Altomare, G. Cascarano, C. Giacovazzo, A. Guagliardi, M. C. Burla, G. Polidori and M. Camalli, *J. Appl. Crystallogr.*, 1994, **27**, 435.
- 11 G. M. Sheldrick, *Acta Cryst.*, 2015, **C71**, 3.
- 12 O. V. Dolomanov, L. J. Bourhis, R. J. Gildea, J. A. K. Howard and H. Puschmann, *J. Appl. Cryst.*, 2009, **42**, 339.
- 13 M. J. Frisch, G. W. Trucks, H. B. Schlegel, G. E. Scuseria, M. A. Robb, J. R. Cheeseman, G. Scalmani, V. Barone, B. Mennucci, G. A. Petersson, H. Nakatsuji, M. Caricato, X. Li, H. P. Hratchian, A. F. Izmaylov, J. Bloino, G. Zheng, J. L. Sonnenberg, M. Hada, M. Ehara, K. Toyota, R. Fukuda, J. Hasegawa, M. Ishida, T. Nakajima, Y. Honda, O. Kitao, H. Nakai, T. Vreven, J. A. Montgomery Jr., J. E. Peralta, F. Ogliaro, M. Bearpark, J. J. Heyd, E. Brothers, K. N. Kudin, V. N. Staroverov, R. Kobayashi, J. Normand, K. Raghavachari, A. Rendell, J. C. Burant, S. S. Iyengar, J. Tomasi, M. Cossi, N. Rega, J. M. Millam, M. Klene, J. E. Knox, J. B. Cross, V. Bakken, C. Adamo, J. Jaramillo, R. Gomperts, R. E. Stratmann, O. Yazyev, A. J. Austin, R. Cammi, C. Pomelli, J. W. Ochterski, R. L. Martin, K. Morokuma, V. G. Zakrzewski, G. A. Voth, P. Salvador, J. J. Dannenberg, S. Dapprich, A. D. Daniels, Ö. Farkas, J. B. Foresman, J. V. Ortiz, J. Cioslowski, D. J. Fox, *Gaussian 09, Revision C.01*, Gaussian, Inc., Wallingford, CT, 2010.
- 14 (a) H. L. Schmider, A. D. Becke, *J. Chem. Phys.* 1998, **108**, 9624; (b) J. P. Perdew, *Phys. Rev. B: Condens. Matter Mater. Phys.* 1986, **33**, 8822.
- 15 EMSL Basis Set Exchange Library. <https://bse.pnl.gov/bse/portal>
- 16 F. London, *J. Phys. Radium.*, 1937, **8**, 397.
- 17 R. Ditchfield, *Mol. Phys.*, 1974, **27**, 789.
- 18 K. Wolinski, J. F. Hinton and P. Pulay, *J. Am. Chem. Soc.*, 1990, **112**, 8251.
- 19 (a) A. D. Becke, *Phys. Rev. A.*, 1988, **38**, 3098; (b) C. Lee, W. Yang and R. G. Parr, *Phys. Rev. B.*, 1988, **37**, 785; (c) A. D. Becke, *J. Chem. Phys.*, 1993, **98**, 5648.
- 20 T. P. Onak, H. L. Landesman, R. E. Williams and I. Shapiro, *J. Phys. Chem.*, 1959, **63**, 1533.
- 21 (a) E. D. Glendening, A. E. Reed, J. E. Carpenter and F. Weinhold, *NBO Program 3.1*, W. T. Madison, 1988; (b) A. E. Reed, F. Weinhold and L. A. Curtiss, *Chem. Rev.*, 1988, **88**, 899; (c) F. Weinhold and R. Landis, *Valency and bonding: A natural bond orbital donor-acceptor perspective*; Cambridge University Press: Cambridge, U.K, 2005.
- 22 K. Wiberg, *Tetrahedron*, 1968, **24**, 1083.
- 23 (a) R. F. W. Bader, *Atoms in Molecules: A Quantum Theory*; Oxford University Press: Oxford, U. K., 1990; (b) R. F. W. Bader, *J. Phys. Chem. A.*, 1998, **102**, 7314; (c) R. F. W. Bader, *Chem. Rev.*, 1991, **91**, 893.
- 24 T. Lu, F. Chen, *J. Comput. Chem.*, 2012, **33**, 580.
- 25 I. I. Dennington, R. T. Keith, J. Millam, K. Eppinnett, W. L. Hovell and R. Gilliland, *GaussView, Version 3.09*; Semichem Inc.: Shawnee Mission, KS, 2003.
- 26 G. A. Zhurko, <http://www.chemcraftprog.com>.
